# Supplementary material
Source: PubMed Central journal article supplement (PMC10112865)
Supplement: mmc1.pdf [file mmc1.pdf]

# THE LANCET

## Child & Adolescent Health

### Supplementary appendix 1

This appendix formed part of the original submission and has been peer reviewed. We post it as supplied by the authors.

Supplement to: Piechotta V, Siemens W, Thielemann I, et al. Safety and effectiveness of vaccines against COVID-19 in children aged 5–11 years: a systematic review and meta-analysis. *Lancet Child Adolesc Health* 2023; published online April 18. [https://doi.org/10.1016/S2352-4642\(23\)00078-0](https://doi.org/10.1016/S2352-4642(23)00078-0).

## Appendix 1

|                                                                                         |    |
|-----------------------------------------------------------------------------------------|----|
| Supplementary Methods .....                                                             | 1  |
| Search strategies .....                                                                 | 1  |
| COVID-19 L-OVE (Living Overview of Evidence) platform .....                             | 1  |
| World Health Organization COVID-19 Research Database .....                              | 2  |
| Risk of Bias .....                                                                      | 3  |
| ROBINS-I .....                                                                          | 3  |
| QUIPS .....                                                                             | 4  |
| Data analysis .....                                                                     | 5  |
| Certainty of evidence (GRADE) .....                                                     | 6  |
| Study overview .....                                                                    | 7  |
| List of included studies .....                                                          | 7  |
| List of ongoing studies .....                                                           | 11 |
| List of studies awaiting classification .....                                           | 13 |
| List of excluded studies after full-text screening .....                                | 19 |
| Supplementary results .....                                                             | 25 |
| Risk of Bias .....                                                                      | 25 |
| Risk of bias in RCTs .....                                                              | 25 |
| Risk of bias in NRSIs .....                                                             | 25 |
| Risk of bias in single-arm studies .....                                                | 25 |
| Study characteristics .....                                                             | 26 |
| Study, participant and intervention characteristics .....                               | 26 |
| Study, participant and intervention characteristics (continued) .....                   | 30 |
| Overview of reported outcomes per study .....                                           | 34 |
| Vaccine effectiveness .....                                                             | 37 |
| Vaccine effectiveness against pre-Omicron SARS-CoV-2 variants .....                     | 37 |
| Summary of vaccine effectiveness findings against pre-Omicron SARS-CoV-2 variants ..... | 38 |
| Vaccine effectiveness against Omicron SARS-CoV-2 variant .....                          | 40 |
| Vaccine safety .....                                                                    | 42 |
| Overview of reported safety outcomes .....                                              | 42 |
| Additional outcomes .....                                                               | 48 |
| ICU admission due to COVID-19 .....                                                     | 48 |
| Immunogenicity .....                                                                    | 49 |
| Subgroup analyses .....                                                                 | 52 |
| Sensitivity analyses .....                                                              | 54 |
| References .....                                                                        | 56 |

## Supplementary Methods

### Search strategies

Starting from January 2022, we searched the COVID-19 L·OVE (Living Overview of Evidence) platform and World Health Organisation COVID-19 Research Database every 6 weeks. As described in the [review protocol](#) (CRD42022306822), we piloted whether a simplified search approach fully identifies the relevant literature. As all eligible studies were included in the COVID-19 L·OVE repository, searches in the World Health Organisation COVID-19 Research Database were terminated after 02 June 2022, as no additional relevant records were identified over the piloting phase.

### COVID-19 L·OVE (Living Overview of Evidence) platform

The L·OVE repository is available from <https://iloveevidence.com/>. It is regularly updated and includes 41 databases, thereby covering major databases (e.g., PubMed/Medline, EMBASE, CINAHL), trial registries (e.g., ICTRP Search Portal, Clinicaltrials.gov, ISRCTN registry) and preprint servers (e.g., medRxiv, bioRxiv, SSRN Preprints, ChinaXiv).

The search was performed using the following approach:

#### (1) Filtered by PICO:

> Prevention or treatment

> Public health

> Vaccination

> SARS-CoV-2 vaccines

#### (2) Combined with the following search string:

infan\* OR newborn\* OR new-born\* OR neo-nat\* OR neonat\* OR picu\* OR nicu\* OR baby OR babies OR suckling\* OR toddler\* OR child\* OR adolescen\* OR pediatric\* OR paediatric\* OR pube\* OR juvenil\* OR preschool\* OR youngster\* OR kindergart\* OR kid OR kids OR boy\* OR girl\*

## World Health Organization COVID-19 Research Database

The WHO COVID-19 research database is available from <https://search.bvsalud.org/global-literature-on-novel-coronavirus-2019-ncov/>. It covers multiple, multilingual databases, is updated daily, and is based on searches in databases, specific journals (e.g., Eurosurveillance), preprints, and is further complemented by hand searching, and expert-referred scientific articles.

The search was performed using the following search string:

|    |                                                                                                                                                                                                                                                                                                                                                                                                                                                                                                                                                                                                                                                                                                                                                                                                                                                                                                                                                                                                                                                                                                                                                                                                                                                                                                                                                                                                                                                                                                                                                                                                                                                                                                                                                                                                                                                                                                                                                                                                                                                                                                                                                                                                                                                                                                                                                                                                                                                                                                                                    |
|----|------------------------------------------------------------------------------------------------------------------------------------------------------------------------------------------------------------------------------------------------------------------------------------------------------------------------------------------------------------------------------------------------------------------------------------------------------------------------------------------------------------------------------------------------------------------------------------------------------------------------------------------------------------------------------------------------------------------------------------------------------------------------------------------------------------------------------------------------------------------------------------------------------------------------------------------------------------------------------------------------------------------------------------------------------------------------------------------------------------------------------------------------------------------------------------------------------------------------------------------------------------------------------------------------------------------------------------------------------------------------------------------------------------------------------------------------------------------------------------------------------------------------------------------------------------------------------------------------------------------------------------------------------------------------------------------------------------------------------------------------------------------------------------------------------------------------------------------------------------------------------------------------------------------------------------------------------------------------------------------------------------------------------------------------------------------------------------------------------------------------------------------------------------------------------------------------------------------------------------------------------------------------------------------------------------------------------------------------------------------------------------------------------------------------------------------------------------------------------------------------------------------------------------|
| #1 | infan\$ OR newborn\$ OR "new-born" OR "new-borns" OR "neo-natal" OR neonat\$ OR picu\$ OR nicu\$ OR baby OR babies OR suckling\$ OR toddler\$ OR child\$ OR adolescen\$ OR pediatric\$ OR paediatric\$ OR pube\$ OR juvenil\$ OR preschool\$ OR youngster\$ OR kindergart\$ OR kid OR kids OR boy\$ OR girl\$ OR youth OR "young people" OR teen*                                                                                                                                                                                                                                                                                                                                                                                                                                                                                                                                                                                                                                                                                                                                                                                                                                                                                                                                                                                                                                                                                                                                                                                                                                                                                                                                                                                                                                                                                                                                                                                                                                                                                                                                                                                                                                                                                                                                                                                                                                                                                                                                                                                  |
| #2 | vaccin\$ OR immunis\$ OR immuniz* OR inoculat*                                                                                                                                                                                                                                                                                                                                                                                                                                                                                                                                                                                                                                                                                                                                                                                                                                                                                                                                                                                                                                                                                                                                                                                                                                                                                                                                                                                                                                                                                                                                                                                                                                                                                                                                                                                                                                                                                                                                                                                                                                                                                                                                                                                                                                                                                                                                                                                                                                                                                     |
| #3 | mRna OR Comirnaty OR BNT162b2 OR "bnt 162" OR Pfizer-BioNTech OR tozinameran OR Vaxzervria OR Oxford-astrazeneca OR astrazeneca OR "azd 1222" OR azd1222 OR chadox-1 OR covishield OR serum-institute OR ad26.cov2.s OR ad26cov2s OR "jnj 78436735" OR jnj78436735 OR Moderna-biotech OR mRNA-1273 OR elasomeran OR "cx-024414" OR "RNA-1273" OR coronavac OR picovacc OR Sinovac OR Sinopharm OR Bibp OR "bbibp Corv" OR covaxin OR "bbv-152" OR "bbv-152a" OR "bbv-152b" OR "bbv-152c" OR bharat-biotech OR "Sputnik-V" OR "sputnik-light" OR VAC31518 OR EpiVacCorona or Convidicea or "Ad5-nCoV" or PakVac OR Novavax OR "NVX-CoV2373" OR "tak-019" OR covovax OR "COVIran Barakat" OR BBV152 OR "WIBP-CorV" OR KoviVac or CoviVac or "ZF-2001" OR ZIFIVAX OR "ZF-UZ-VAC-2001" OR "RBD-Dimer" or QazVac or "QazCovid-in" or "TAK-919" OR "ZyCoV-D" or "CIGB 66" or VLA2001 or CVnCoV OR Zorecimeran OR "CV-07050101" OR curevac OR "INO-4800" OR reluscovtogene-ralaplasmid OR pGX9501 OR "VIR-7831" or "UB-612" or BNT162 or "GRAd-COV2" or "SCB-2019" or "Razi Cov Pars" or Nanocovax or "AdCLD-CoV19" or "KD-414" or "VBI-2902a" or "COVID-eVax" or "S-268019" or "GLS-5310" or Covigenix or "VAX-001" or "Vietnam domestic vaccine" or "EXG-5003" or "AKS-452" or "DS-5670a" or "ABNCoV2" OR EuCorVac OR "IIBR-100" OR ArCov OR "AG0301-COVID19" OR "GX-19N" OR "ARCT-021" OR "LUNAR-COV19" OR "HDT-301" OR HGCO19 OR "AV-COVID-19" OR "PTX-COVID19-B" OR "COVI-VAC" OR CORVax12 OR "MVA-SARS-2-S" OR COH04S1 OR "AdimrSC-2f" OR "bacTRL-Spike" OR "COVAX-19" OR "DelINS1-2019-nCoV-RBD-OPT1" OR "GRAd-COV2" OR "UQ-CSL V451" OR "SCB-2019" OR "VXA-CoV2-1" OR "AdCOVID" OR "AAVCOVID" OR "ChAd-SARS-CoV-2-S" OR HaloVax OR LineaDNA OR MRT5500 OR PittCoVacc OR "T-COVIDTM" OR "LNP-nCoVsaRNA" OR V590 OR V591 OR "ERUCOV-VAC" OR ABNCoV2 OR BUTANVAC OR "Coviran barekat" OR MVC-COV1901 OR Epi-Vac-Corona OR COV2-PreS-dTM-AS03 OR Vidprevtyn OR Corbevax OR GBP510 OR BBV154 OR "Gam-COVID-Vac" OR GAM-KOVID-VAC OR ganulameran OR bnt-162b3 OR abdavomeran OR zorecimeran OR pidacmeran OR "BNT-162c2" OR SCB-2019 OR AG-0302 OR "SpikeVAX" OR covilo OR KCONVAC OR KconecaVac OR "BECOV2A" OR Nuvaxovid OR "MVC-COV1901" OR "aurora cov" OR "epivaccorona n" OR "erucov vac" OR "finlay fr 2" OR "FINLAY-FR-1A" OR "pastu covac" OR "nvti 06 08" OR fakhravac OR "razi cov pars" OR SpikoGen OR "COVAX-19" OR "zycov d" OR abdavomeran OR "bnt 162b1" OR bnt162b1 OR "bnt-162b1" OR "soberana 02" OR "soberana plus" |
| #4 | #1 AND #2 AND #3                                                                                                                                                                                                                                                                                                                                                                                                                                                                                                                                                                                                                                                                                                                                                                                                                                                                                                                                                                                                                                                                                                                                                                                                                                                                                                                                                                                                                                                                                                                                                                                                                                                                                                                                                                                                                                                                                                                                                                                                                                                                                                                                                                                                                                                                                                                                                                                                                                                                                                                   |

## Risk of Bias

### ROBINS-I

We used ROBINS-I<sup>1,2</sup> to assess the risk of bias in NRSI. Outcomes rated with ROBINS-I as critical were not included in the data synthesis to avoid misleading conclusions. A study was classified at critical risk of bias if at least one domain was rated as critical according to the following criteria:

- **Bias due to confounding:**  
A study was classified as critical risk of bias due to confounding if confounding was not measured and/or uncontrolled (i.e., baseline characteristics were not reported, analysis was not adjusted for covariates).
- **Bias in selection of participants into the study:**  
A study was considered to be at critical risk for selection bias if a substantial proportion of the follow-up period was likely not included in the analyses and the rate ratio or participants in intervention and control group was not constant over time.
- **Bias in classification of interventions:**  
Critical bias due to misclassification was assigned when there was an extremely high degree of misclassification of intervention status, e.g., due to an unusually strong recall bias. (Considered as unusual.)
- **Bias due to deviations from intended intervention:**  
A study was rated at critical risk of bias due to deviation from the intervention if effects on the outcome may have resulted from the initiation of and adherence to the intervention, such as when the intervention status changed over time and this was not adequately accounted for in the analysis.
- **Bias due to missing data:**  
A study was rated at critical risk for missing data bias if there were critical differences between interventions among participants with missing data, and the missing data could not be identified by appropriate analysis or were not accessible.
- **Bias in measurement of outcomes:**  
Bias in measurement of outcomes was considered critical if the outcome measurement was so different between intervention groups that they could not be reasonably compared (i. e., the methods of outcome assessment (NAAT, antigen test), or testing behavior differed significantly between intervention groups).
- **Bias in selection of the reported results:**  
Bias from selective reporting of results was considered critical when there was evidence or strong suspicion of selective reporting of results (i.e., large deviations from protocol) and the unreported results are likely to differ significantly from the reported results.

## QUIPS

The Quality In Prognosis Studies (QUIPS) tool was developed to assess the risk of bias in studies of prognostic factors.<sup>3</sup> The concept is similar to the one of other risk of bias tools and addresses study participation, attrition, outcome measurement, confounding, statistical analysis and reporting, and the measurement of the prognostic factor.

As prognostic factors are defined as any characteristic that is predictive of a person's subsequent outcome,<sup>4</sup> this could also be previous exposures (e.g. history of SARS-CoV-2 infection), but also the vaccination status of individuals when looking at outcomes following SARS-CoV-2 infection. As QUIPS is suitable for risk of bias assessments of single-arm studies, we decided to use this tool. For the domain focusing on the measurement of the prognostic factor, we considered the outlined aspects and applied them to our intervention of interest (i.e., COVID-19 vaccination).

In the respective domain, we assessed the following:

- Whether a clear definition of the vaccination status was provided (i.e. type of vaccine, number of doses, dosage)
- Whether the vaccination status was adequately recorded (e.g. in electronic health records, vaccination registries) or whether it relied on recall of caregivers or participants
- Whether the definition and recording of the vaccination status was the same for all study participants

## Data analysis

Primary analyses were performed using a random-effects model. The restricted maximum likelihood (REML) method was used for estimating the between-study variance Tau squared.<sup>5</sup> Study effects for VE were pooled by applying the inverse variance method, while the pooled RR for safety outcomes was calculated by weighting the study effects with the Mantel-Haenszel method. We used the Hartung-Knapp adjustment for random-effects meta-analyses<sup>6,7</sup> with 3 or more studies and, as ad hoc correction, used the 95% CI of the classic random-effects model or the Hartung-Knapp meta-analysis, whichever was wider.<sup>8</sup>

We specified the following subgroup analyses in the protocol anticipating that many of them would not be feasible due to the lack of data: vaccine type; product; incomplete / complete / booster dosing regimen; age group (e.g., 0-4 years vs. 5-11 years); sex (female vs. male); location (geographical region); baseline immunity (seropositive vs. seronegative) through natural infection, or after basic vaccination for booster-vaccination studies; risk groups (e.g., for immunocompromised participants); concomitant treatments (e.g., B-cell depleting therapies). Prespecified sensitivity analyses included risk of bias (e.g., low risk of bias vs. unclear and high risk of bias studies with the same study design); study design (prospective vs. retrospective); type of publication: peer-reviewed vs. other publication formats (e.g. preprint articles, letters); random-effects vs. fixed-effect model meta-analysis; and exclusion of studies with inexplicably high or low effects.

We intended to explore potential publication bias for outcomes with  $\geq 10$  included studies through investigation of funnel plot asymmetry and by conducting a linear regression test according to the Cochrane Handbook<sup>9</sup>. However, this was not possible as we included a maximum of 6 studies per outcome in meta-analysis.

### **Certainty of evidence (GRADE)**

The certainty of evidence (CoE) was assessed using the GRADE (Grading of Recommendations Assessment, Development and Evaluation) approach.<sup>10</sup>

GRADE considers five domains (risk of bias, consistency of effect, imprecision, indirectness and publication bias) in addition to the consideration of the underlying study design to rate the certainty of evidence. In accordance with the GRADE guidelines on rating the certainty of evidence for NRSIs, we started with a high CoE for outcomes assessed with ROBINS-I.<sup>11</sup>

For each of the considered domains we downgrade our certainty by 1 level, in case of serious concerns, or by 2 levels in case of very serious concerns, resulting in the overall rating of high, moderate, low or very low for each evaluated outcome.<sup>10</sup>



## Study overview

### List of included studies

| Nr. | Author of main publication             | Reference(s)                                                                                                                                                                                                                                                                                                                                                                                                                                                                                                                                                                                                                                                                                                                                                                                        |
|-----|----------------------------------------|-----------------------------------------------------------------------------------------------------------------------------------------------------------------------------------------------------------------------------------------------------------------------------------------------------------------------------------------------------------------------------------------------------------------------------------------------------------------------------------------------------------------------------------------------------------------------------------------------------------------------------------------------------------------------------------------------------------------------------------------------------------------------------------------------------|
| 1.  | Amir et al, 2023                       | Amir O, Goldberg Y, Mandel M, et al. Initial protection against Omicron in children and adolescents by BNT162b2 in Israel: an observational study. <i>Lancet Infect Dis.</i> 2023 Jan;23(1):67-73. doi: 10.1016/S1473-3099(22)00527-8. Epub 2022 Sep 9.                                                                                                                                                                                                                                                                                                                                                                                                                                                                                                                                             |
| 2.  | Bartsch et al, 2022<br>A               | Bartsch YC, St Denis KJ, Kaplonek P, et al. SARS-CoV-2 mRNA vaccination elicits robust antibody responses in children. <i>Science translational medicine.</i> 2022, eabn9237. doi: 10.1126/scitranslmed.abn9237                                                                                                                                                                                                                                                                                                                                                                                                                                                                                                                                                                                     |
| 3.  | Bartsch et al, 2022<br>B               | Bartsch YC, Chen JW, Kang J, et al. BNT162b2 induces robust cross-variant SARS-CoV-2 immunity in children. <i>npj Vaccines.</i> 2022; 7(1):158. doi: 10.1038/s41541-022-00575-w                                                                                                                                                                                                                                                                                                                                                                                                                                                                                                                                                                                                                     |
| 4.  | Bloise et al, 2022                     | Bloise S, Marcellino A, Frascaco B, et al. Cross-Sectional Survey on BNT162b2 mRNA COVID-19 Vaccine Serious Adverse Events in Children 5 to 11 Years of Age: A Monocentric Experience. <i>Vaccines.</i> 2022; 10(8):1224. doi: 10.3390/vaccines10081224                                                                                                                                                                                                                                                                                                                                                                                                                                                                                                                                             |
| 5.  | Capponi et al, 2022                    | Capponi M, Pulvirenti F, Cinicola BL, et al. Short-Term Side Effects and SARS-CoV-2 Infection after COVID-19 Pfizer–BioNTech Vaccine in Children Aged 5–11 Years: An Italian Real-World Study. <i>Vaccines.</i> 2022; 10(7):1056. doi: 10.3390/vaccines10071056                                                                                                                                                                                                                                                                                                                                                                                                                                                                                                                                     |
| 6.  | Chantasrisawad et al, 2022             | Chantasrisawad N, Puthanakit T, Kornsitthikul K, et al. Immunogenicity to SARS-CoV-2 Omicron variant among school-aged children with 2-dose of inactivated SARS-CoV-2 vaccines followed by BNT162b2 booster. <i>Vaccine: X.</i> 2022;12, 100221. doi: 10.1016/j.jvax.2022.100221                                                                                                                                                                                                                                                                                                                                                                                                                                                                                                                    |
| 7.  | Chemaitelly et al, 2022                | Chemaitelly H, AlMukdad S, Ayoub H, et al. Covid-19 Vaccine Protection among Children and Adolescents in Qatar. <i>N Engl J Med.</i> 2022 Nov 17;387(20):1865-1876. doi: 10.1056/NEJMoa2210058. Epub 2022 Nov 2.                                                                                                                                                                                                                                                                                                                                                                                                                                                                                                                                                                                    |
| 8.  | Cinicola et al, 2022                   | Cinicola BL, Mortari, EP, Zicari AM, et al. The BNT162b2 vaccine induces humoral and cellular immune memory to SARS-CoV-2 Wuhan strain and the Omicron variant in children 5 to 11 years of age. <i>Frontiers in Immunology.</i> 2022; 13. doi:10.3389/fimmu.2022.1094727                                                                                                                                                                                                                                                                                                                                                                                                                                                                                                                           |
| 9.  | Cocchio et al, 2022                    | Cocchio S, Zabeo F, Tremolada G, et al. COVID-19 Vaccine Effectiveness against Omicron Variant among Underage Subjects: The Veneto Region’s Experience. <i>Vaccines.</i> 2022; 10(8):1362. doi: 10.3390/vaccines10081362                                                                                                                                                                                                                                                                                                                                                                                                                                                                                                                                                                            |
| 10. | Cohen-Stavi et al, 2022                | Cohen-Stavi CJ, Magen O, Barda N, et al. BNT162b2 vaccine effectiveness against Omicron in children 5 to 11 years of age. <i>New England Journal of Medicine.</i> 2022, 387(3), 227-236. doi: 10.1056/NEJMoa2205011                                                                                                                                                                                                                                                                                                                                                                                                                                                                                                                                                                                 |
| 11. | Creech et al, 2022:<br>Phase 2-3 study | Creech CB, Anderson E, Berthaud V, et al. Evaluation of mRNA-1273 Covid-19 Vaccine in Children 6 to 11 Years of Age. <i>N Engl J Med.</i> 2022;386(21):2011-23. doi:10.1056/NEJMoa2203315.                                                                                                                                                                                                                                                                                                                                                                                                                                                                                                                                                                                                          |
| 12. | Creech et al, 2022:<br>Phase 1 study   | European Medicines Agency. Assessment report on extension of marketing authorisation. Procedure No EMEA/H/C/005791/II/00412022. Available from: <a href="https://www.ema.europa.eu/en/documents/variation-report/spikevax-previously-covid-19-vaccine-moderna-h-c-5791-ii-41-epar-assessment-report-variation_en.pdf">https://www.ema.europa.eu/en/documents/variation-report/spikevax-previously-covid-19-vaccine-moderna-h-c-5791-ii-41-epar-assessment-report-variation_en.pdf</a> .<br><br>ModernaTX Inc. A Study to Evaluate Safety and Effectiveness of mRNA-1273 COVID-19 Vaccine in Healthy Children Between 6 Months of Age and Less Than 12 Years of Age. Available from: <a href="https://clinicaltrials.gov/ct2/show/NCT04796896">https://clinicaltrials.gov/ct2/show/NCT04796896</a> . |
| 13. | Dorabawila et al, 2022                 | Dorabawila V, Hoefler D, Bauer UE, Bassett MT, Lutterloh E, Rosenberg ES. Effectiveness of the BNT162b2 vaccine among children 5-11 and 12-17 years in New York after the Emergence of the Omicron Variant. <i>medRxiv.</i> 2022. doi:10.1101/2022.02.25.22271454.                                                                                                                                                                                                                                                                                                                                                                                                                                                                                                                                  |
| 14. | Doucette et al, 2022                   | Doucette EJ, Gray J, Fonseca K, et al. A Longitudinal Seroepidemiology Study to Evaluate Antibody Response to SARS-CoV-2 Virus and Vaccination in Children in Calgary, Canada from July 2020 to April 2022. <i>medRxiv.</i> 2022; 11. doi: 10.1101/2022.11.02.22281665                                                                                                                                                                                                                                                                                                                                                                                                                                                                                                                              |
| 15. | Elias et al, 2023                      | Elias MD, Truong DT, Oster ME, et al. Examination of Adverse Reactions After COVID-19 Vaccination Among Patients With a History of Multisystem Inflammatory Syndrome in Children. <i>JAMA Network Open.</i> 2023;6(1):e2248987-e2248987. doi: 10.1001/jamanetworkopen.2022.48987                                                                                                                                                                                                                                                                                                                                                                                                                                                                                                                    |
| 16. | Fleming-Dutra et al, 2022              | Fleming-Dutra KE, Britton A, Shang N, et al. Association of Prior BNT162b2 COVID-19 Vaccination With Symptomatic SARS-CoV-2 Infection in Children and Adolescents During Omicron Predominance. <i>JAMA.</i> 2022;327(22):2210-9. doi:10.1001/jama.2022.7493.                                                                                                                                                                                                                                                                                                                                                                                                                                                                                                                                        |

|     |                     |                                                                                                                                                                                                                                                                                                                                                                                                                                                                                                                                                                                                                                                                                                                                                                                                                                                                                                                                                                                                                                                                                                                                                               |
|-----|---------------------|---------------------------------------------------------------------------------------------------------------------------------------------------------------------------------------------------------------------------------------------------------------------------------------------------------------------------------------------------------------------------------------------------------------------------------------------------------------------------------------------------------------------------------------------------------------------------------------------------------------------------------------------------------------------------------------------------------------------------------------------------------------------------------------------------------------------------------------------------------------------------------------------------------------------------------------------------------------------------------------------------------------------------------------------------------------------------------------------------------------------------------------------------------------|
| 17. | Fowlkes et al, 2022 | Fowlkes AL, Yoon SK, Lutrick K, et al. Effectiveness of 2-Dose BNT162b2 (Pfizer BioNTech) mRNA Vaccine in Preventing SARS-CoV-2 Infection Among Children Aged 5-11 Years and Adolescents Aged 12-15 Years - PROTECT Cohort, July 2021-February 2022. <i>MMWR Morb Mortal Wkly Rep.</i> 2022;71(11):422-8. doi:10.15585/mmwr.mm7111e1.                                                                                                                                                                                                                                                                                                                                                                                                                                                                                                                                                                                                                                                                                                                                                                                                                         |
| 18. | Girard et al, 2022  | Girard B, Tomassini JE, Deng W, et al. mRNA-1273 Vaccine-elicited Neutralization of SARS-CoV-2 Omicron in Adolescents and Children. medRxiv. 2022. doi:10.1101/2022.01.24.22269666.<br><br>Note: Subgroup analysis from Creech et al.                                                                                                                                                                                                                                                                                                                                                                                                                                                                                                                                                                                                                                                                                                                                                                                                                                                                                                                         |
| 19. | Hartono et al, 2022 | Hartono SP, Sharma HP, Bundy V, Thompkins JD, Kochis SR, Brooks JP. Safety outcomes of SARS-CoV-2 vaccination in pediatric patients with a first dose reaction history or allergy to polyethylene glycol or polysorbate. <i>The Journal of Allergy and Clinical Immunology: In Practice</i> , 10(8), 2172-2175. 2022. doi: 10.1016/j.jaip.2022.05.035                                                                                                                                                                                                                                                                                                                                                                                                                                                                                                                                                                                                                                                                                                                                                                                                         |
| 20. | Hause et al, 2022 A | Hause AM, Shay DK, Klein NP, et al. Safety of COVID-19 Vaccination in US Children Ages 5-11 Years. <i>Pediatrics</i> . 2022. doi:10.1542/peds.2022-057313.<br><br>Previous publications:<br>1) Hause AM, Baggs J, Marquez P, et al. COVID-19 Vaccine Safety in Children Aged 5-11 Years - United States, November 3-December 19, 2021. <i>MMWR Morb Mortal Wkly Rep.</i> 2021;70(5152):1755-60. doi:10.15585/mmwr.mm705152a1.<br>2) Su JR. Adverse events among children ages 5–11 years after COVID-19 vaccination: updates from v-safe and the Vaccine Adverse Event Reporting System (VAERS). ACIP meeting COVID-19 Vaccines. 2021. URL: <a href="https://stacks.cdc.gov/view/cdc/112668">https://stacks.cdc.gov/view/cdc/112668</a><br>3) Su JR. COVID-19 vaccine safety updates: Primary series in children and adolescents ages 5–11 and 12–15 years, and booster doses in adolescents ages 16–24 years. ACIP meeting COVID-19 Vaccines. 2022. URL: <a href="https://www.cdc.gov/vaccines/acip/meetings/downloads/slides-2022-01-05/02-covid-su-508.pdf">https://www.cdc.gov/vaccines/acip/meetings/downloads/slides-2022-01-05/02-covid-su-508.pdf</a> |
| 21. | Hause et al, 2022 B | Hause AM, Baggs J, Marquez P, et al. Safety Monitoring of Pfizer-BioNTech COVID-19 Vaccine Booster Doses Among Children Aged 5–11 Years — United States, May 17–July 31, 2022. <i>MMWR Morb Mortal Wkly Rep</i> 2022;71:1047–1051. doi: 10.15585/mmwr.mm7133a3                                                                                                                                                                                                                                                                                                                                                                                                                                                                                                                                                                                                                                                                                                                                                                                                                                                                                                |
| 22. | Hause et al, 2023 C | Hause AM, Marquez P, Zhang B, et al. Safety Monitoring of Bivalent COVID-19 mRNA Vaccine Booster Doses Among Children Aged 5–11 Years — United States, October 12–January 1, 2023. <i>MMWR Morb Mortal Wkly Rep</i> 2023;72:39–43. doi: 10.15585/mmwr.mm7202a5                                                                                                                                                                                                                                                                                                                                                                                                                                                                                                                                                                                                                                                                                                                                                                                                                                                                                                |
| 23. | Hu et al, 2022      | Hu M, Wong HL, Feng Y, et al. Results of safety monitoring of BNT162b2 (Pfizer-BioNTech) COVID-19 vaccine in US children aged 5-17 years. medRxiv. 2022-10. doi: 10.1101/2022.10.28.22281532                                                                                                                                                                                                                                                                                                                                                                                                                                                                                                                                                                                                                                                                                                                                                                                                                                                                                                                                                                  |
| 24. | Jang et al, 2023    | Jang EJ, Choe YJ, Kim RK, Park YJ. BNT162b2 Vaccine Effectiveness Against the SARS-CoV-2 Omicron Variant in Children Aged 5 to 11 Years. <i>JAMA pediatrics</i> . 2023. doi:10.1001/jamapediatrics.2022.5221                                                                                                                                                                                                                                                                                                                                                                                                                                                                                                                                                                                                                                                                                                                                                                                                                                                                                                                                                  |
| 25. | Joseph et al, 2022  | Joseph G, Klein E, Lustig Y, et al. Real-World Immunogenicity and Reactogenicity of Two Doses of Pfizer-BioNTech COVID-19 Vaccination in Children Aged 5-11 Years. <i>Vaccines (Basel)</i> . 2022 Nov 18;10(11):1954. doi: 10.3390/vaccines10111954.                                                                                                                                                                                                                                                                                                                                                                                                                                                                                                                                                                                                                                                                                                                                                                                                                                                                                                          |
| 26. | Kastl et al, 2022   | Kastl AJ, Weaver KN, Zhang X, et al. Humoral Immune Response and Safety of SARS-CoV-2 Vaccination in Pediatric Inflammatory Bowel Disease. <i>Am J Gastroenterol</i> . 2023 Jan 1;118(1):129-137. doi: 10.14309/ajg.0000000000002016                                                                                                                                                                                                                                                                                                                                                                                                                                                                                                                                                                                                                                                                                                                                                                                                                                                                                                                          |
| 27. | Khan et al, 2022    | Khan FL, Nguyen JL, Singh TG, et al. Estimated BNT162b2 Vaccine Effectiveness Against Infection With Delta and Omicron Variants Among US Children 5 to 11 Years of Age. <i>JAMA Netw Open</i> . 2022;5(12):e2246915. doi:10.1001/jamanetworkopen.2022.46915                                                                                                                                                                                                                                                                                                                                                                                                                                                                                                                                                                                                                                                                                                                                                                                                                                                                                                   |
| 28. | Kim et al, 2022     | Kim S, Heo Y, Seo SY, Lim DS, Cho E, Lee YK. Adverse events of the Pfizer-BioNTech COVID-19 vaccine in Korean children and adolescents aged 5 to 17 years. <i>Osong Public Health Res Perspect</i> . 2022 Oct;13(5):382-390. doi: 10.24171/j.phrp.2022.0233.                                                                                                                                                                                                                                                                                                                                                                                                                                                                                                                                                                                                                                                                                                                                                                                                                                                                                                  |
| 29. | Klein et al, 2022   | Klein NP, Stockwell MS, Demarco M, et al. Effectiveness of COVID-19 Pfizer-BioNTech BNT162b2 mRNA Vaccination in Preventing COVID-19-Associated Emergency Department and Urgent Care Encounters and Hospitalizations Among Nonimmunocompromised Children and Adolescents Aged 5-17 Years - VISION Network, 10 States, April 2021-January 2022. <i>MMWR Morb Mortal Wkly Rep.</i> 2022;71(9):352-8. doi:10.15585/mmwr.mm7109e3.                                                                                                                                                                                                                                                                                                                                                                                                                                                                                                                                                                                                                                                                                                                                |
| 30. | Leung et al, 2022 A | Leung D, Chan EYH, Mu X, et al. Humoral and Cellular Immunogenicity and Safety of 3 Doses of CoronaVac and BNT162b2 in Young Children and Adolescents with Kidney Diseases. medRxiv. 2022-09. doi: 10.1101/2022.09.14.22279916                                                                                                                                                                                                                                                                                                                                                                                                                                                                                                                                                                                                                                                                                                                                                                                                                                                                                                                                |
| 31. | Leung et al, 2023 B | Leung D, Rosa Duque JS, Yip KM, So HK, Wong W, Lau YL. Effectiveness of BNT162b2 and CoronaVac in children and adolescents against SARS-CoV-2 infection during Omicron BA. 2 wave in Hong Kong. <i>Commun Med</i> 3, 3 (2023). <a href="https://doi.org/10.1038/s43856-022-00233-1">https://doi.org/10.1038/s43856-022-00233-1</a>                                                                                                                                                                                                                                                                                                                                                                                                                                                                                                                                                                                                                                                                                                                                                                                                                            |

|     |                                     |                                                                                                                                                                                                                                                                                                                                                                                                                                                                                                                                                                                                                                                                                              |
|-----|-------------------------------------|----------------------------------------------------------------------------------------------------------------------------------------------------------------------------------------------------------------------------------------------------------------------------------------------------------------------------------------------------------------------------------------------------------------------------------------------------------------------------------------------------------------------------------------------------------------------------------------------------------------------------------------------------------------------------------------------|
| 32. | Malden et al 2022                   | Malden DE, Gee J, Glenn S, et al. Reactions following Pfizer-BioNTech COVID-19 mRNA vaccination and related healthcare encounters among 7,077 children aged 5-11 years within an integrated healthcare system. <i>Vaccine</i> . 2023 Jan 9;41(2):315-322. doi: 10.1016/j.vaccine.2022.10.079.                                                                                                                                                                                                                                                                                                                                                                                                |
| 33. | Mattiuzzi et al, 2022               | Mattiuzzi C, Lippi G. Real-world effectiveness of COVID-19 vaccination among children in Italy. <i>Int J Infect Dis</i> . 2022;122:70-1. doi:10.1016/j.ijid.2022.05.045.                                                                                                                                                                                                                                                                                                                                                                                                                                                                                                                     |
| 34. | Nygaard et al, 2022                 | Nygaard U, Holm M, Dzung KHS, et al. Risk of Myopericarditis After COVID-19 Vaccination in Danish Children Aged 5-11 Years. <i>Pediatrics</i> . 2022. doi:10.1542/peds.2022-057508.                                                                                                                                                                                                                                                                                                                                                                                                                                                                                                          |
| 35. | Piché-Renaud et al, 2022            | Piché-Renaud PP, Swayze S, Buchan S, et al. Vaccine Effectiveness of BNT162b2 Against Omicron in Children Aged 5-11 Years: A Test-Negative Design. 2022. Available from: <a href="https://papers.ssrn.com/sol3/papers.cfm?abstract_id=4176388">https://papers.ssrn.com/sol3/papers.cfm?abstract_id=4176388</a> .                                                                                                                                                                                                                                                                                                                                                                             |
| 36. | Price et al, 2022                   | Price AM, Olson SM, Newhams MM, et al. BNT162b2 Protection against the Omicron Variant in Children and Adolescents. <i>N Engl J Med</i> . 2022;386(20):1899-909. doi:10.1056/NEJMoa2202826.                                                                                                                                                                                                                                                                                                                                                                                                                                                                                                  |
| 37. | Ripabelli et al, 2022               | Ripabelli G, Sammarco ML, D'Amico A, et al. Safety of mRNA BNT162b2 COVID-19 (Pfizer-BioNTech) vaccine in children aged 5-11 years: Results from an active pharmacovigilance study in central Italy. <i>Hum Vaccin Immunother</i> . 2022 Nov 30;18(6):2126668. doi: 10.1080/21645515.2022.2126668.                                                                                                                                                                                                                                                                                                                                                                                           |
| 38. | Rosa Duque et al, 2022              | Rosa Duque JS, Leung D, Yip KM, et al. Effectiveness of BNT162b2 and CoronaVac against paediatric COVID-19-associated hospitalization and moderate-to-severe disease. <i>medRxiv</i> . 2022. doi: 10.1101/2022.09.09.22279426v1                                                                                                                                                                                                                                                                                                                                                                                                                                                              |
| 39. | Sacco et al, 2022                   | Sacco C, Del Manso M, Mateo-Urdiales A, et al. Effectiveness of BNT162b2 vaccine against SARS-CoV-2 infection and severe COVID-19 in children aged 5–11 years in Italy: a retrospective analysis of January–April, 2022. <i>The Lancet</i> . 2022; 400(10346), 97-103. doi: 10.1016/S0140-6736(22)01185-0                                                                                                                                                                                                                                                                                                                                                                                    |
| 40. | Shi et al, 2022                     | Shi DS, Whitaker M, Marks KJ, et al. Hospitalizations of Children Aged 5-11 Years with Laboratory-Confirmed COVID-19 - COVID-NET, 14 States, March 2020-February 2022. <i>MMWR Morb Mortal Wkly Rep</i> . 2022;71(16):574-81. doi:10.15585/mmwr.mm7116e1.                                                                                                                                                                                                                                                                                                                                                                                                                                    |
| 41. | Simmons et al, 2022                 | Simmons AE, Amoako A, Grima A, Murison K, Tuite A, Fisman D. Vaccine Effectiveness Against Hospitalization Among Adolescent and Pediatric SARS-CoV-2 Cases in Ontario, Canada. <i>medRxiv</i> . 2022. doi:10.1101/2022.03.24.22272919.                                                                                                                                                                                                                                                                                                                                                                                                                                                       |
| 42. | Stich et al, 2022                   | Stich M, Di Cristanziano V, Tönshoff B, et al. Humoral immune response and live-virus neutralization of the SARS-CoV-2 omicron (BA.1) variant after COVID-19 mRNA vaccination in children and young adults with chronic kidney disease. <i>Pediatr Nephrol</i> . 2022 Nov 21:1–14. doi: 10.1007/s00467-022-05806-9.                                                                                                                                                                                                                                                                                                                                                                          |
| 43. | Straus et al, 2022                  | Straus W, Urdaneta V, Esposito DB, et al. Analysis of Myocarditis Among 252 Million mRNA-1273 Recipients Worldwide. <i>Clin Infect Dis</i> . 2022 Jun 6:ciac446. doi: 10.1093/cid/ciac446.                                                                                                                                                                                                                                                                                                                                                                                                                                                                                                   |
| 44. | Suntronwong et al 2022              | Suntronwong N, Vichaiwattana P, Klinfueng S, et al. SARS-CoV-2 infection-induced seroprevalence among children and associated risk factors during pre-and omicron-dominant wave, from January 2021 through November 2022, Thailand: Longitudinal study. <i>medRxiv</i> , 2022-12. doi: 10.1101/2022.12.01.22283006                                                                                                                                                                                                                                                                                                                                                                           |
| 45. | Tan et al, 2022                     | Tan S, Cook AR, Heng D, Ong B, Lye DC, Tan KB. Effectiveness of BNT162b2 Vaccine against Omicron in Children 5 to 11 Years. <i>SSRN</i> . 2022. doi:10.2139/ssrn.4052133.                                                                                                                                                                                                                                                                                                                                                                                                                                                                                                                    |
| 46. | Walter et al, 2022: Phase 2-3 study | Walter EB, Talaat KR, Sabharwal C, et al. Evaluation of the BNT162b2 Covid-19 Vaccine in Children 5 to 11 Years of Age. <i>N Engl J Med</i> . 2022;386(1):35-46. doi:10.1056/NEJMoa2116298.                                                                                                                                                                                                                                                                                                                                                                                                                                                                                                  |
| 47. | Walter et al, 2022: Phase 1 study   | U.S. Food and Drug Administration. Vaccines and Related Biological Products Advisory Committee Meeting. FDA Briefing Document. EUA amendment request for Pfizer-BioNTech COVID-19 Vaccine for use in children 5 through 11 years of age. 2021. Available from: <a href="https://www.fda.gov/media/153447/download">https://www.fda.gov/media/153447/download</a> .<br><br>BioNTech SE. A Phase 1/2/3 Study to Evaluate the Safety, Tolerability, and Immunogenicity of an RNA Vaccine Candidate Against COVID-19 in Healthy Children and Young Adults. 2021. Available from: <a href="https://clinicaltrials.gov/ct2/show/NCT04816643">https://clinicaltrials.gov/ct2/show/NCT04816643</a> . |
| 48. | Wanlapakorn et al, 2022             | Wanlapakorn N, Kanokudom S, Phowatthanasathian H, et al. Comparison of the reactogenicity and immunogenicity between two-dose mRNA COVID-19 vaccine and inactivated followed by an mRNA vaccine in children aged 5-11 years. <i>medRxiv</i> , 2022-11. doi: 10.1101/2022.11.07.22282028                                                                                                                                                                                                                                                                                                                                                                                                      |
| 49. | Wood et al, 2022                    | Wood N, Lopez LK, Glover C, et al. Active safety surveillance of COVID-19 mRNA vaccines in children aged 5-15 years in Australia. <i>medRxiv</i> . 2022. doi: 10.1101/2022.07.19.22277827                                                                                                                                                                                                                                                                                                                                                                                                                                                                                                    |

|     |                      |                                                                                                                                                                                                                                                                                                                                              |
|-----|----------------------|----------------------------------------------------------------------------------------------------------------------------------------------------------------------------------------------------------------------------------------------------------------------------------------------------------------------------------------------|
| 50. | Yoshida et al 2022   | Yoshida M, Kobashi Y, Shimazu Y, et al. Time course of adverse reactions following BNT162b2 vaccination in healthy and allergic disease individuals aged 5–11 years and comparison with individuals aged 12–15 years: an observational and historical cohort study. <i>Eur J Pediatr.</i> 2023; 182:123–133. doi: 10.1007/s00431-022-04643-0 |
| 51. | Zambrano et al, 2022 | Zambrano LD, Newhams MM, Olson SM, et al. BNT162b2 mRNA Vaccination Against COVID-19 is Associated with Decreased Likelihood of Multisystem Inflammatory Syndrome in U.S. Children Ages 5-18 Years. <i>Clin Infect Dis.</i> 2022 Aug 4:ciac637. doi: 10.1093/cid/ciac637. Epub ahead of print.                                               |

## List of ongoing studies

| Nr. | Author of main publication               | Reference(s)                                                                                                                                                                                                                                                                                                                                                                                                                                                                                                                                                                                                                                                                                                                                                                                                                                                                                                                                                                                                                                                                                                                                                               |
|-----|------------------------------------------|----------------------------------------------------------------------------------------------------------------------------------------------------------------------------------------------------------------------------------------------------------------------------------------------------------------------------------------------------------------------------------------------------------------------------------------------------------------------------------------------------------------------------------------------------------------------------------------------------------------------------------------------------------------------------------------------------------------------------------------------------------------------------------------------------------------------------------------------------------------------------------------------------------------------------------------------------------------------------------------------------------------------------------------------------------------------------------------------------------------------------------------------------------------------------|
| 1.  | Adeloye et al, 2021                      | Adeloye D, Katikireddi SV, Woolford L, et al Uptake, effectiveness and safety of COVID-19 vaccines in children and young people in Scotland: Protocol for early pandemic evaluation and enhanced surveillance of COVID-19 (EAVE II). J Glob Health. 2021;11:05026. Available from: <a href="https://www.ncbi.nlm.nih.gov/pubmed/35003715">https://www.ncbi.nlm.nih.gov/pubmed/35003715</a> .                                                                                                                                                                                                                                                                                                                                                                                                                                                                                                                                                                                                                                                                                                                                                                               |
| 2.  | Assistance Publique - Hôpitaux de Paris  | Assistance Publique - Hôpitaux de Paris. Anti-Covid-19 Vaccine in Children With Acute Leukemia and Their Siblings. clinicaltrials.gov. 2021. Available from: <a href="https://clinicaltrials.gov/ct2/show/NCT04969601">https://clinicaltrials.gov/ct2/show/NCT04969601</a> .<br><br>Assistance Publique – Hôpitaux de Paris / DRCI Anti-Covid-19 vaccine protection in immunocompromised children (1-15 years) with acute leukemia and their siblings (= 12 years). Phase I-II trial evaluating safety and post-vaccination humoral and cellular immunogenicity / PACIFIC STUDY. clinicaltrialsregister.eu. 2021. Available from: <a href="https://www.clinicaltrialsregister.eu/ctr-search/search?query=eudract_number:2021-002966-41">https://www.clinicaltrialsregister.eu/ctr-search/search?query=eudract_number:2021-002966-41</a> .                                                                                                                                                                                                                                                                                                                                  |
| 3.  | Babu et al, 2022                         | Babu, TM, Feldstein LR, Saydah S, et al CASCADIA: A prospective community-based study protocol for assessing SARS-CoV-2 vaccine effectiveness in children and adults utilizing a remote nasal swab collection and web-based survey design. MedRxiv. 2023. 10.1101/2023.01.05.22283913                                                                                                                                                                                                                                                                                                                                                                                                                                                                                                                                                                                                                                                                                                                                                                                                                                                                                      |
| 4.  | BioNTech SE, 2021                        | BioNTech SE. Study to Evaluate Safety, Tolerability & Immunogenicity of BNT162b2 in Immunocompromised Participants ≥2 Years. clinicaltrials.gov. 2021. Available from: <a href="https://clinicaltrials.gov/ct2/show/NCT04895982">https://clinicaltrials.gov/ct2/show/NCT04895982</a>                                                                                                                                                                                                                                                                                                                                                                                                                                                                                                                                                                                                                                                                                                                                                                                                                                                                                       |
| 5.  | BioNTech SE, 2021                        | BioNTech SE. Study to Evaluate the Safety, Tolerability, and Immunogenicity of an RNA Vaccine Candidate Against COVID-19 in Healthy Children <12 Years of Age. clinicaltrials.gov. 2021. Available from: <a href="https://clinicaltrials.gov/ct2/show/NCT04816643">https://clinicaltrials.gov/ct2/show/NCT04816643</a> .<br><br>BioNTech SE A phase 1, open-label dose-finding study to evaluate safety, tolerability, and immunogenicity, and phase 2/3 placebo-controlled, observer-blinded, safety, tolerability, and immunogenicity study of a SARS-COV-2 RNA vaccine candidate against COVID-19 in health. EU Clinical Trials Register. 2021. Available from: <a href="https://www.clinicaltrialsregister.eu/ctr-search/trial/2020-005442-42/PL">https://www.clinicaltrialsregister.eu/ctr-search/trial/2020-005442-42/PL</a> .<br><br>BioNTech SE. A Phase 1/2/3 Study to Evaluate the Safety, Tolerability, and Immunogenicity of an RNA Vaccine Candidate Against COVID-19 in Healthy Children and Young Adults. clinicaltrials.gov. 2021. Available from: <a href="https://clinicaltrials.gov/show/NCT04816643">https://clinicaltrials.gov/show/NCT04816643</a> . |
| 6.  | BioNTech SE, 2022                        | BioNTech SE. A Study to Learn About Bivalent COVID-19 RNA Vaccine Candidate(s) in Healthy Infants and Children. 2022. Available from: <a href="https://clinicaltrials.gov/ct2/show/NCT05630352">https://clinicaltrials.gov/ct2/show/NCT05630352</a>                                                                                                                                                                                                                                                                                                                                                                                                                                                                                                                                                                                                                                                                                                                                                                                                                                                                                                                        |
| 7.  | Burns et al, 2021                        | Burns J, Rivers P, LeClair LB, et al Pediatric Research Observing Trends and Exposures in COVID-19 Timelines (PROTECT): Protocol for a Multisite Longitudinal Cohort Study. JMIR Res Protoc. 2022. Available from: <a href="https://www.ncbi.nlm.nih.gov/pubmed/35635842">https://www.ncbi.nlm.nih.gov/pubmed/35635842</a> .                                                                                                                                                                                                                                                                                                                                                                                                                                                                                                                                                                                                                                                                                                                                                                                                                                               |
| 8.  | Chulalongkorn University, 2022           | Chulalongkorn University. Comparison of the safety and immunogenicity of two-dose mRNA COVID-19 vaccine and inactivated followed by an mRNA vaccine in children aged 5 - 11 years. thaiclinicaltrials.org. 2022. Available from: <a href="http://www.thaiclinicaltrials.org/show/TCTR20220212001">www.thaiclinicaltrials.org/show/TCTR20220212001</a> .                                                                                                                                                                                                                                                                                                                                                                                                                                                                                                                                                                                                                                                                                                                                                                                                                    |
| 9.  | Duke University, 2022                    | Duke University. Safety of Pediatric COVID-19 Vaccination. clinicaltrials.gov. 2022. Available from: <a href="https://clinicaltrials.gov/ct2/show/NCT05157191">https://clinicaltrials.gov/ct2/show/NCT05157191</a> .                                                                                                                                                                                                                                                                                                                                                                                                                                                                                                                                                                                                                                                                                                                                                                                                                                                                                                                                                       |
| 10. | Ferrari et al, 2021                      | Ferrari L, Caldara F, Teti E, et al Systematic evaluation of the tolerability of two doses of the Pfizer-BioNTech COVID-19 vaccine (BNT162b2) in a diverse cohort of people with HIV (PWH). Hiv Medicine. 2021;22:221-2. Available from: <a href="https://pesquisa.bvsalud.org/global-literature-on-novel-coronavirus-2019-ncov/resource/pt/covidwho-1519184">https://pesquisa.bvsalud.org/global-literature-on-novel-coronavirus-2019-ncov/resource/pt/covidwho-1519184</a> .                                                                                                                                                                                                                                                                                                                                                                                                                                                                                                                                                                                                                                                                                             |
| 11. | Hospital Moinhos de Vento, 2022          | Hospital Moinhos de Vento. A Real-world Evidence Study of BNT162b2 mRNA Covid-19 Vaccine Among Children in Brazil. 2022. Available from: <a href="https://clinicaltrials.gov/ct2/show/NCT05403307">https://clinicaltrials.gov/ct2/show/NCT05403307</a>                                                                                                                                                                                                                                                                                                                                                                                                                                                                                                                                                                                                                                                                                                                                                                                                                                                                                                                     |
| 12. | KK Women's and Children's Hospital, 2022 | KK Women's and Children's Hospital Determining Reactogenicity and Immunogenicity of Delayed COVID-19 Vaccine Schedule in Children. clinicaltrials.gov. 2022. Available from: <a href="https://clinicaltrials.gov/show/NCT05329064">https://clinicaltrials.gov/show/NCT05329064</a> .<br><br>KK Women's and Children's Hospital A Single Arm Phase-IV Study to Determine Reactogenicity and Immunogenicity of Delayed COVID-19 Vaccine Schedule in Children. clinicaltrials.gov. 2022. Available from: <a href="https://clinicaltrials.gov/show/NCT05329064">https://clinicaltrials.gov/show/NCT05329064</a> .                                                                                                                                                                                                                                                                                                                                                                                                                                                                                                                                                              |
| 13. | Merck Sharp & Dohme Corp, 2021           | Merck Sharp & Dohme Corp. Safety and Immunogenicity of 9-valent Human Papillomavirus (9vHPV) Vaccine Coadministered With Messenger Ribonucleic Acid (mRNA)-1273 Severe Acute Respiratory                                                                                                                                                                                                                                                                                                                                                                                                                                                                                                                                                                                                                                                                                                                                                                                                                                                                                                                                                                                   |

|     |                                                     |                                                                                                                                                                                                                                                                                                                                                                                                                                            |
|-----|-----------------------------------------------------|--------------------------------------------------------------------------------------------------------------------------------------------------------------------------------------------------------------------------------------------------------------------------------------------------------------------------------------------------------------------------------------------------------------------------------------------|
|     |                                                     | Syndrome Coronavirus 2 (SARS-CoV-2) Vaccine (V503-076). clinicaltrials.gov. 2021. Available from: <a href="https://clinicaltrials.gov/ct2/show/NCT05119855">https://clinicaltrials.gov/ct2/show/NCT05119855</a> .                                                                                                                                                                                                                          |
| 14. | ModernaTx Inc, 2021                                 | ModernaTx Inc. A Study to Evaluate Safety and Effectiveness of mRNA-1273 COVID-19 Vaccine in Healthy Children Between 6 Months of Age and Less Than 12 Years of Age. clinicaltrials.gov. 2021. Available from: <a href="https://clinicaltrials.gov/show/NCT04796896">https://clinicaltrials.gov/show/NCT04796896</a> .                                                                                                                     |
| 15. | ModernaTx, Inc., 2022                               | ModernaTx, Inc. A Study to Evaluate Safety and Effectiveness of mRNA-1273 COVID-19 Vaccine in Healthy Children Between 6 Months of Age and Less Than 12 Years of Age. 2022. Available from: <a href="https://clinicaltrials.gov/ct2/show/NCT04796896">https://clinicaltrials.gov/ct2/show/NCT04796896</a>                                                                                                                                  |
| 16. | Murdoch Childrens Research Institute, 2021          | Murdoch Childrens Research Institute. Investigating COVID-19 Vaccine Immunity in Children in the Melbourne Infant Study of BCG for Allergy and Infection Reduction. clinicaltrials.gov. 2021. Available from: <a href="https://clinicaltrials.gov/show/NCT05168709">https://clinicaltrials.gov/show/NCT05168709</a> .                                                                                                                      |
| 17. | National Vaccine Institute, 2022                    | National Vaccine Institute. Safety and Immunogenicity of SARS-CoV-2 mRNA vaccine platform in Thai children aged 5-11 years. thaiclinicaltrials.org. 2022. Available from: <a href="http://www.thaiclinicaltrials.org/show/TCTR20220125002">www.thaiclinicaltrials.org/show/TCTR20220125002</a> .                                                                                                                                           |
| 18. | National Vaccine Institute, 2022                    | National Vaccine Institute. Immunogenicity and safety of the booster dose with SARS-CoV-2 mRNA vaccine following fully immunized with inactivated vaccine in Thai children aged 5-11 years for COVID-19 prevention. thaiclinicaltrials.org. 2022. Available from: <a href="http://www.thaiclinicaltrials.org/show/TCTR20220330001">www.thaiclinicaltrials.org/show/TCTR20220330001</a> .                                                   |
| 19. | Pfizer, 2022                                        | Pfizer. Study of Myo/Pericarditis Associated With COMIRNATY (Vaccine to Prevent COVID-19) in Persons <21 Years of Age. clinicaltrials.gov. 2022. Available from: <a href="https://clinicaltrials.gov/show/NCT05295290">https://clinicaltrials.gov/show/NCT05295290</a> .                                                                                                                                                                   |
| 20. | Princess Máxima Center for Pediatric Oncology, 2021 | Princess Máxima Center for Pediatric Oncology. Monitoring response on COVID-19 vaccination in children with cancer. clinicaltrialsregister.eu. 2021. Available from: <a href="https://pesquisa.bvsalud.org/global-literature-on-novel-coronavirus-2019-ncov/resource/en/ictrp-EUCTR2021-003388-90-NL">https://pesquisa.bvsalud.org/global-literature-on-novel-coronavirus-2019-ncov/resource/en/ictrp-EUCTR2021-003388-90-NL</a> .         |
| 21. | Rabin Medical Center, 2021                          | Rabin Medical Center. SARS-CoV-2 Antibody Response in Children Aged 5-11 Years Following Vaccination. clinicaltrials.gov. 2021. Available from: <a href="https://clinicaltrials.gov/ct2/show/NCT05175989">https://clinicaltrials.gov/ct2/show/NCT05175989</a> .                                                                                                                                                                            |
| 22. | Program Management Unit for Competitiveness, 2022   | Program Management Unit for Competitiveness. Phase 1/2 double-blinded study to Evaluate Adverse Events and Antibody level, Cell-Mediated Immune Response and Immune Response Against SARS-CoV-2 Variants after COVID-19 Vaccination in Thai Children and Adolescents. thaiclinicaltrials.org. 2022. Available from: <a href="http://www.thaiclinicaltrials.org/show/TCTR20220406002">www.thaiclinicaltrials.org/show/TCTR20220406002</a> . |
| 23. | Rigshospitalet Denmark, 2022                        | Rigshospitalet Denmark. Myopericarditis After mRNA COVID-19 Vaccination in Children 5-11 Years Old. clinicaltrials.gov. 2022. Available from: <a href="https://clinicaltrials.gov/show/NCT05186571">https://clinicaltrials.gov/show/NCT05186571</a> .                                                                                                                                                                                      |
| 24. | The University of Hong Kong, 2022                   | The University of Hong Kong. Covid-19 Vaccination in Adolescents and Children. clinicaltrials.gov. 2021. Available from: <a href="https://clinicaltrials.gov/show/NCT04800133">https://clinicaltrials.gov/show/NCT04800133</a> .                                                                                                                                                                                                           |
| 25. | University Medical Center Utrecht, 2021             | University Medical Center Utrecht. Effectivity of COVID-19 vaccination in people with Down syndrome. clinicaltrialsregister.eu. 2021. Available from: <a href="https://www.clinicaltrialsregister.eu/ctr-search/trial/2021-002613-34/NL">https://www.clinicaltrialsregister.eu/ctr-search/trial/2021-002613-34/NL</a> .                                                                                                                    |
| 26. | University of Bologna, 2021                         | University of Bologna. Monitoring COVID-19 Vaccination Response in Fragile Populations. clinicaltrials.gov. 2021. Available from: <a href="https://clinicaltrials.gov/ct2/show/NCT05222139">https://clinicaltrials.gov/ct2/show/NCT05222139</a> .                                                                                                                                                                                          |

## List of studies awaiting classification

Studies awaiting classification were those that nearly met inclusion criteria, but relevant information was missing to fully determine eligibility (e.g. with missing subgroup data for our age-group of interest), or those that may become eligible for future versions of this review (e.g. studies using COVID-19 vaccines in the relevant age-group, however without approval in the EU).

| Nr. | Author of main publication                | Reference(s)                                                                                                                                                                                                                                                                                                                                                                                                                                                                                                                                                                                                                                                                                       | Reason                              |
|-----|-------------------------------------------|----------------------------------------------------------------------------------------------------------------------------------------------------------------------------------------------------------------------------------------------------------------------------------------------------------------------------------------------------------------------------------------------------------------------------------------------------------------------------------------------------------------------------------------------------------------------------------------------------------------------------------------------------------------------------------------------------|-------------------------------------|
| 1.  | Bharat Biotech International L, 2021      | Bharat Biotech International L. COVAXIN in a Pediatric Cohort. <a href="https://www.clinicaltrials.gov">clinicaltrials.gov</a> . 2021. Available from: <a href="https://www.clinicaltrials.gov/ct2/show/NCT04918797">https://www.clinicaltrials.gov/ct2/show/NCT04918797</a> .                                                                                                                                                                                                                                                                                                                                                                                                                     | Vaccine not approved in EU          |
| 2.  | Biological E Limited, 2021                | Biological E Limited. Biological E's CORBEVAX vaccine clinical study for protection against Covid-19 disease in children. Clinical Trials Registry - India. 2021. Available from: <a href="http://www.ctri.nic.in/Clinicaltrials/pmaindet2.php?trialid=60393">http://www.ctri.nic.in/Clinicaltrials/pmaindet2.php?trialid=60393</a> .                                                                                                                                                                                                                                                                                                                                                              | Vaccine not approved in EU          |
| 3.  | Brumels K, 2022                           | Brumels K, Jensen-Bender W. Pharmacology Focus: Pfizer-BioNTech's COVID-19 Vaccine for Children 5 to 11 Years of Age. <i>S D Med</i> . 2022;75(1):36-7. Available from: <a href="https://www.ncbi.nlm.nih.gov/pubmed/35015942">https://www.ncbi.nlm.nih.gov/pubmed/35015942</a> .                                                                                                                                                                                                                                                                                                                                                                                                                  | No full text available              |
| 4.  | CanSino Biologics I, Ab, 2021             | CanSino Biologics I, Ab - This is an international multicenter s-a, open-label study to evaluate the i, responses, safety profiles of children aged y, adolescents aged y, et al A Study to Evaluate the Safety and Immunogenicity of a 2-dose Regimen With Ad5-nCoV and Ad5-nCoV-IH in Children and Adolescents Aged 6-17 Years. <a href="https://clinicaltrials.gov">clinicaltrials.gov</a> . 2021. Available from: <a href="https://clinicaltrials.gov/ct2/show/NCT05169008">https://clinicaltrials.gov/ct2/show/NCT05169008</a> .                                                                                                                                                              | Vaccine not approved in EU          |
| 5.  | Center for Genetic E, Biotechnology, 2021 | Center for Genetic E, Biotechnology. Evaluation of the safety and immunogenicity of the vaccine candidate "ABDALA" in children and adolescents. <i>RPCEC</i> . 2021. Available from: <a href="https://rpcec.sld.cu/en/trials/RPCEC00000381-En">https://rpcec.sld.cu/en/trials/RPCEC00000381-En</a> .                                                                                                                                                                                                                                                                                                                                                                                               | Vaccine not approved in EU          |
| 6.  | Chantasrisawad et al, 2022                | Chantasrisawad N, Puthanakit T, Kornsitthikul K, et al Immunogenicity to SARS-CoV-2 Omicron variant among school-aged children with 2-dose of inactivated SARS-CoV-2 vaccines followed by BNT162b2 booster. <i>Vaccine: X</i> . 2022. 12, 100221. Available from: <a href="https://www.sciencedirect.com/science/article/pii/S259013622200081X">https://www.sciencedirect.com/science/article/pii/S259013622200081X</a>                                                                                                                                                                                                                                                                            | Vaccine not approved in EU          |
| 7.  | Children's Oncology Group, 2022           | Children's Oncology Group. Evaluation of Immunologic Response Following COVID-19 Vaccination in Children, Adolescents and Young Adults With Cancer. <a href="https://clinicaltrials.gov">clinicaltrials.gov</a> . 2022. Available from: <a href="https://clinicaltrials.gov/ct2/show/NCT05228275">https://clinicaltrials.gov/ct2/show/NCT05228275</a> .                                                                                                                                                                                                                                                                                                                                            | Type of assessed vaccine(s) unclear |
| 8.  | Cinnagen, 2022                            | Cinnagen. Immunogenicity and Safety of the SpikoGen COVID-19 Vaccine in Children Aged 5 to <12 Years and 12 to <18 Years Compared With Adults Aged 18 to 40 Years. <a href="https://clinicaltrials.gov">clinicaltrials.gov</a> . 2022. Available from: <a href="https://clinicaltrials.gov/ct2/show/NCT05231590">https://clinicaltrials.gov/ct2/show/NCT05231590</a> .<br><br>CinnaGen Company. Comparison of immunogenicity and safety of SpikoGen vaccine in children aged 5 to 12 years, adolescents aged 12 to 18 years and adults aged 18 to 40 years. Iranian Registry of Clinical Trials. 2021. Available from: <a href="http://en.irct.ir/trial/60331">http://en.irct.ir/trial/60331</a> . | Vaccine not approved in EU          |
| 9.  | Cinza-Estévez et al, 2022                 | Cinza-Estévez Z, Resik-Aguirre S, Figueroa-Baile NL, et al Immunogenicity and Safety Assessment of a SARS-CoV-2 Recombinant Spike RBD Protein Vaccine (Abdala) in Paediatric Ages 3 to 18 Years Old: A Double-Blinded, Multicentre, Randomised, Phase 1/2 Clinical Trial (ISMAELILLO Study). 2022. Available from: <a href="https://papers.ssrn.com/sol3/papers.cfm?abstract_id=4304730">https://papers.ssrn.com/sol3/papers.cfm?abstract_id=4304730</a>                                                                                                                                                                                                                                           | Vaccine not approved in EU          |
| 10. |                                           | Clover Biopharmaceuticals AUSPL. Safety and Immunogenicity of SCB-2019 in Children <18 Years of Age. <a href="https://clinicaltrials.gov">clinicaltrials.gov</a> . 2022. Available from: <a href="https://www.clinicaltrials.gov/ct2/show/NCT05193279">https://www.clinicaltrials.gov/ct2/show/NCT05193279</a> .                                                                                                                                                                                                                                                                                                                                                                                   | Vaccine not approved in EU          |

|     |                                            |                                                                                                                                                                                                                                                                                                                                                                                                                                                                                                                                                                                                                                                                                                                                                                                                                                                                                                                                                                                                                                                                                                                                                                                                                                                            |                                         |
|-----|--------------------------------------------|------------------------------------------------------------------------------------------------------------------------------------------------------------------------------------------------------------------------------------------------------------------------------------------------------------------------------------------------------------------------------------------------------------------------------------------------------------------------------------------------------------------------------------------------------------------------------------------------------------------------------------------------------------------------------------------------------------------------------------------------------------------------------------------------------------------------------------------------------------------------------------------------------------------------------------------------------------------------------------------------------------------------------------------------------------------------------------------------------------------------------------------------------------------------------------------------------------------------------------------------------------|-----------------------------------------|
| 11. | Dailey et al, 2022                         | Dailey J, Kozhaya L, Dogan M, et al Antibody Responses to SARS-CoV-2 After Infection or Vaccination in Children and Young Adults With Inflammatory Bowel Disease. <i>Inflamm Bowel Dis.</i> 2022;28(7):1019-26. Available from: <a href="https://www.medrxiv.org/content/10.1101/2021.06.12.21258810v1">https://www.medrxiv.org/content/10.1101/2021.06.12.21258810v1</a> .                                                                                                                                                                                                                                                                                                                                                                                                                                                                                                                                                                                                                                                                                                                                                                                                                                                                                | Results of age groups mixed in preprint |
| 12. | Erasmus Medical Center, 2021               | Erasmus Medical Center. COVID-19 Antibody Responses In Cystic Fibrosis. <i>clinicaltrials.gov</i> . 2021. Available from: <a href="https://clinicaltrials.gov/ct2/show/NCT05217784">https://clinicaltrials.gov/ct2/show/NCT05217784</a> .<br><br>Rabin Medical Center. COVID-19 Antibody Responses in Cystic Fibrosis (CAR-CF). <i>clinicaltrials.gov</i> . 2022. Available from: <a href="https://clinicaltrials.gov/ct2/show/NCT04992234">https://clinicaltrials.gov/ct2/show/NCT04992234</a> .<br><br>Universitätsklinikum Köln. Covid-19 Antibody Responses in Cystic Fibrosis. <i>clinicaltrials.gov</i> . 2021. Available from: <a href="https://clinicaltrials.gov/ct2/show/NCT05012306">https://clinicaltrials.gov/ct2/show/NCT05012306</a> .<br><br>University Hospital Motol. COVID-19 Antibody Responses in Cystic Fibrosis. <i>clinicaltrials.gov</i> . 2021. Available from: <a href="https://clinicaltrials.gov/ct2/show/NCT05052294">https://clinicaltrials.gov/ct2/show/NCT05052294</a> .<br><br>Vastra Gotaland Region. COVID-19 Antibody Responses in Cystic Fibrosis. <i>clinicaltrials.gov</i> . 2021. Available from: <a href="https://clinicaltrials.gov/ct2/show/NCT04992234">https://clinicaltrials.gov/ct2/show/NCT04992234</a> . | Type of assessed vaccine(s) unclear     |
| 13. | Federal University of Espirito Santo, 2022 | Federal University of Espirito Santo. Efficacy, Immunogenicity and Safety of Inactivated Vaccine (Coronavac) Against SARS-COV2 in Children and Adolescents. <i>clinicaltrials.gov</i> . 2022. Available from: <a href="https://clinicaltrials.gov/ct2/show/NCT04992260">https://clinicaltrials.gov/ct2/show/NCT04992260</a> .                                                                                                                                                                                                                                                                                                                                                                                                                                                                                                                                                                                                                                                                                                                                                                                                                                                                                                                              | Vaccine not approved in EU              |
| 14. | Fernandes et al, 2022                      | Fernandes EG, Lopez-Lopes GIS, Silva VO, et al Safety and immunogenicity of an inactivated SARS-CoV-2 vaccine (CoronaVac) in inadvertently vaccinated healthy children. <i>Rev Inst Med Trop Sao Paulo.</i> 2021;63:e83. Available from: <a href="https://www.scielo.br/j/rimtsp/a/m8pRZSBYWvLzz9LpWn7wmDR/?lang=en">https://www.scielo.br/j/rimtsp/a/m8pRZSBYWvLzz9LpWn7wmDR/?lang=en</a> .                                                                                                                                                                                                                                                                                                                                                                                                                                                                                                                                                                                                                                                                                                                                                                                                                                                               | Vaccine not approved in EU              |
| 15. | Finlay Vaccine I, 2021                     | Finlay Vaccine I. SOBERANA PLUS PEDIATRIA. Cuban Registry of Clinical Trials. 2021. Available from: <a href="https://rpcec.sld.cu/en/trials/RPCEC00000391-En">https://rpcec.sld.cu/en/trials/RPCEC00000391-En</a> .                                                                                                                                                                                                                                                                                                                                                                                                                                                                                                                                                                                                                                                                                                                                                                                                                                                                                                                                                                                                                                        | Vaccine not approved in EU              |
| 16. | Finlay Vaccine I, 2021                     | Finlay Vaccine I. SOBERANA PEDIATRIA. Cuban Registry of Clinical Trials. 2021. Available from: <a href="https://rpcec.sld.cu/en/trials/RPCEC00000374-En">https://rpcec.sld.cu/en/trials/RPCEC00000374-En</a> .                                                                                                                                                                                                                                                                                                                                                                                                                                                                                                                                                                                                                                                                                                                                                                                                                                                                                                                                                                                                                                             | Vaccine not approved in EU              |
| 17. | Florentino et al, 2022                     | Florentino PTV, Alves FJO, Cerqueira-Silva T, et al Vaccine effectiveness of CoronaVac against COVID-19 among children in Brazil during the Omicron period. <i>Nat Commun</i> 13, 4756 (2022). <a href="https://doi.org/10.1038/s41467-022-32524-5">https://doi.org/10.1038/s41467-022-32524-5</a> .<br><br>Florentino PTV, Alves FJO, Cerqueira-Silva T, et al Vaccine effectiveness of CoronaVac against symptomatic and severe COVID-19 among children in Brazil during the Omicron period (preprint). <i>Research Square.</i> 2022. Available from: <a href="https://www.researchsquare.com/article/rs-1604882/v1">https://www.researchsquare.com/article/rs-1604882/v1</a> .                                                                                                                                                                                                                                                                                                                                                                                                                                                                                                                                                                          | Vaccine not approved in EU              |
| 18. | Gomez et al, 2022                          | Gomez RP, Delgado YR, Iriarte CR, et al Open label phase I/II clinical trial and predicted efficacy of SARS-CoV-2 RBD protein vaccines SOBERANA 02 and SOBERANA Plus in children. <i>medRxiv.</i> 2022. Available from: <a href="https://medrxiv.org/cgi/content/short/2022.03.03.22271313">https://medrxiv.org/cgi/content/short/2022.03.03.22271313</a> .                                                                                                                                                                                                                                                                                                                                                                                                                                                                                                                                                                                                                                                                                                                                                                                                                                                                                                | Vaccine not approved in EU              |
| 19. | Gonzalez et al, 2022                       | González S, Olszevicki S, Gaiano A, et al Effectiveness of BBIBP-CorV, BNT162b2 and mRNA-1273 vaccines against hospitalisations among children and adolescents during the Omicron outbreak in Argentina: A retrospective cohort study. <i>Lancet Reg Health Am.</i> 2022 Sep;13:100316. doi: 10.1016/j.lana.2022.100316. Epub 2022 Jul 16.<br><br>Gonzalez S, Olszevicki S, Gaiano A, et al Effectiveness of BBIBP-CorV, BNT162b2 and mRNA-1273 Vaccines Against Hospitalisations Among Children and Adolescents During the Omicron Outbreak in Argentina. <i>SSRN.</i> 2022. Available from: <a href="https://papers.ssrn.com/sol3/papers.cfm?abstract_id=4087375">https://papers.ssrn.com/sol3/papers.cfm?abstract_id=4087375</a> .                                                                                                                                                                                                                                                                                                                                                                                                                                                                                                                      | Vaccine not approved in EU              |
| 20. | Greish et al, 2022                         | Greish K, Alawadhi A, Jaradat A, et al Safety and Immunogenicity of COVID-19 BBIBP-CorV Vaccine in Children 3-12 Years Old. <i>Vaccines (Basel).</i> 2022;10(4). Available from: <a href="https://www.mdpi.com/2076-393X/10/4/586/htm">https://www.mdpi.com/2076-393X/10/4/586/htm</a> .                                                                                                                                                                                                                                                                                                                                                                                                                                                                                                                                                                                                                                                                                                                                                                                                                                                                                                                                                                   | Vaccine not approved in EU              |



|     |                                         |                                                                                                                                                                                                                                                                                                                                                                                                                                                                                                                                                                                                                                                                                                                                                                                                                                                |                            |
|-----|-----------------------------------------|------------------------------------------------------------------------------------------------------------------------------------------------------------------------------------------------------------------------------------------------------------------------------------------------------------------------------------------------------------------------------------------------------------------------------------------------------------------------------------------------------------------------------------------------------------------------------------------------------------------------------------------------------------------------------------------------------------------------------------------------------------------------------------------------------------------------------------------------|----------------------------|
| 21. | Gunale et al 2023                       | Gunale B, Kapse D, Kar S, et al A Phase 2/3 observer-blind, randomized, controlled study to determine the safety and immunogenicity of SARS-CoV-2 recombinant spike protein vaccine in Indian children and adolescents aged 2 to 17 years. <i>medRxiv</i> , 2023-01. Available from: <a href="https://www.medrxiv.org/content/10.1101/2023.01.03.23284130v2">https://www.medrxiv.org/content/10.1101/2023.01.03.23284130v2</a>                                                                                                                                                                                                                                                                                                                                                                                                                 | Vaccine not approved in EU |
| 22. | Han et al, 2021                         | Han B, Song Y, Li C, et al Safety, tolerability, and immunogenicity of an inactivated SARS-CoV-2 vaccine (CoronaVac) in healthy children and adolescents: a double-blind, randomised, controlled, phase 1/2 clinical trial <i>Lancet Infect Dis</i> . 2021;21(12):1645-53. Available from: <a href="https://www.ncbi.nlm.nih.gov/pubmed/34197764">https://www.ncbi.nlm.nih.gov/pubmed/34197764</a> .<br><br>Han B, Song Y, Li C, et al Safety, Tolerability and Immunogenicity of an Inactivated SARS-CoV-2 Vaccine (CoronaVac) in Healthy Children and Adolescents: A Randomised, Double-Blind, and Placebo-Controlled, Phase 1/2 Clinical Trial <i>SSRN Electronic Journal</i> 2021. Available from: <a href="https://papers.ssrn.com/sol3/papers.cfm?abstract_id=3820545">https://papers.ssrn.com/sol3/papers.cfm?abstract_id=3820545</a> . | Vaccine not approved in EU |
| 23. | Hause et al, 2022                       | Hause AM, Baggs J, Marquez P, et al Safety Monitoring of Pfizer-BioNTech COVID-19 Vaccine Booster Doses Among Children Aged 5–11 Years — United States, May 17–July 31, 2022. <i>MMWR Morb Mortal Wkly Rep</i> 2022;71:1047–1051. doi: <a href="http://dx.doi.org/10.15585/mmwr.mm7133a3">http://dx.doi.org/10.15585/mmwr.mm7133a3</a> .                                                                                                                                                                                                                                                                                                                                                                                                                                                                                                       | Vaccine not approved in EU |
| 24. | Instituto Finlay de Vacunas, 2021       | Instituto Finlay de Vacunas. SOBERANA PEDIATRIA CLINICA 1. Cuban Registry of Clinical Trials. 2021. Available from: <a href="https://rpec.sld.cu/en/trials/RPECEC0000384-En">https://rpec.sld.cu/en/trials/RPECEC0000384-En</a> .                                                                                                                                                                                                                                                                                                                                                                                                                                                                                                                                                                                                              | Vaccine not approved in EU |
| 25. | Janssen Vaccines Prevention B. V., 2021 | Janssen Vaccines Prevention B. V. A Randomized, Double-blind, Placebo-controlled, Phase 2/3 Study to Evaluate the Safety, Reactogenicity, and Immunogenicity of Different Dose Levels of Ad26.COV2.S Administered as a Two-dose Regimen Followed by a Booster in Healthy Children From Birth to 1. EU Clinical Trials Register. 2021. Available from: <a href="https://www.clinicaltrialsregister.eu/ctr-search/trial/2020-005720-11/3rd">https://www.clinicaltrialsregister.eu/ctr-search/trial/2020-005720-11/3rd</a> .                                                                                                                                                                                                                                                                                                                      | Vaccine not approved in EU |
| 26. | Jara et al, 2022                        | Jara A, Undurraga EA, Flores JC, et al Effectiveness of an Inactivated SARS-CoV-2 Vaccine in Children and Adolescents: A Large-Scale Observational Study. <i>SSRN</i> . 2022. Available from: <a href="https://papers.ssrn.com/sol3/papers.cfm?abstract_id=4035405">https://papers.ssrn.com/sol3/papers.cfm?abstract_id=4035405</a> .                                                                                                                                                                                                                                                                                                                                                                                                                                                                                                          | Vaccine not approved in EU |
| 27. | Jara et al, 2022                        | Jara A, Undurraga EA, Zubizarreta JR, et al Effectiveness of CoronaVac in children 3-5 years of age during the SARS-CoV-2 Omicron outbreak in Chile. <i>Nat Med</i> . 2022. Available from: <a href="https://www.nature.com/articles/s41591-022-01874-4">https://www.nature.com/articles/s41591-022-01874-4</a> .                                                                                                                                                                                                                                                                                                                                                                                                                                                                                                                              | Vaccine not approved in EU |
| 28. | Li et al, 2022a                         | Li M, Liu Q, Wu D, et al Association of COVID-19 Vaccination and Clinical Severity of Patients Infected with Delta or Omicron Variants - China, May 21, 2021-February 28, 2022. <i>China CDC Wkly</i> . 2022;4(14):293-7. Available from: <a href="https://www.ncbi.nlm.nih.gov/pmc/articles/PMC9008265/">https://www.ncbi.nlm.nih.gov/pmc/articles/PMC9008265/</a> .                                                                                                                                                                                                                                                                                                                                                                                                                                                                          | Vaccine not approved in EU |
| 29. | Li et al, 2022b                         | Li G, Cappuccini F, Marchevsky NG, et al Safety and immunogenicity of the ChAdOx1 nCoV-19 (AZD1222) vaccine in children aged 6-17 years: a preliminary report of COV006, a phase 2 single-blind, randomised, controlled trial <i>Lancet</i> . 2022 Jun 11;399(10342):2212-2225. doi: 10.1016/S0140-6736(22)00770-X. Erratum in: <i>Lancet</i> .                                                                                                                                                                                                                                                                                                                                                                                                                                                                                                | Vaccine not approved in EU |
| 30. | Li et al, 2022c                         | Li M, Weng S, Wang Q, et al Reduced binding activity of vaccine serum to omicron receptor-binding domain. <i>Front Immunol</i> . 2022 Jul 28;13:960195. doi: 10.3389/fimmu.2022.960195.                                                                                                                                                                                                                                                                                                                                                                                                                                                                                                                                                                                                                                                        | Vaccine not approved in EU |
| 31. | Lu et al, 2022                          | Lu Q, Wang YY, Wang QH, et al Safety of inactivated COVID-19 vaccine in tuberous sclerosis complex patients with epilepsy treated with rapamycin. <i>Seizure</i> . 2022;99:71-4. Available from: <a href="https://www.seizure-journal.com/article/S1059-1311(22)00114-5/fulltext">https://www.seizure-journal.com/article/S1059-1311(22)00114-5/fulltext</a> .                                                                                                                                                                                                                                                                                                                                                                                                                                                                                 | Vaccine not approved in EU |
| 32. | ModernaTx, Inc, 2022                    | ModernaTx, Inc. A Study to Evaluate the Safety and Immunogenicity of the mRNA-1273.214 COVID-19 Vaccine in Healthy Children Between 6 Months to Less Than 6 Years of Age. 2022. Available from: <a href="https://clinicaltrials.gov/ct2/show/NCT05436834">https://clinicaltrials.gov/ct2/show/NCT05436834</a>                                                                                                                                                                                                                                                                                                                                                                                                                                                                                                                                  | Vaccine not approved in EU |
| 33. | Novavax, 2022                           | Novavax. Safety and Immunogenicity of NVX-CoV2373 in Children 6 Months to < 12 Years. 2022. Available from: <a href="https://clinicaltrials.gov/ct2/show/NCT05468736">https://clinicaltrials.gov/ct2/show/NCT05468736</a>                                                                                                                                                                                                                                                                                                                                                                                                                                                                                                                                                                                                                      | Vaccine not approved in EU |

|     |                                                           |                                                                                                                                                                                                                                                                                                                                                                                                                                                                                         |                                     |
|-----|-----------------------------------------------------------|-----------------------------------------------------------------------------------------------------------------------------------------------------------------------------------------------------------------------------------------------------------------------------------------------------------------------------------------------------------------------------------------------------------------------------------------------------------------------------------------|-------------------------------------|
| 34. | Puspitarani et al, 2022                                   | Puspitarani F, Sitaesmi MN, Ahmad RA. Adverse events following immunization of COVID-19 vaccine among children aged 6–11 years. <i>Frontiers in public health</i> . 2022. 10. Available from: <a href="https://www.scienceopen.com/document_file/a4b73628-77d2-42fd-a3f1-ffad9469e426/PubMedCentral/a4b73628-77d2-42fd-a3f1-ffad9469e426.pdf">https://www.scienceopen.com/document_file/a4b73628-77d2-42fd-a3f1-ffad9469e426/PubMedCentral/a4b73628-77d2-42fd-a3f1-ffad9469e426.pdf</a> | Vaccine not approved in EU          |
| 35. | Rigshospitalet Denmark, 2021                              | Rigshospitalet Denmark. Incidence of MIS-C Following SARS-CoV-2 Infection. <i>clinicaltrials.gov</i> . 2021. Available from: <a href="https://clinicaltrials.gov/ct2/show/NCT05186597">https://clinicaltrials.gov/ct2/show/NCT05186597</a> .                                                                                                                                                                                                                                            | Vaccine not approved in EU          |
| 36. | Serum Institute of India Private Limited Pune, 2021       | Serum Institute of India Private Limited Pune. The study to check the safety and immune response of (Covid-19 vaccine) COVOVAX in adults (more than 18 years of age) and pediatric population (more than 2 years and less than 17 years of age) in India. <i>Clinical Trials Registry - India</i> . 2021. Available from: <a href="http://www.ctri.nic.in/Clinicaltrials/pmaindet2.php?trialid=49327">http://www.ctri.nic.in/Clinicaltrials/pmaindet2.php?trialid=49327</a> .           | Vaccine not approved in EU          |
| 37. | Seventh Medical Center of P. L. A. General Hospital, 2022 | Seventh Medical Center of P. L. A. General Hospital Evaluate the Safety and Immunogenicity of Ad5 COVID-19 Vaccines for Booster Use in Children Aged 6-17 Years. <i>clinicaltrials.gov</i> . 2022. Available from: <a href="https://clinicaltrials.gov/ct2/show/NCT05330871">https://clinicaltrials.gov/ct2/show/NCT05330871</a> .                                                                                                                                                      | Vaccine not approved in EU          |
| 38. | Sinovac Biotech Co Ltd                                    | Sinovac Biotech Co Ltd. Lot-to-lot Consistency of an Inactivated SARS-CoV-2 Vaccine Between Different Workshops in Healthy Children Aged 3-17 Years. <i>clinicaltrials.gov</i> . 2021. Available from: <a href="https://clinicaltrials.gov/ct2/show/NCT05112913">https://clinicaltrials.gov/ct2/show/NCT05112913</a>                                                                                                                                                                    | Vaccine not approved in EU          |
| 39. | Sinovac Research Development Co Ltd, 2020                 | Sinovac Research Development Co Ltd. Safety and Immunogenicity Study of Inactivated Vaccine for Prevention of COVID-19. <i>clinicaltrials.gov</i> . 2020. Available from: <a href="https://clinicaltrials.gov/ct2/show/NCT04551547">https://clinicaltrials.gov/ct2/show/NCT04551547</a> .                                                                                                                                                                                               | Vaccine not approved in EU          |
| 40. | Sinovac Research Development Co Ltd, 2021                 | Sinovac Research Development Co Ltd. Efficacy, Immunogenicity and Safety of COVID-19 Vaccine , Inactivated in Children and Adolescents. <i>clinicaltrials.gov</i> . 2021. Available from: <a href="https://clinicaltrials.gov/ct2/show/NCT04992260">https://clinicaltrials.gov/ct2/show/NCT04992260</a> .                                                                                                                                                                               | Vaccine not approved in EU          |
| 41. | Sinovac Research Development Co Ltd, 2021                 | Sinovac Research Development Co Ltd. Safety of an Inactivated SARS-CoV-2 Vaccine for Prevention of COVID-19 in Children and Adolescents. <i>clinicaltrials.gov</i> . 2021. Available from: <a href="https://clinicaltrials.gov/ct2/show/NCT04992208">https://clinicaltrials.gov/ct2/show/NCT04992208</a> .                                                                                                                                                                              | Vaccine not approved in EU          |
| 42. | Sinovac Research Development Co Ltd, 2021                 | Sinovac Research Development Co Ltd. Safety of an Inactivated SARS-CoV-2 Vaccine (CoronaVac) in Children and Adolescents. <i>clinicaltrials.gov</i> . 2021. Available from: <a href="https://clinicaltrials.gov/ct2/show/NCT04992208">https://clinicaltrials.gov/ct2/show/NCT04992208</a> .                                                                                                                                                                                             | Vaccine not approved in EU          |
| 43. | Sinovac Research Development Co Ltd, 2022                 | Sinovac Research Development Co Ltd. Immunogenicity of an Inactivated COVID-19 Vaccine. <i>clinicaltrials.gov</i> . 2022. Available from: <a href="https://clinicaltrials.gov/ct2/show/NCT05198336">https://clinicaltrials.gov/ct2/show/NCT05198336</a> .                                                                                                                                                                                                                               | Vaccine not approved in EU          |
| 44. | Smith et al, 2021                                         | Smith D, Pollard A. A phase II study of a candidate COVID-19 vaccine in children (COV006). <i>ISRCTN registry</i> . 2021. Available from: <a href="https://www.isrctn.com/ISRCTN15638344">https://www.isrctn.com/ISRCTN15638344</a> .                                                                                                                                                                                                                                                   | Vaccine not approved in EU          |
| 45. | Soto et al, 2022                                          | Soto JA, Melo-González F, Gutierrez-Vera C, et al An inactivated SARS-CoV-2 vaccine is safe and induces humoral and cellular immunity against virus variants in healthy children and adolescents in Chile. <i>medRxiv</i> . 2022. Available from: <a href="https://medrxiv.org/cgi/content/short/2022.02.15.22270973">https://medrxiv.org/cgi/content/short/2022.02.15.22270973</a> .                                                                                                   | Vaccine not approved in EU          |
| 46. | Soto et al, 2022                                          | Soto JA, Melo-González F, Gutierrez-Vera C, et al Inactivated Vaccine-Induced SARS-CoV-2 Variant-Specific Immunity in Children. <i>Mbio</i> . 2022. 13(6), e01311-22. Available from: <a href="https://journals.asm.org/doi/full/10.1128/mbio.01311-22">https://journals.asm.org/doi/full/10.1128/mbio.01311-22</a>                                                                                                                                                                     | Vaccine not approved in EU          |
| 47. | St. Jude Children's Research Hospital, 2021               | St. Jude Children's Research Hospital Evaluating Immune Response to COVID-19 Vaccines in Patients With Cancer, Transplant or Cellular Therapy Recipients. <i>clinicaltrials.gov</i> . 2021. Available from: <a href="https://clinicaltrials.gov/ct2/show/NCT05164016">https://clinicaltrials.gov/ct2/show/NCT05164016</a> .                                                                                                                                                             | Type of assessed vaccine(s) unclear |

|     |                                             |                                                                                                                                                                                                                                                                                                                                                                                                                                                                                                                                                                                                                                                                                                                                    |                                               |
|-----|---------------------------------------------|------------------------------------------------------------------------------------------------------------------------------------------------------------------------------------------------------------------------------------------------------------------------------------------------------------------------------------------------------------------------------------------------------------------------------------------------------------------------------------------------------------------------------------------------------------------------------------------------------------------------------------------------------------------------------------------------------------------------------------|-----------------------------------------------|
| 48. | Su et al, 2022                              | Su H, Zhang X, Duan FY, Ren XQ, Yan YB, Ding Y. 接种新型冠状病毒灭活疫苗后感染Delta变异株的新型冠状病毒肺炎患儿临床特征分析 [Clinical features of children with coronavirus disease 2019 Delta variant infection after vaccination with inactivated SARS-CoV-2 vaccine]. Zhongguo Dang Dai Er Ke Za Zhi. 2022 Jul 15;24(7):742-747. Chinese. doi: 10.7499/j.issn.1008-8830.2203174.                                                                                                                                                                                                                                                                                                                                                                                   | Vaccine not approved in EU                    |
| 50. | Subhash et al, 2022                         | Subhash T, Vikram P, SubbaReddy G, et al Safety, tolerability and immunogenicity of Biological E's CORBEVAX™ vaccine in children and adolescents: A Prospective, Randomised, Double-blind, Placebo controlled, Phase-2/3 Study (preprint). medRxiv. 2022. Available from: <a href="https://doi.org/10.1101/2022.04.20.22274076">https://doi.org/10.1101/2022.04.20.22274076</a> .                                                                                                                                                                                                                                                                                                                                                  | Vaccine not approved in EU                    |
| 51. | Suntronwong et al, 2022                     | Suntronwong N, Vichaiwattana P, Klinfueng S, et al SARS-CoV-2 infection-induced seroprevalence among children and associated risk factors during pre- and omicron-dominant wave, from January 2021 through November 2022, Thailand: Longitudinal study. medRxiv, 2022-12. Available from: <a href="https://www.medrxiv.org/content/10.1101/2022.12.01.22283006v1">https://www.medrxiv.org/content/10.1101/2022.12.01.22283006v1</a>                                                                                                                                                                                                                                                                                                | Vaccine not approved in EU                    |
| 52. | Thuluva et al, 2022                         | Thuluva S, Paradkar V, Gunneri S, et al Safety, tolerability and immunogenicity of Biological E's CORBEVAX™ vaccine in children and adolescents: A prospective, randomised, double-blind, placebo controlled, phase-2/3 study. Vaccine. 2022;40(49), 7130-7140. Available from: <a href="https://www.sciencedirect.com/science/article/pii/S0264410X22013081">https://www.sciencedirect.com/science/article/pii/S0264410X22013081</a>                                                                                                                                                                                                                                                                                              | Vaccine not approved in EU                    |
| 53. | Toepfner et al, 2022                        | Toepfner N, von Meissner W, Strumann C, et al Safety of the BNT162b2 mRNA COVID-19 Vaccine in Children below 5 Years in Germany (CoVacU5): An Investigator-initiated Retrospective Cohort Study (preprint). medRxiv. 2022. Available from: <a href="https://www.medrxiv.org/content/10.1101/2022.05.17.22275005v1">https://www.medrxiv.org/content/10.1101/2022.05.17.22275005v1</a> .                                                                                                                                                                                                                                                                                                                                             | Vaccine not approved in EU for this age group |
| 54. | Trang et al, 2023                           | Trang H, Tsui J. Impacts of COVID-19 vaccination on the ocular surface microbiota, cornea, uvea, macular vasculature and vision in children. 2023. Available from: <a href="https://www.chictr.org.cn/showprojen.aspx?proj=187584">https://www.chictr.org.cn/showprojen.aspx?proj=187584</a>                                                                                                                                                                                                                                                                                                                                                                                                                                       |                                               |
| 55. | US Food and Drug Administration (FDA), 2022 | US Food and Drug Administration (FDA). FDA Briefing Document; EUA amendment request for Pfizer-BioNTech COVID-19 Vaccine for use in children 6 months through 4 years of age, 2022. Available from: <a href="https://www.fda.gov/media/159195/download">https://www.fda.gov/media/159195/download</a> .                                                                                                                                                                                                                                                                                                                                                                                                                            | Vaccine not approved in EU                    |
| 56. | US Food and Drug Administration (FDA), 2022 | US Food and Drug Administration (FDA). FDA Briefing Document: EUA amendment request for use of the Moderna COVID-19 Vaccine in children 6 months through 17 years of age, 2022. Available from: <a href="https://www.fda.gov/media/159189/download">https://www.fda.gov/media/159189/download</a> .                                                                                                                                                                                                                                                                                                                                                                                                                                | Vaccine not approved in EU                    |
| 57. | Vadrevu et al, 2022                         | Vadrevu KM, Reddy S, Jogdand H, et al Immunogenicity and reactogenicity of an inactivated SARS-CoV-2 vaccine (BBV152) in children aged 2-18 years: interim data from an open-label, non-randomised, age de-escalation phase 2/3 study. Lancet Infect Dis. 2022 Sep;22(9):1303-1312. doi: 10.1016/S1473-3099(22)00307-3. Epub 2022 Jun 16.<br><br>Vadrevu KM, Reddy S, Jogdand H, et al Immunogenicity and safety of an inactivated SARS-CoV-2 vaccine (BBV152) in children from 2 to 18 years of age: an open-label, age-de-escalation phase 2/3 study. medRxiv. 2021. Available from: <a href="https://www.medrxiv.org/content/10.1101/2021.12.28.21268468v1">https://www.medrxiv.org/content/10.1101/2021.12.28.21268468v1</a> . | Vaccine not approved in EU                    |
| 58. | Valneva Austria GmbH, 2022                  | Valneva Austria GmbH. Paediatric VLA2001-321 Study. clinicaltrials.gov. 2022. Available from: <a href="https://clinicaltrials.gov/ct2/show/NCT05298644">https://clinicaltrials.gov/ct2/show/NCT05298644</a> .                                                                                                                                                                                                                                                                                                                                                                                                                                                                                                                      | Vaccine not approved in EU                    |
| 60. | Wang et al, 2022a                           | Wang X, Chang H, Tian H, et al Epidemiological and clinical features of SARS-CoV-2 infection in children during the outbreak of Omicron variant in Shanghai, March 7-31, 2022. Influenza Other Respir Viruses. 2022 Nov;16(6):1059-1065. doi: 10.1111/irv.13044. Epub 2022 Aug 31.<br><br>Wang X, Chang H, Tian H, et al Epidemiological and clinical features of SARS-CoV-2 Infection in children during the outbreak of Omicron Variant in Shanghai, March 7-March 31, 2022. medRxiv. 2022. Available from: <a href="https://www.medrxiv.org/content/10.1101/2022.04.28.22274421v1">https://www.medrxiv.org/content/10.1101/2022.04.28.22274421v1</a> .                                                                          | Vaccine not approved in EU                    |
| 61. | Wang et al, 2022 A                          | Wang XL, Zhai J, Zou YX. [Clinical characteristics and vaccination status of SARS-CoV-2 Omicron variant infected children]. Zhonghua Er Ke Za Zhi. 2022 Jun 15;60(7):671-675. Chinese. doi: 10.3760/cma.j.cn112140-20220506-00417. Epub ahead of print.                                                                                                                                                                                                                                                                                                                                                                                                                                                                            | Vaccine not approved in EU                    |

|     |                                |                                                                                                                                                                                                                                                                                                                                                                                                                                                                       |                            |
|-----|--------------------------------|-----------------------------------------------------------------------------------------------------------------------------------------------------------------------------------------------------------------------------------------------------------------------------------------------------------------------------------------------------------------------------------------------------------------------------------------------------------------------|----------------------------|
| 62. | Wang et al, 2022 B             | Wang L, Wu Z, Ying Z, et al Safety and immunogenicity following a homologous booster dose of CoronaVac in children and adolescents. Nature communications. 2022;13(1), 6952. Available from: <a href="https://www.nature.com/articles/s41467-022-34280-y">https://www.nature.com/articles/s41467-022-34280-y</a>                                                                                                                                                      | Vaccine not approved in EU |
| 63. | Wang et al, 2022 C             | Wang Z, Fang X, Han T, et al Safety and tolerability of COVID-19 vaccine in children with epilepsy: a prospective, multicenter study. Pediatric Neurology. 2023;140, 3-8. Available from: <a href="https://www.sciencedirect.com/science/article/pii/S0887899422002570">https://www.sciencedirect.com/science/article/pii/S0887899422002570</a>                                                                                                                       |                            |
| 64. | WestVac Biopharma Co Ltd, 2021 | WestVac Biopharma Co Ltd. Phase I/II Clinical Trial of Recombinant COVID-19 Vaccine (Sf9 Cells) in Children and Adolescents. clinicaltrials.gov. 2021. Available from: <a href="https://clinicaltrials.gov/ct2/show/NCT05013983">https://clinicaltrials.gov/ct2/show/NCT05013983</a> .                                                                                                                                                                                | Vaccine not approved in EU |
| 65. | Xia et al, 2021                | Xia S, Zhang Y, Wang Y, et al Safety and immunogenicity of an inactivated COVID-19 vaccine, BBIBP-CorV, in people younger than 18 years: a randomised, double-blind, controlled, phase 1/2 trial The Lancet Infectious Diseases. 2022;22(2):196-208. Available from: <a href="https://www.thelancet.com/journals/laninf/article/PIIS1473-3099(21)00462-X/fulltext">https://www.thelancet.com/journals/laninf/article/PIIS1473-3099(21)00462-X/fulltext</a> .          | Vaccine not approved in EU |
| 66. | Xia et al, 2022                | Xia S, Duan K, Zhang Y, et al Safety and Immunogenicity of an Inactivated COVID-19 Vaccine, WIBP-CorV, in Healthy Children: Interim Analysis of a Randomized, Double-Blind, Controlled, Phase 1/2 Trial Front Immunol. 2022 Jun 24;13:898151. doi: 10.3389/fimmu.2022.898151.                                                                                                                                                                                         | Vaccine not approved in EU |
| 67. | Ye et al, 2022                 | Ye Y, Lu YM, Xu CM, et al Effects of vaccines on the viral negative conversion of children with COVID-19. Zhonghua er ke za zhi= Chinese Journal of Pediatrics. 2022. 60(12), 1302-1306. Available from: <a href="https://europepmc.org/article/med/36444434">https://europepmc.org/article/med/36444434</a>                                                                                                                                                          | Vaccine not approved in EU |
| 68. | Yi et al, 2022                 | Yi C, Zheng X, Lin K, Xiao J. Safety of inactivated COVID-19 vaccine in pediatric patients with rheumatic diseases. 2022. Available from: <a href="https://assets.researchsquare.com/files/rs-1658641/v1/39c9590a-a01e-4c7d-ac15-20168f8089d0.pdf?c=1664795941">https://assets.researchsquare.com/files/rs-1658641/v1/39c9590a-a01e-4c7d-ac15-20168f8089d0.pdf?c=1664795941</a>                                                                                       | Vaccine not approved in EU |
| 69. | Yin et al, 2022                | Yin R, Lu Q, Jiao JL, et al Characteristics and related factors of viral nucleic acid negative conversion in children infected with Omicron variant strain of SARS-CoV-2. Zhonghua Er Ke Za Zhi. 2022. 1307-1311. Available from: <a href="https://pesquisa.bvsalud.org/global-literature-on-novel-coronavirus-2019-ncov/resource/fr/covidwho-2143847">https://pesquisa.bvsalud.org/global-literature-on-novel-coronavirus-2019-ncov/resource/fr/covidwho-2143847</a> | Vaccine not approved in EU |
| 70. | Zeng et al, 2022               | Zeng M, Zhai X, Chang H, et al COVID-19 vaccine counseling and safety assessment in children and teenagers with underlying medical conditions in China: a single center study. Hum Vaccin Immunother. 2022 Nov 30;18(5):2082207. doi: 10.1080/21645515.2022.2082207. Epub 2022 Jun 27.                                                                                                                                                                                | Vaccine not approved in EU |
| 71. | Zhu et al, 2021                | Zhu F, Jin P, Zhu T, et al Safety and immunogenicity of a recombinant adenovirus type-5-vectored COVID-19 vaccine with a homologous prime-boost regimen in healthy participants aged 6 years and above: a randomised, double-blind, placebo-controlled, phase 2b trial Clin Infect Dis. 2021. Available from: <a href="https://academic.oup.com/cid/article/75/1/e783/6374123">https://academic.oup.com/cid/article/75/1/e783/6374123</a> .                           | Vaccine not approved in EU |

EU: European Union

## List of excluded studies after full-text screening

| Nr. | Reference                                                                                                                                                                                                                                                                                                                           | Exclusion reason         |
|-----|-------------------------------------------------------------------------------------------------------------------------------------------------------------------------------------------------------------------------------------------------------------------------------------------------------------------------------------|--------------------------|
| 1.  | Abbate A, Gavin J, Madanchi N, et al Fulminant myocarditis and systemic hyperinflammation temporally associated with BNT162b2 mRNA COVID-19 vaccination in two patients. <i>Int J Cardiol.</i> 2021;340:119-21. doi:10.1016/j.ijcard.2021.08.018.                                                                                   | Wrong patient population |
| 2.  | Abdel-Qader DH, Hazza Alkhatabeh I, Hayajneh W, Annab H, Al Meslamani AZ, Elmusa RA. IgA nephropathy in a pediatric patient after receiving the first dose of Pfizer-BioNTech COVID-19 vaccine. <i>Vaccine.</i> 2022;40(18):2528-30. doi:10.1016/j.vaccine.2022.03.003.                                                             | Wrong patient population |
| 3.  | Acuti Martellucci C, Flacco ME, Soldato G, et al Effectiveness of COVID-19 Vaccines in the General Population of an Italian Region before and during the Omicron Wave. <i>Vaccines (Basel).</i> 2022;10(5). doi:10.3390/vaccines10050662.                                                                                           | Wrong patient population |
| 4.  | Akgün Ö, Cakmak F, Guliyeva V, et al Humoral Response and Safety of BNT162b2 mRNA Vaccine in Children with Rheumatic Diseases under Immunomodulatory Treatment: A Preliminary Study. <i>Rheumatology (Oxford).</i> 2022. doi:10.1093/rheumatology/keac140.                                                                          | Wrong patient population |
| 5.  | Aldè M, Di Bernardino F, Ambrosetti U, et al Audiological and vestibular symptoms following SARS-CoV-2 infection and COVID-19 vaccination in children aged 5–11 years. <i>American Journal of Otolaryngology.</i> 2023. 44(1), 103669. doi: 10.1016/j.amjoto.2022.103669                                                            | Wrong outcomes           |
| 6.  | Althaus T, Landier J, Zhu F, et al The Impact of SARS-CoV-2 Vaccination and Infection on Neutralising Antibodies: A Nation-Wide Cross-Sectional Analysis. 2022. <a href="https://dx.doi.org/10.2139/ssrn.4233128">https://dx.doi.org/10.2139/ssrn.4233128</a>                                                                       | Wrong patient population |
| 7.  | Alwafi H, Naser AY, Aldhahir AM, et al COVID-19 vaccination side effects among the child age group: a large cross-sectional online based survey in Saudi Arabia. <i>BMC Infectious Diseases.</i> 2022. 22(1), 1-9. doi: 10.1186/s12879-022-07905-2                                                                                  | Wrong patient population |
| 8.  | Araujo da Silva AR, de Carvalho BRR, Esteves MM, Teixeira CH, Souza CV. Role of COVID-19 vaccinal status in admitted children during OMICRON variant circulation in Rio de Janeiro, city- Preliminary report. medRxiv. 2022. doi:10.1101/2022.02.10.22270817.                                                                       | Wrong intervention       |
| 9.  | Araujo da Silva AR, de Carvalho BRR, Esteves MM, Teixeira CH, Souza CV. Role of COVID-19 vaccinal status in admitted children during OMICRON variant circulation in Rio de Janeiro, city- Preliminary report (preprint). medRxiv. 2022. doi:10.1101/2022.02.10.22270817.                                                            | Wrong intervention       |
| 10. | Bartsch YC, Chen J, Kang J, et al BNT162b2 induces robust cross-variant SARS-CoV-2 immunity in children (preprint). medRxiv. 2022. Available from: <a href="https://www.medrxiv.org/content/10.1101/2022.05.18.22275283v1">https://www.medrxiv.org/content/10.1101/2022.05.18.22275283v1</a> .                                      | Wrong comparator         |
| 11. | Bartsch YC, St Denis KJ, Kaplonek P, et al Comprehensive antibody profiling of mRNA vaccination in children. medRxiv. 2021. Available from: <a href="https://biorxiv.org/cgi/content/short/2021.10.07.463592">https://biorxiv.org/cgi/content/short/2021.10.07.463592</a> .                                                         | Wrong intervention       |
| 12. | Belsky JA, Carroll WR, Feliciano A, Jacob SA. Side effects following COVID-19 vaccination in pediatric patients with sickle cell disease. <i>Pediatric Blood &amp; Cancer.</i> 2022. e30193. doi: 10.1002/pbc.30193                                                                                                                 | Wrong patient population |
| 13. | Bianchi S, Angi A, Passucci M, Palumbo G, Baldacci E, Testi AM. Severe Immune Thrombocytopenia (ITP) Following SARS-CoV-2 mRNA Vaccine in a Girl on Immunosuppressive Treatment and in Prolonged Stable Phase of ITP. <i>Mediterr J Hematol Infect Dis.</i> 2022;14(1):e2022011. doi:10.4084/MJHID.2022.011.                        | Wrong patient population |
| 14. | Bizjak M, Emeršič N, Barbone F, et al High incidence of multisystem inflammatory syndrome and other autoimmune diseases after SARS-CoV-2 infection compared to COVID-19 vaccination in children and adolescents in south central Europe. <i>Clinical and Experimental Rheumatology.</i> 2022. doi: 10.55563/clinexprheumatol/i112xn | Wrong patient population |
| 15. | Body A, Ahern E, Lal L, et al Protocol for SARS-CoV-2 post-vaccine surveillance study in Australian adults and children with cancer: an observational study of safety and serological and immunological response to SARS-CoV-2 vaccination (SerOzNET). <i>BMC Infect Dis.</i> 2022;22(1):70. doi:10.1186/s12879-021-07019-1.        | Wrong patient population |
| 16. | Bonzano L, Djuric O, Mancuso P, et al Incidence and Characteristics of Adverse Events after COVID-19 Vaccination in a Population-Based Programme. <i>Vaccines.</i> 2022; 10(7):1111. <a href="https://doi.org/10.3390/vaccines10071111">https://doi.org/10.3390/vaccines10071111</a>                                                | Wrong patient population |
| 17. | Bots SH, Riera Arnau J, Belitser SV, et al Myocarditis and pericarditis associated with SARS-CoV-2 vaccines: A population-based descriptive cohort and a nested self-controlled risk interval study using electronic health care data from four European countries. 2022. doi: 10.3389/fphar.2022.1038043                           | Wrong patient population |
| 18. | Boylan M, Roddy J, Lim N, Morgan R, McAdam B, Kiernan F. Recovery of a critically ill patient with COVID-19 myocarditis. <i>Ir J Med Sci.</i> 2022;191(3):1445-9. doi:10.1007/s11845-021-02681-5.                                                                                                                                   | Wrong patient population |
| 19. | Burns MD, Muir C, Atyeo C, et al Relationship between anti-spike antibodies and risk of SARS-CoV-2 infection in infants born to COVID-19 vaccinated mothers. <i>Vaccines.</i> 2022. 10(10), 1696. <a href="https://dx.doi.org/10.3390/vaccines10101696">https://dx.doi.org/10.3390/vaccines10101696</a>                             | Wrong outcomes           |
| 20. | Cahen-Peretz A, Tsaitlin-Mor L, Kam HA, et al Boosting maternal and neonatal anti-SARS-CoV-2 humoral immunity using a third mRNA vaccine dose. <i>JCI insight.</i> 2023. 8(1). <a href="https://dx.doi.org/10.1172/jci.insight.158646">https://dx.doi.org/10.1172/jci.insight.158646</a>                                            | Wrong outcomes           |
| 21. | Cari L, Fiore P, Naghavi Alhosseini M, Sava G, Nocentini G. Blood clots and bleeding events following BNT162b2 and ChAdOx1 nCoV-19 vaccine: An analysis of European data. <i>J Autoimmun.</i> 2021;122:102685. doi:10.1016/j.jaut.2021.102685.                                                                                      | Wrong patient population |
| 22. | Chadeau-Hyam M, Wang H, Eales O, et al REACT-1 study round 14: High and increasing prevalence of SARS-CoV-2 infection among school-aged children during September 2021 and vaccine effectiveness against infection in England. medRxiv. 2021. doi:10.1101/2021.10.14.21264965.                                                      | Wrong patient population |
| 23. | Chemaitelly H, Ayoub H, Coyle PV, et al Effect of BNT162b2 antigen dosage on protection against SARS-CoV-2 omicron infection. medRxiv. 2022. 2022-11. <a href="https://dx.doi.org/10.1101/2022.11.29.22282864">https://dx.doi.org/10.1101/2022.11.29.22282864</a>                                                                   | Wrong comparator         |

|     |                                                                                                                                                                                                                                                                                                                                                                                             |                          |
|-----|---------------------------------------------------------------------------------------------------------------------------------------------------------------------------------------------------------------------------------------------------------------------------------------------------------------------------------------------------------------------------------------------|--------------------------|
| 24. | Chen LL, Chua GT, Lu L, et al Omicron variant susceptibility to neutralizing antibodies induced in children by natural SARS-CoV-2 infection or COVID-19 vaccine. <i>Emerg Microbes Infect.</i> 2022;11(1):543-7. doi:10.1080/22221751.2022.2035195.                                                                                                                                         | Wrong patient population |
| 25. | Chen WC, Lin YP, Cheng CM, et al Detection of SARS-CoV-2 Neutralizing Antibodies in Vaccinated Pregnant Women and Neonates by Using a Lateral Flow Immunoassay Coupled with a Spectrum-Based Reader. <i>Biosensors.</i> 2022. 12(10), 891. <a href="https://dx.doi.org/10.3390/bios12100891">https://dx.doi.org/10.3390/bios12100891</a>                                                    | Wrong patient population |
| 26. | Chiem M, Rauova L, Diorio C, et al The Role of PF4 Antibodies in Pediatric Sars-Cov-2 Infections. <i>Blood.</i> 2021;138(Supplement 1):1004-. doi:10.1182/blood-2021-151529.                                                                                                                                                                                                                | Wrong intervention       |
| 27. | Cieslewicz A, Dudek M, Krela-Kazmierczak I, Jablęcka A, Lesiak M, Korzeniowska K. Pancreatic Injury after COVID-19 Vaccine-A Case Report. <i>Vaccines (Basel).</i> 2021;9(6). doi:10.3390/vaccines9060576.                                                                                                                                                                                  | Wrong patient population |
| 28. | Clifford S, Waight P, Hackman J, et al Effectiveness of BNT162b2 and ChAdOx1 against SARS-CoV-2 household transmission - a prospective cohort study in England. <i>medRxiv.</i> 2021. doi:10.1101/2021.11.24.21266401.                                                                                                                                                                      | Wrong patient population |
| 29. | Collignon C, Frachette C, Callot D, et al Two pediatric cases of multisystem inflammatory-like syndrome following COVID-19 vaccination. <i>Archives de Pédiatrie.</i> 2022. 29(8), 620-623. <a href="https://dx.doi.org/10.1016/j.arcped.2022.08.018">https://dx.doi.org/10.1016/j.arcped.2022.08.018</a>                                                                                   | Wrong patient population |
| 30. | Committee on Infectious D. COVID-19 Vaccines in Children and Adolescents. <i>Pediatrics.</i> 2022;149(1). doi:10.1542/peds.2021-054332.                                                                                                                                                                                                                                                     | Wrong study design       |
| 31. | Cotugno N, Franzese E, Angelino G, et al Evaluation of Safety and Immunogenicity of BNT162B2 mRNA COVID-19 Vaccine in IBD Pediatric Population with Distinct Immune Suppressive Regimens. <i>Vaccines.</i> 2022; 10(7):1109. <a href="https://doi.org/10.3390/vaccines10071109">https://doi.org/10.3390/vaccines10071109</a>                                                                | Wrong patient population |
| 32. | Crommelynck S, Thill P. Pharmacovigilance for COVID-19 vaccines: A 1-year experience in France. <i>Infectious Diseases Now.</i> 2022. 52(8), S16-S18. <a href="https://dx.doi.org/10.1016/j.idnow.2022.09.018">https://dx.doi.org/10.1016/j.idnow.2022.09.018</a>                                                                                                                           | Wrong study design       |
| 33. | Dailey J, Kozhaya L, Dogan M, et al Antibody Responses to SARS-CoV-2 after Infection or Vaccination in Children and Young Adults with Inflammatory Bowel Disease. <i>medRxiv.</i> 2021. doi:10.1101/2021.06.12.21258810.                                                                                                                                                                    | Wrong patient population |
| 34. | Das S, Tumpa NI, Khan AA, et al Relation of vaccination with severity, oxygen requirement and outcome of COVID-19 infection in Chattogram, Bangladesh. <i>medRxiv.</i> 2021. doi:10.1101/2021.06.03.21257996.                                                                                                                                                                               | Wrong patient population |
| 35. | Diaz RF, Ampuero AC, Donoso FA. Pericarditis posterior a la administración de vacuna mRNA contra COVID-19. <i>Andes pediater.</i> 2021;92(6): 973-975. Disponible en: doi:10.32641/andespediatr.v92i6.4035                                                                                                                                                                                  | Wrong patient population |
| 36. | Domínguez-Ramírez L, Solís-Tejeda I, Ayon-Aguilar J, et al Decrease in COVID-19 adverse outcomes in adults during the Delta and Omicron SARS-CoV-2 waves, after vaccination in Mexico. <i>Frontiers in public health.</i> 2022. 10. <a href="https://www.frontiersin.org/articles/10.3389/fpubh.2022.1010256/full">https://www.frontiersin.org/articles/10.3389/fpubh.2022.1010256/full</a> | Wrong study design       |
| 37. | Ella R, Reddy S, Jogdand H, et al Safety and immunogenicity clinical trial of an inactivated SARS-CoV-2 vaccine, BBV152 (a phase 2, double-blind, randomised controlled trial) and the persistence of immune responses from a phase 1 follow-up report. <i>medRxiv.</i> 2020. doi:10.1101/2020.12.21.20248643.                                                                              | Wrong patient population |
| 38. | Etemadifar M, Sedaghat N, Nouri H, et al SARS-CoV-2 serology among people with multiple sclerosis on disease-modifying therapies after BBIBP-CorV (Sinopharm) inactivated virus vaccination: Same story, different vaccine. <i>Mult Scler Relat Disord.</i> 2022;57:103417. doi:10.1016/j.msard.2021.103417.                                                                                | Wrong patient population |
| 39. | Flannery DD, Gouma S, Dhudasia MB, et al Comparison of Maternal and Neonatal Antibody Levels After COVID-19 Vaccination vs SARS-CoV-2 Infection. <i>JAMA Network Open.</i> 2022. 5(11), e2240993-e2240993. <a href="https://dx.doi.org/10.1001/jamanetworkopen.2022.40993">https://dx.doi.org/10.1001/jamanetworkopen.2022.40993</a>                                                        | Wrong setting            |
| 40. | Flaxman S, Whittaker C, Semenova E, Rashid T, Parks RM, Blenkinsop A, et al Covid-19 is a leading cause of death in children and young people ages 0-19 years in the United States. <i>medRxiv.</i> 2022. doi:10.1101/2022.05.23.22275458.                                                                                                                                                  | Wrong study design       |
| 41. | Gao F, Mallajoyula V, Arunachalam P, et al Robust T Cell Responses to the Pfizer/Biontech Vaccine Compared to Infection and Evidence of Attenuated Cd8+ T Cell Responses Due to Covid-19. 2022. <a href="https://dx.doi.org/10.2139/ssm.4173451">https://dx.doi.org/10.2139/ssm.4173451</a>                                                                                                 | Wrong patient population |
| 42. | Gazit S, Mizrahi B, Kalkstein N, et al BNT162b2 mRNA Vaccine Effectiveness Given Confirmed Exposure; Analysis of Household Members of COVID-19 Patients. <i>medRxiv.</i> 2021. doi:10.1101/2021.06.29.21259579.                                                                                                                                                                             | Wrong patient population |
| 43. | Grant R, Charmet T, Schaeffer L, et al Impact of SARS-CoV-2 Delta variant on incubation, transmission settings and vaccine effectiveness: Results from a nationwide case-control study in France. <i>Lancet Reg Health Eur.</i> 2022;13:100278. doi:10.1016/j.lanepe.2021.100278.                                                                                                           | Wrong patient population |
| 44. | Gouda N, Dimitriadou M, Sotiriou G, et al The impact of COVID-19 vaccination on glycaemic control in children and adolescents with type 1 diabetes mellitus on continuous glucose monitoring. <i>Acta Diabetol</i> 59, 1609–1614 (2022). <a href="https://doi.org/10.1007/s00592-022-01968-y">https://doi.org/10.1007/s00592-022-01968-y</a>                                                | Wrong outcomes           |
| 45. | Gulmez R, Ozbey D, Agbas A, et al Humoral and cellular immune response to SARS-CoV-2 mRNA BNT162b2 vaccine in pediatric kidney transplant recipients compared with dialysis patients and healthy children. <i>Pediatric Nephrology.</i> 2022. 1-10. <a href="https://dx.doi.org/10.1007/s00467-022-05813-w">https://dx.doi.org/10.1007/s00467-022-05813-w</a>                               | Wrong patient population |
| 46. | Halder A, Imamura H, Condon S, et al Pfizer/BioNtech BNT162b2: adverse events and insights from an Australian mass vaccination clinic for COVID-19. <i>Intern Med J.</i> 2022;52(1):121-4. doi:10.1111/imj.15623.                                                                                                                                                                           | Wrong patient population |
| 47. | Hanna C, Herrera Hernandez LP, Bu L, et al IgA nephropathy presenting as macroscopic hematuria in 2 pediatric patients after receiving the Pfizer COVID-19 vaccine. <i>Kidney Int.</i> 2021;100(3):705-6. doi:10.1016/j.kint.2021.06.032.                                                                                                                                                   | Wrong patient population |
| 48. | Hung YP, Sun KS. A case of myopericarditis with pleuritis following AstraZeneca Covid-19 vaccination. <i>QJM.</i> 2022;114(12):879-81. doi:10.1093/qjmed/hcab278.                                                                                                                                                                                                                           | Wrong patient population |
| 49. | Ibroci E, Liu X, Lieb W, et al Impact of prenatal COVID-19 vaccination on delivery and neonatal outcomes: Results from a New York City cohort. <i>Vaccine.</i> 2023. 41(3), 649-656. <a href="https://dx.doi.org/10.1016/j.vaccine.2022.09.095">https://dx.doi.org/10.1016/j.vaccine.2022.09.095</a>                                                                                        | Wrong outcomes           |
| 50. | Jain E, Donowitz JR, Aarons E, Marshall BC, Miller MP. Multisystem Inflammatory Syndrome in Children after SARS-CoV-2 Vaccination. <i>Emerg Infect Dis.</i> 2022;28(5):990-3. doi:10.3201/eid2805.212418.                                                                                                                                                                                   | Wrong patient population |

|     |                                                                                                                                                                                                                                                                                                                                                                                                                                                                                                         |                          |
|-----|---------------------------------------------------------------------------------------------------------------------------------------------------------------------------------------------------------------------------------------------------------------------------------------------------------------------------------------------------------------------------------------------------------------------------------------------------------------------------------------------------------|--------------------------|
| 51. | Jaydev F, Kumar V, Khatri J, Shahani S, Beganovic S. A Case of Autoimmune Hemolytic Anemia after the First Dose of COVID-19 mRNA-1273 Vaccine with Undetected Pernicious Anemia. <i>Case Rep Hematol.</i> 2022;2022:2036460. doi:10.1155/2022/2036460.                                                                                                                                                                                                                                                  | Wrong patient population |
| 52. | Jorgensen SC, Hernandez A, Fell D, et al Effectiveness of Maternal mRNA COVID-19 Vaccination During Pregnancy Against Delta and Omicron SARS-CoV-2 Infection and Hospitalization in Infants: A Test-Negative Design Study. 2022. <a href="https://dx.doi.org/10.2139/ssrn.4246651">https://dx.doi.org/10.2139/ssrn.4246651</a>                                                                                                                                                                          | Wrong patient population |
| 53. | Kaicker S, Martinko K, Bussel JB. Effects of COVID-19 vaccination on platelet counts and bleeding in children, adolescents, and young adults with immune thrombocytopenia. <i>Pediatric Blood &amp; Cancer.</i> 2023. 70(1), e30051. <a href="https://dx.doi.org/10.1002/pbc.30051">https://dx.doi.org/10.1002/pbc.30051</a>                                                                                                                                                                            | Wrong outcomes           |
| 54. | Karatzios C, Scuccimarrì R, Chedeville G, Basfar W, Bullard J, Stein DR. Multisystem Inflammatory Syndrome Following SARS-CoV-2 Vaccination in Two Children. <i>Pediatrics.</i> 2022. doi:10.1542/peds.2021-055956.                                                                                                                                                                                                                                                                                     | Wrong patient population |
| 55. | Keir G, Maria NI, Kirsch CFE. Unique Imaging Findings of Neurologic Phantosmia Following Pfizer-BioNTech COVID-19 Vaccination: A Case Report. <i>Top Magn Reson Imaging.</i> 2021;30(3):133-7. doi:10.1097/RMR.0000000000000287.                                                                                                                                                                                                                                                                        | Wrong patient population |
| 56. | Kildegård H, Lund LC, Hojlund M, Stensballe LG, Pottegård A. Risk of adverse events after covid-19 in Danish children and adolescents and effectiveness of BNT162b2 in adolescents: cohort study. <i>BMJ.</i> 2022;377:e068898. doi:10.1136/bmj-2021-068898.                                                                                                                                                                                                                                            | Wrong patient population |
| 57. | Kim C, Yee R, Bhatkoti R, et al COVID-19 Vaccine Provider Access and Vaccination Coverage Among Children Aged 5-11 Years - United States, November 2021-January 2022. <i>MMWR Morb Mortal Wkly Rep.</i> 2022;71(10):378-83. doi:10.15585/mmwr.mm7110a4.                                                                                                                                                                                                                                                 | Wrong outcomes           |
| 58. | Koirala A, Winkler NE, Quinn H, et al Understanding SARS-CoV-2 Delta and Omicron Variant Transmission and Vaccine Impact in Schools and Child-Care Settings in Australia. Available at SSRN 4301765. 2023. doi: 10.2139/ssrn.4301765                                                                                                                                                                                                                                                                    | Wrong patient population |
| 59. | Lai FTT, Huang L, Peng K, et al Post-Covid-19-vaccination adverse events and healthcare utilization among individuals with or without previous SARS-CoV-2 infection. <i>J Intern Med.</i> 2022;291(6):864-9. doi:10.1111/joim.13453.                                                                                                                                                                                                                                                                    | Wrong patient population |
| 60. | Larkin K, Sharma A, Drachtman R, Saluru G. Supraclavicular lymphadenopathy after COVID-19 vaccination. <i>Pediatr Blood Cancer.</i> 2022;69(5):e29516. doi:10.1002/pbc.29516.                                                                                                                                                                                                                                                                                                                           | Wrong patient population |
| 61. | Layan M, Gilboa M, Gonen T, et al Impact of BNT162b2 vaccination and isolation on SARS-CoV-2 transmission in Israeli households: an observational study. medRxiv. 2021. doi:10.1101/2021.07.12.21260377.                                                                                                                                                                                                                                                                                                | Wrong intervention       |
| 62. | Lee E, Kim K, Kim M, et al Adverse reactions to coronavirus disease 2019 vaccines in children and adolescents. <i>Allergy Asthma &amp; Respiratory Disease.</i> 2022;10(1):9-14. doi:10.4168/aard.2022.10.1.9.                                                                                                                                                                                                                                                                                          | Wrong study design       |
| 63. | Leung D, Mu X, Rosa Duque J, et al Safety and immunogenicity of 3 doses of BNT162b2 and CoronaVac in children and adults with inborn errors of immunity. <i>Authorea Preprints.</i> 2022. <a href="https://dx.doi.org/10.3389/fimmu.2022.982155">https://dx.doi.org/10.3389/fimmu.2022.982155</a>                                                                                                                                                                                                       | Wrong patient population |
| 64. | Li H, Lin H, Chen X, et al A need of COVID19 vaccination for children aged <12 years: Comparative evidence from the clinical characteristics in patients during a recent Delta surge (B.1.617.2). medRxiv. 2021. doi:10.1101/2021.11.05.21265712.                                                                                                                                                                                                                                                       | Wrong intervention       |
| 65. | Li M, Hao J, Jiang T, et al Maternal and neonatal safety of COVID-19 vaccination during the peripregnancy period: A prospective study. <i>Journal of Medical Virology.</i> 2023. 95(1), e28378. <a href="https://dx.doi.org/10.1002/jmv.28378">https://dx.doi.org/10.1002/jmv.28378</a>                                                                                                                                                                                                                 | Wrong outcomes           |
| 66. | Li X, Gao L, Tong X, et al Autoimmune conditions following mRNA (BNT162b2) and inactivated (CoronaVac) COVID-19 vaccination: A descriptive cohort study among 1.1 million vaccinated people in Hong Kong. <i>J Autoimmun.</i> 2022;130:102830. doi:10.1016/j.jaut.2022.102830.                                                                                                                                                                                                                          | Wrong patient population |
| 67. | Liu Y, Liunuobei Z, Wang L, et al Clinical and Humoral Immune Response Characterization of SARS-CoV-2 Omicron BA. 2.38 Infection in Pediatric Patients. 2022. Available at SSRN 4307105.                                                                                                                                                                                                                                                                                                                | Wrong patient population |
| 68. | Liu Z, Le K, Zhou X, et al Neutralising antibody potency against SARS-CoV-2 wild-type and omicron BA. 1 and BA. 4/5 variants in patients with inflammatory bowel disease treated with infliximab and vedolizumab after three doses of COVID-19 vaccine (CLARITY IBD): an analysis of a prospective multicentre cohort study. <i>The Lancet Gastroenterology &amp; Hepatology.</i> 2022. <a href="https://dx.doi.org/10.1016/S2468-1253(22)00389-2">https://dx.doi.org/10.1016/S2468-1253(22)00389-2</a> | Wrong patient population |
| 69. | Ma AL, Leung D, Chan EY, et al Antibody responses to 2 doses of mRNA COVID-19 vaccine in pediatric patients with kidney diseases. <i>Kidney Int.</i> 2022;101(5):1069-72. doi:10.1016/j.kint.2022.01.035.                                                                                                                                                                                                                                                                                               | Wrong patient population |
| 70. | Madhi SA, Kwatra G, Myers JE, et al South African Population Immunity and Severe Covid-19 with Omicron Variant. medRxiv. 2022. doi:10.1101/2021.12.20.21268096.                                                                                                                                                                                                                                                                                                                                         | Wrong intervention       |
| 71. | Manno EC, Amodio D, Cotugno N, et al Higher Troponin Levels on Admission are associated With Persistent Cardiac Magnetic Resonance Lesions in Children Developing Myocarditis After mRNA-Based COVID-19 Vaccination. <i>The Pediatric Infectious Disease Journal</i> 2022. 42(2), 166-171. <a href="https://dx.doi.org/10.1097/INF.0000000000003762">https://dx.doi.org/10.1097/INF.0000000000003762</a>                                                                                                | Wrong patient population |
| 72. | Marks KJ, Whitaker M, Anglin O, et al Hospitalizations of Children and Adolescents with Laboratory-Confirmed COVID-19 - COVID-NET, 14 States, July 2021-January 2022. <i>MMWR Morb Mortal Wkly Rep.</i> 2022;71(7):271-8. doi:10.15585/mmwr.mm7107e4.                                                                                                                                                                                                                                                   | Wrong intervention       |
| 73. | Marshall NE, Blanton MB, Doratt BM, et al SARS-CoV-2 Vaccine Booster Elicits Robust Prolonged Maternal Antibody Responses and Passive Transfer Via The Placenta And Breastmilk. bioRxiv, 2022-11. <a href="https://dx.doi.org/10.1101/2022.11.29.518385">https://dx.doi.org/10.1101/2022.11.29.518385</a>                                                                                                                                                                                               | Wrong outcomes           |
| 74. | Miller AD, Yousaf AR, Bornstein E, et al Multisystem Inflammatory Syndrome in Children During Severe Acute Respiratory Syndrome Coronavirus 2 (SARS-CoV-2) Delta and Omicron Variant Circulation—United States, July 2021–January 2022. <i>Clinical Infectious Diseases</i> , Volume 75, Issue Supplement_2, 1 October 2022, Pages S303–S307, <a href="https://doi.org/10.1093/cid/ciac471">https://doi.org/10.1093/cid/ciac471</a>                                                                     | Wrong patient population |
| 75. | Mizrabi B, Sudry T, Flaks-Manov N, et al Long covid outcomes at one year after mild SARS-CoV-2 infection: nationwide cohort study. <i>Bmj.</i> 2023. 380. <a href="https://dx.doi.org/10.1136/bmj-2022-072529">https://dx.doi.org/10.1136/bmj-2022-072529</a>                                                                                                                                                                                                                                           | Wrong patient population |

|     |                                                                                                                                                                                                                                                                                                                                                                                                                                                                                                                                                                                                                                                                                                                                                                                                                                                                                                                                                                                                                                                                                                                  |                          |
|-----|------------------------------------------------------------------------------------------------------------------------------------------------------------------------------------------------------------------------------------------------------------------------------------------------------------------------------------------------------------------------------------------------------------------------------------------------------------------------------------------------------------------------------------------------------------------------------------------------------------------------------------------------------------------------------------------------------------------------------------------------------------------------------------------------------------------------------------------------------------------------------------------------------------------------------------------------------------------------------------------------------------------------------------------------------------------------------------------------------------------|--------------------------|
| 76. | Morgan MC, Atri L, Harrell S, Al-Jaroudi W, Berman A. COVID-19 vaccine-associated myocarditis. <i>World Journal of Cardiology</i> . 2022. 14(7), 382. <a href="https://dx.doi.org/10.4330/wjc.v14.i7.382">https://dx.doi.org/10.4330/wjc.v14.i7.382</a>                                                                                                                                                                                                                                                                                                                                                                                                                                                                                                                                                                                                                                                                                                                                                                                                                                                          | Wrong study design       |
| 77. | Morgans HA, Bradley T, Flebbe-Rehwaldt L, et al Humoral and cellular response to the COVID-19 vaccine in immunocompromised children. <i>Pediatric Research</i> . 2022. 1-6. <a href="https://dx.doi.org/10.1038/s41390-022-02374-4">https://dx.doi.org/10.1038/s41390-022-02374-4</a>                                                                                                                                                                                                                                                                                                                                                                                                                                                                                                                                                                                                                                                                                                                                                                                                                            | Wrong patient population |
| 78. | NN. Research of Safety and Immune Response of COVID-19 Vaccination in Healthy Children and Children With Chronic HBV infection. <i>Chinese Clinical Trial Registry</i> . 2021. <a href="http://www.epistemonikos.org/documents/bdec55cf5ef303e1cef29c521537f18dbef1ded">http://www.epistemonikos.org/documents/bdec55cf5ef303e1cef29c521537f18dbef1ded</a> .                                                                                                                                                                                                                                                                                                                                                                                                                                                                                                                                                                                                                                                                                                                                                     | Wrong study design       |
| 79. | NN. In brief: Myocarditis with the Pfizer/BioNTech and Moderna COVID-19 vaccines. <i>Med Lett Drugs Ther</i> . 2021;63(1629):e9. <a href="https://www.ncbi.nlm.nih.gov/pubmed/34544112">https://www.ncbi.nlm.nih.gov/pubmed/34544112</a> .                                                                                                                                                                                                                                                                                                                                                                                                                                                                                                                                                                                                                                                                                                                                                                                                                                                                       | Wrong patient population |
| 80. | NN. Covid-19-vaccine-pfizer-biontech: Multisystem inflammatory syndrome in children like symptoms: case report. <i>Reactions Weekly</i> 2022;1891(1):109-. <a href="https://search.bvsalud.org/global-literature-on-novel-coronavirus-2019-ncov/resource/en/covidwho-1660881">https://search.bvsalud.org/global-literature-on-novel-coronavirus-2019-ncov/resource/en/covidwho-1660881</a> .                                                                                                                                                                                                                                                                                                                                                                                                                                                                                                                                                                                                                                                                                                                     | Wrong patient population |
| 81. | Novavax Inc. Novavax Announces Positive Results of COVID-19 Vaccine in Pediatric Population of PREVENT-19 Phase 3 Clinical Trial Press release - PR Newswire - Feb 10, 2022, 16:02 ET. 2022. <a href="http://www.epistemonikos.org/documents/9abc620055771277a5debe06b04c31a2bc1dc6db">http://www.epistemonikos.org/documents/9abc620055771277a5debe06b04c31a2bc1dc6db</a> .                                                                                                                                                                                                                                                                                                                                                                                                                                                                                                                                                                                                                                                                                                                                     | Wrong publication type   |
| 82. | Nyberg T, Ferguson NM, Nash SG, et al Comparative Analysis of the Risks of Hospitalisation and Death Associated with SARS-CoV-2 Omicron (B.1.1.529) and Delta (B.1.617.2) Variants in England. SSRN. 2022. <a href="http://www.epistemonikos.org/documents/37f955c813703d443b9882ab7c928d4c8d292847">http://www.epistemonikos.org/documents/37f955c813703d443b9882ab7c928d4c8d292847</a> .                                                                                                                                                                                                                                                                                                                                                                                                                                                                                                                                                                                                                                                                                                                       | Wrong outcomes           |
| 83. | Nygaard U, Holm M, Hartling UB, et al Multisystem Inflammatory Syndrome in Children Following the SARS-CoV-2 Delta Variant in Denmark: Clinical Phenotype and Risk by Vaccination Status and Compared to the Pre-Delta COVID-19 Era. SSRN. 2022. <a href="http://www.epistemonikos.org/documents/29fdcafbfb4e0ea54de47a73cf427fec24a1ffb">http://www.epistemonikos.org/documents/29fdcafbfb4e0ea54de47a73cf427fec24a1ffb</a> .                                                                                                                                                                                                                                                                                                                                                                                                                                                                                                                                                                                                                                                                                   | Wrong intervention       |
| 84. | Oliver SE, Wallace M, Link-Gelles R. COVID-19 Vaccines: Safe and Effective in Children Ages 5-11 Years. <i>Pediatrics</i> . 2022. doi:10.1542/peds.2022-057314.                                                                                                                                                                                                                                                                                                                                                                                                                                                                                                                                                                                                                                                                                                                                                                                                                                                                                                                                                  | Wrong study design       |
| 85. | Pandit T, Pandit R, Goyal L. Uncommon Side Effects of COVID-19 Vaccination in the Pediatric Population. <i>Cureus</i> . 2022. 14(10). <a href="https://dx.doi.org/10.7759/cureus.30276">https://dx.doi.org/10.7759/cureus.30276</a>                                                                                                                                                                                                                                                                                                                                                                                                                                                                                                                                                                                                                                                                                                                                                                                                                                                                              | Wrong study design       |
| 86. | Patel T, Kelleman M, West Z, et al Comparison of MIS-C Related Myocarditis, Classic Viral Myocarditis, and COVID-19 Vaccine related Myocarditis in Children. <i>medRxiv</i> . 2021. doi:10.1101/2021.10.05.21264581.                                                                                                                                                                                                                                                                                                                                                                                                                                                                                                                                                                                                                                                                                                                                                                                                                                                                                             | Wrong intervention       |
| 87. | Perez MA, Hsiao HM, Chen X, et al Serologic Responses to COVID-19 Vaccination in Children with History of Multisystem Inflammatory Syndrome (MIS-C). <i>medRxiv</i> , 2022-11. <a href="https://dx.doi.org/10.1101/2022.11.19.22282551">https://dx.doi.org/10.1101/2022.11.19.22282551</a>                                                                                                                                                                                                                                                                                                                                                                                                                                                                                                                                                                                                                                                                                                                                                                                                                       | Wrong patient population |
| 88. | Pescarini JM, Cardoso AM, Santos RV, et al Vaccine Coverage and Effectiveness Against Laboratory-Confirmed Symptomatic and Severe COVID-19 in Indigenous People in Brazil: A Cohort Study. 2022. <a href="https://reggroup-production.s3.amazonaws.com/documents/ReviewReference/594853273/SSRN-id4224510.pdf?response-content-type=application%2Fpdf&amp;X-Amz-Algorithm=AWS4-HMAC-SHA256&amp;X-Amz-Credential=AKIAYSFKCAWYQ4D5IUHG%2F20230131%2Fus-east-1%2Fs3%2Faws4_request&amp;X-Amz-Date=20230131T154354Z&amp;X-Amz-Expires=604800&amp;X-Amz-SignedHeaders=host&amp;X-Amz-Signature=e8ba0b190cc45abd2cfa08f4ddfd2cc6777d738e972ce59aa04fb6c202abf812">https://reggroup-production.s3.amazonaws.com/documents/ReviewReference/594853273/SSRN-id4224510.pdf?response-content-type=application%2Fpdf&amp;X-Amz-Algorithm=AWS4-HMAC-SHA256&amp;X-Amz-Credential=AKIAYSFKCAWYQ4D5IUHG%2F20230131%2Fus-east-1%2Fs3%2Faws4_request&amp;X-Amz-Date=20230131T154354Z&amp;X-Amz-Expires=604800&amp;X-Amz-SignedHeaders=host&amp;X-Amz-Signature=e8ba0b190cc45abd2cfa08f4ddfd2cc6777d738e972ce59aa04fb6c202abf812</a> | Wrong patient population |
| 89. | Pillay A, Yeola A, Tea F, et al Infection and vaccine induced Spike antibody responses against SARS-CoV-2 Variants of concern in immune naïve children and adults. 2022. <a href="https://dx.doi.org/10.21203/rs.3.rs-2262275/v1">https://dx.doi.org/10.21203/rs.3.rs-2262275/v1</a>                                                                                                                                                                                                                                                                                                                                                                                                                                                                                                                                                                                                                                                                                                                                                                                                                             | Wrong patient population |
| 90. | Pinto Pereira SM, Nugawela MD, Rojas NK, et al Post-COVID-19 condition at 6 months and COVID-19 vaccination in non-hospitalised children and young people. <i>Archives of Disease in Childhood</i> . 2023. <a href="https://dx.doi.org/10.1136/archdischild-2022-324656">https://dx.doi.org/10.1136/archdischild-2022-324656</a>                                                                                                                                                                                                                                                                                                                                                                                                                                                                                                                                                                                                                                                                                                                                                                                 | Wrong patient population |
| 91. | Plexision. Immunity After COVID-19 Vaccination. <i>clinicaltrials.gov</i> . 2021. <a href="http://www.epistemonikos.org/documents/ebfe929bb8894b479b6a673da0c2ce87669f82ce">http://www.epistemonikos.org/documents/ebfe929bb8894b479b6a673da0c2ce87669f82ce</a> .                                                                                                                                                                                                                                                                                                                                                                                                                                                                                                                                                                                                                                                                                                                                                                                                                                                | Wrong patient population |
| 92. | Pontificia Universidad Catolica de Chile. Immune Response to Anti COVID-19 Vaccine in Immunocompromised Patients: a Cohort Study. <i>clinicaltrials.gov</i> . 2021. <a href="https://clinicaltrials.gov/show/NCT04888793">https://clinicaltrials.gov/show/NCT04888793</a> .                                                                                                                                                                                                                                                                                                                                                                                                                                                                                                                                                                                                                                                                                                                                                                                                                                      | Wrong patient population |
| 93. | Porwal T, Agarwal A. Covid-19 vaccine-induced skin rash: A case study. <i>Indian Academy of Clinical Medicine</i> . 2021;22(3-4):154-5. <a href="https://search.bvsalud.org/global-literature-on-novel-coronavirus-2019-ncov/resource/en/covidwho-1576291">https://search.bvsalud.org/global-literature-on-novel-coronavirus-2019-ncov/resource/en/covidwho-1576291</a> .                                                                                                                                                                                                                                                                                                                                                                                                                                                                                                                                                                                                                                                                                                                                        | Wrong patient population |
| 94. | Princess Máxima Center for Pediatric Oncology. Prospective monitoring of immune response following COVID-19 vaccination in children with cancer. <i>Netherlands Trial Register</i> . 2021. <a href="http://www.epistemonikos.org/documents/3bc3eb50037491f07c6d27cb88dd2fcd6b5293b1">http://www.epistemonikos.org/documents/3bc3eb50037491f07c6d27cb88dd2fcd6b5293b1</a> .                                                                                                                                                                                                                                                                                                                                                                                                                                                                                                                                                                                                                                                                                                                                       | Wrong patient population |
| 95. | Qassim SH, Hasan MR, Tang P, et al Effects of SARS-CoV-2 Alpha, Beta, and Delta variants, age, vaccination, and prior infection on infectiousness of SARS-CoV-2 infections. <i>medRxiv</i> , 2022-07. <a href="https://dx.doi.org/10.3389/fimmu.2022.984784">https://dx.doi.org/10.3389/fimmu.2022.984784</a>                                                                                                                                                                                                                                                                                                                                                                                                                                                                                                                                                                                                                                                                                                                                                                                                    | Wrong outcomes           |
| 96. | Qin CX, Auerbach SR, Chamaya O, et al Antibody response to 2-dose SARS-CoV-2 mRNA vaccination in pediatric solid organ transplant recipients. <i>Am J Transplant</i> . 2022;22(2):669-72. doi:10.1111/ajt.16841.                                                                                                                                                                                                                                                                                                                                                                                                                                                                                                                                                                                                                                                                                                                                                                                                                                                                                                 | Wrong patient population |
| 97. | Rose J, McCullough PA. WITHDRAWN: A Report on Myocarditis Adverse Events in the U.S. Vaccine Adverse Events Reporting System (VAERS) in Association with COVID-19 Injectable Biological Products. <i>Curr Probl Cardiol</i> . 2021;101011. doi:10.1016/j.cpcardiol.2021.101011.                                                                                                                                                                                                                                                                                                                                                                                                                                                                                                                                                                                                                                                                                                                                                                                                                                  | Paper withdrawn          |
| 98. | Rostad CA, Chen X, Sun HY, et al Functional antibody responses to SARS-CoV-2 variants in children with COVID-19, MIS-C, and after two doses of BNT162b2 vaccination. <i>J Infect Dis</i> . 2022. doi:10.1093/infdis/jiac215.                                                                                                                                                                                                                                                                                                                                                                                                                                                                                                                                                                                                                                                                                                                                                                                                                                                                                     | Wrong patient population |
| 99. | Sahn B, Lu Y, Hui-Yuen JS, et al The safety of COVID-19 vaccination in immunocompromised children and young adults with immune-mediated inflammatory disease. <i>Acta Paediatrica</i> . 2022. <a href="https://dx.doi.org/10.1111/apa.16652">https://dx.doi.org/10.1111/apa.16652</a>                                                                                                                                                                                                                                                                                                                                                                                                                                                                                                                                                                                                                                                                                                                                                                                                                            | Wrong patient population |



|      |                                                                                                                                                                                                                                                                                                                                                                                                                                                                                                                                                                                                                                                                                                                                                                                                                                                                                                                                                                                                                                                                                                                                                                                                                            |                          |
|------|----------------------------------------------------------------------------------------------------------------------------------------------------------------------------------------------------------------------------------------------------------------------------------------------------------------------------------------------------------------------------------------------------------------------------------------------------------------------------------------------------------------------------------------------------------------------------------------------------------------------------------------------------------------------------------------------------------------------------------------------------------------------------------------------------------------------------------------------------------------------------------------------------------------------------------------------------------------------------------------------------------------------------------------------------------------------------------------------------------------------------------------------------------------------------------------------------------------------------|--------------------------|
| 100. | Sakaida K, Iwashima S, Katuki J, et al Multisystem inflammatory syndrome in Children After BNT162b2 Messenger RNA SARS-CoV-2 Vaccination. <i>Pediatrics International</i> 2022. <a href="https://dx.doi.org/10.1111/ped.15441">https://dx.doi.org/10.1111/ped.15441</a>                                                                                                                                                                                                                                                                                                                                                                                                                                                                                                                                                                                                                                                                                                                                                                                                                                                                                                                                                    | Wrong patient population |
| 101. | Seery V, Raiden S, Russo C, et al Antibody response against SARS-CoV-2 variants of concern in children infected with pre-Omicron variants: An observational cohort study. <i>EBioMedicine</i> . 2022 83, 104230. doi: 10.1016/j.ebiom.2022.104230.                                                                                                                                                                                                                                                                                                                                                                                                                                                                                                                                                                                                                                                                                                                                                                                                                                                                                                                                                                         | Wrong intervention       |
| 102. | Shahid R, Tang W, Klein AL, Kwon D, Amdani S. Is the mRNA COVID-19 Vaccine Safe in Patients With a Prior History of Myocarditis?                                                                                                                                                                                                                                                                                                                                                                                                                                                                                                                                                                                                                                                                                                                                                                                                                                                                                                                                                                                                                                                                                           | Wrong patient population |
| 103. | Shire ZJ, Reichert F, Lawrence S, et al Antibody response to the BNT162b2 SARS-CoV-2 vaccine in paediatric patients with inflammatory bowel disease treated with anti-TNF therapy. <i>Gut</i> 2022;71:1922-1924. <i>J Card Fail</i> . 2022 Jul 13;S1071-9164(22)00575-9. doi: 10.1016/j.cardfail.2022.06.011. Online ahead of print.                                                                                                                                                                                                                                                                                                                                                                                                                                                                                                                                                                                                                                                                                                                                                                                                                                                                                       | Wrong patient population |
| 104. | Shurrah FM, Al-Sadeq DW, Abou-Saleh H, et al Assessment of the Neutralizing Antibody Response of BNT162b2 and mRNA-1273 SARS-CoV-2 Vaccines in Naive and Previously Infected Individuals: A Comparative Study. <i>Vaccines (Basel)</i> . 2022;10(2). doi:10.3390/vaccines10020191.                                                                                                                                                                                                                                                                                                                                                                                                                                                                                                                                                                                                                                                                                                                                                                                                                                                                                                                                         | Wrong patient population |
| 105. | Slomski A. Moderna COVID-19 Vaccine Safe and Effective for Children 6 Months to 5 Years. <i>JAMA</i> . 2022. 328(24), 2388-2388. <a href="https://dx.doi.org/10.1001/jama.2022.20056">https://dx.doi.org/10.1001/jama.2022.20056</a>                                                                                                                                                                                                                                                                                                                                                                                                                                                                                                                                                                                                                                                                                                                                                                                                                                                                                                                                                                                       | Wrong study design       |
| 106. | Smirnov VS, Lyalina LV, Milichkina AM, et al Longitudinal Randomized Cohort Study of SARS-CoV-2 Antibody Seroprevalence in the St. Petersburg Population (preprint). <i>Viruses</i> . 2022;14(5):913. doi:10.3390/v14050913.                                                                                                                                                                                                                                                                                                                                                                                                                                                                                                                                                                                                                                                                                                                                                                                                                                                                                                                                                                                               | Wrong intervention       |
| 107. | Sorg AL, Schönfeld V, Siedler A, et al SARS-CoV-2 variants and the risk of pediatric inflammatory multisystem syndrome temporally associated with SARS-CoV-2 among children in Germany. <i>Infection</i> (2022). <a href="https://doi.org/10.1007/s15010-022-01908-6">https://doi.org/10.1007/s15010-022-01908-6</a>                                                                                                                                                                                                                                                                                                                                                                                                                                                                                                                                                                                                                                                                                                                                                                                                                                                                                                       | Wrong intervention       |
| 108. | Spencer EA, Klang E, Dolinger M, Pittman N, Dubinsky MC. Seroconversion following SARS-CoV-2 Infection or Vaccination in Pediatric IBD Patients. <i>medRxiv</i> . 2021. doi:10.1101/2021.05.18.21257400.                                                                                                                                                                                                                                                                                                                                                                                                                                                                                                                                                                                                                                                                                                                                                                                                                                                                                                                                                                                                                   | Wrong patient population |
| 109. | Stringhini S, Zaballa M-E, Pullen N, et al Seroprevalence of anti-SARS-CoV-2 antibodies six months into the vaccination campaign in Geneva, Switzerland. <i>medRxiv</i> . 2021. doi:10.1101/2021.08.12.21261929.                                                                                                                                                                                                                                                                                                                                                                                                                                                                                                                                                                                                                                                                                                                                                                                                                                                                                                                                                                                                           | Wrong intervention       |
| 110. | Suehiro M, Okubo S, Nakajima K, et al Adverse events following COVID-19 vaccination in young Japanese people: A case-control study of the risk of systemic adverse events by a questionnaire survey. <i>medRxiv</i> . 2021. doi:10.1101/2021.10.01.21264393.                                                                                                                                                                                                                                                                                                                                                                                                                                                                                                                                                                                                                                                                                                                                                                                                                                                                                                                                                               | Wrong patient population |
| 111. | Sulemankhil I, Abdelrahman M, Negi SI. Temporal Association Between the COVID-19 Ad26.COVS.2.S Vaccine and Acute Myocarditis: A Case Report and Literature Review. <i>Cardiovasc Revasc Med</i> . 2022;38:117-23. doi:10.1016/j.carrev.2021.08.012.                                                                                                                                                                                                                                                                                                                                                                                                                                                                                                                                                                                                                                                                                                                                                                                                                                                                                                                                                                        | Wrong patient population |
| 112. | Sunder A, Alqatari HM, Taha OE, et al COVID-19 vaccinations in pregnancy: Save mother and baby from COVID-19 pandemic. <i>International Journal of Gynecology &amp; Obstetrics</i> . 2022. <a href="https://dx.doi.org/10.1002/ijgo.14532">https://dx.doi.org/10.1002/ijgo.14532</a>                                                                                                                                                                                                                                                                                                                                                                                                                                                                                                                                                                                                                                                                                                                                                                                                                                                                                                                                       | Wrong outcomes           |
| 113. | Sutardi AQAI, Ramatillah DL. Evaluation Comparison between Sinovac and Pfizer Vaccine among Indonesian Children and Teenager under 18 Years Old. <i>International Journal of Applied Pharmaceutics</i> . 2022;14(Special issue 2):22-30. doi:10.22159/ijap.2022.v14s2.44745.                                                                                                                                                                                                                                                                                                                                                                                                                                                                                                                                                                                                                                                                                                                                                                                                                                                                                                                                               | Wrong patient population |
| 114. | Suthar MS, Arunachalam PS, Hu M, et al Durability of immune responses to the BNT162b2 mRNA vaccine. <i>Med (N Y)</i> . 2022;3(1):25-7. doi:10.1016/j.medj.2021.12.005.                                                                                                                                                                                                                                                                                                                                                                                                                                                                                                                                                                                                                                                                                                                                                                                                                                                                                                                                                                                                                                                     | Wrong patient population |
| 115. | Toh ZQ, Mazarakis N, Nguyen J, et al Comparison of antibody responses to SARS-CoV-2 variants in Australian children. <i>Nature Communications</i> , 13(1), 7185. <a href="https://dx.doi.org/10.1038/s41467-022-34983-2">https://dx.doi.org/10.1038/s41467-022-34983-2</a>                                                                                                                                                                                                                                                                                                                                                                                                                                                                                                                                                                                                                                                                                                                                                                                                                                                                                                                                                 | Wrong patient population |
| 116. | Tomasoni D, Tavelli A, Rodano A, et al Reactogenicity of mRNA-1273 vaccine in people living with HIV (PLWH): a prospective study. <i>Hiv Medicine</i> . 2021;22:23-4. <Go to ISI>://WOS:000711388200023.                                                                                                                                                                                                                                                                                                                                                                                                                                                                                                                                                                                                                                                                                                                                                                                                                                                                                                                                                                                                                   | Wrong patient population |
| 117. | Topf KG, Sheppard M, Marx GE, et al Impact of the COVID-19 Vaccination Program on case incidence, emergency department visits, and hospital admissions among children aged 5–17 Years during the Delta and Omicron Periods—United States, December 2020 to April 2022. <i>Plos one</i> . 2022. 17(12), e0276409. <a href="https://regroup-production.s3.amazonaws.com/documents/ReviewReference/594853153/SSRN-id4229903.pdf?response-content-type=application%2Fpdf&amp;X-Amz-Algorithm=AWS4-HMAC-SHA256&amp;X-Amz-Credential=AKIA5YFKAWYQ4D5IUHG%2F20230131%2Fus-east-1%2Fs3%2Faws4_request&amp;X-Amz-Date=20230131T154354Z&amp;X-Amz-Expires=604800&amp;X-Amz-SignedHeaders=host&amp;X-Amz-Signature=a073a8156fec32eff792d587c7f9c477db4e9ccb4ec2e8cd1b28f2c029f165c">https://regroup-production.s3.amazonaws.com/documents/ReviewReference/594853153/SSRN-id4229903.pdf?response-content-type=application%2Fpdf&amp;X-Amz-Algorithm=AWS4-HMAC-SHA256&amp;X-Amz-Credential=AKIA5YFKAWYQ4D5IUHG%2F20230131%2Fus-east-1%2Fs3%2Faws4_request&amp;X-Amz-Date=20230131T154354Z&amp;X-Amz-Expires=604800&amp;X-Amz-SignedHeaders=host&amp;X-Amz-Signature=a073a8156fec32eff792d587c7f9c477db4e9ccb4ec2e8cd1b28f2c029f165c</a> | Wrong outcomes           |
| 118. | Topf KG, Sheppard M, Marx GE, et al Impact of the COVID-19 Vaccination Program on case incidence, emergency department visits, and hospital admissions among children aged 5–17 Years during the Delta and Omicron Periods—United States, December 2020 to April 2022. <i>medRxiv</i> . 2022. <a href="https://dx.doi.org/10.1101/2022.10.07.22280822">https://dx.doi.org/10.1101/2022.10.07.22280822</a>                                                                                                                                                                                                                                                                                                                                                                                                                                                                                                                                                                                                                                                                                                                                                                                                                  | Wrong outcomes           |
| 119. | Toussia-Cohen S, Nir O, Peretz-Machluf R, et al Maternal and neonatal immune responses following COVID-19 infection and vaccinations in pregnancy. <i>Vaccines</i> . 2022. 10(12), 2019. <a href="https://dx.doi.org/10.3390/vaccines10122019">https://dx.doi.org/10.3390/vaccines10122019</a>                                                                                                                                                                                                                                                                                                                                                                                                                                                                                                                                                                                                                                                                                                                                                                                                                                                                                                                             | Wrong outcomes           |
| 120. | Tri A, Mills K, Nilsen K. Pediatric COVID-19 Vaccination: A Description of Adverse Events or Reactions Reported in Kansans Aged 6 to 17. <i>Kansas Journal of Medicine</i> . 2022. 15(3), 390-393. <a href="https://dx.doi.org/10.17161/kjm.vol15.18431">https://dx.doi.org/10.17161/kjm.vol15.18431</a>                                                                                                                                                                                                                                                                                                                                                                                                                                                                                                                                                                                                                                                                                                                                                                                                                                                                                                                   | Wrong patient population |
| 121. | Umbrello M, Brena N, Vercelli R, et al Successful treatment of acute spleno-porto-mesenteric vein thrombosis after ChAdOx1 nCoV-19 vaccine. A case report. <i>J Crit Care</i> . 2021;65:72-5. doi:10.1016/j.jcrc.2021.05.021.                                                                                                                                                                                                                                                                                                                                                                                                                                                                                                                                                                                                                                                                                                                                                                                                                                                                                                                                                                                              | Wrong patient population |
| 122. | Villagrasa-Boli P, Monte-Serrano J, Martinez-Cisneros S, et al Papular acrodermatitis of childhood-like eruption triggered by SARS-CoV-2 vaccination: Report of two cases. <i>Dermatol Ther</i> . 2022;35(2):e15252. doi:10.1111/dth.15252.                                                                                                                                                                                                                                                                                                                                                                                                                                                                                                                                                                                                                                                                                                                                                                                                                                                                                                                                                                                | Wrong patient population |

|      |                                                                                                                                                                                                                                                                                                                                                                                                     |                          |
|------|-----------------------------------------------------------------------------------------------------------------------------------------------------------------------------------------------------------------------------------------------------------------------------------------------------------------------------------------------------------------------------------------------------|--------------------------|
| 123. | Wisniewski M, Chun A, Volpi S, et al Outcomes After SARS-CoV-2 Vaccination Among Children With a History of Multisystem Inflammatory Syndrome. <i>JAMA Netw Open.</i> 2022;5(3):e224750. doi:10.1001/jamanetworkopen.2022.4750.                                                                                                                                                                     | Wrong patient population |
| 124. | Wong J, Sharma S, Yao JV, Aggarwal A, Grigg L. COVID-19 mRNA vaccine (Comirnaty)-induced myocarditis. <i>Med J Aust.</i> 2022;216(3):122-3. doi:10.5694/mja2.51394.                                                                                                                                                                                                                                 | Wrong patient population |
| 125. | Wu K, Werner AP, Koch M, et al Serum Neutralizing Activity Elicited by mRNA-1273 Vaccine. <i>N Engl J Med.</i> 2021;384(15):1468-70. doi:10.1056/NEJMc2102179.                                                                                                                                                                                                                                      | Wrong patient population |
| 126. | Yadav V, Kumar P, Kushal A, Yadav R, Anjali P. Covid-19 Morbidity amongst Covishield Vaccinated Vs Non-Vaccinated: A Comparative Study. <i>National Journal of Community Medicine.</i> 2022;13(2):60-3. doi:10.5455/njcm.20211014065554.                                                                                                                                                            | Wrong patient population |
| 127. | Yang H, Li Z, Zhang R, et al Safety of primary immunization using inactivated SARS-CoV-2 vaccine (CoronaVac®) among population aged 3 years and older in a large-scale use: A multi-center open-label study in China. <i>Vaccine.</i> 2023. <a href="https://dx.doi.org/10.1016/j.vaccine.2023.01.020">https://dx.doi.org/10.1016/j.vaccine.2023.01.020</a>                                         | Wrong patient population |
| 128. | Yang Y, Xing H, Zhao Y. Transplacental transmission of SARS-CoV-2 immunoglobulin G antibody to infants from maternal COVID-19 vaccine immunization before pregnancy. <i>Journal of Medical Virology.</i> 2023. 95(1), e28296. <a href="https://dx.doi.org/10.1002/jmv.28296">https://dx.doi.org/10.1002/jmv.28296</a>                                                                               | Wrong intervention       |
| 129. | Zerbo O, Ray GT, Fireman B, et al Maternal SARS-CoV-2 Vaccination and Infant Protection Against SARS-CoV-2 During the First 6 Months of Life. <i>Research Square.</i> 2022. rs-3. <a href="https://dx.doi.org/10.21203/rs.3.rs-2143552/v1">https://dx.doi.org/10.21203/rs.3.rs-2143552/v1</a>                                                                                                       | Wrong patient population |
| 130. | Zhang K, Jiang SY, Yan K, et al Clinical characteristics of 16 neonates infected with SARS-CoV-2 during Omicron variant outbreak. <i>Zhonghua er ke za zhi= Chinese Journal of Pediatrics.</i> 2022. 60(11), 1158-1162. <a href="https://dx.doi.org/10.3760/cma.j.cn112140-20220617-00561">https://dx.doi.org/10.3760/cma.j.cn112140-20220617-00561</a>                                             | Wrong patient population |
| 131. | Zhang YF, Liang SS, Wu PL, et al Clinical features of severe acute respiratory syndrome coronavirus 2 Omicron variant infection in children: an analysis of 201 cases. <i>Zhongguo dang dai er ke za zhi= Chinese journal of contemporary paediatrics.</i> 2023. 25(1), 5-10. <a href="https://dx.doi.org/10.7499/j.issn.1008-8830.2207052">https://dx.doi.org/10.7499/j.issn.1008-8830.2207052</a> | Wrong study design       |

| Exclusion reason         | Frequency |
|--------------------------|-----------|
| Wrong patient population | 85        |
| Wrong intervention       | 15        |
| Wrong outcomes           | 15        |
| Wrong study design       | 11        |
| Wrong comparator         | 2         |
| Paper withdrawn          | 1         |
| Wrong publication type   | 1         |
| Wrong setting            | 1         |
| Total                    | 131       |

## Supplementary results

### Risk of Bias

Judgements per study and outcome are provided for each domain of the respective assessment tool in the provided RoB spreadsheet (Appendix 2) and summarised below.

#### Risk of bias in RCTs

Overall, we had some concerns of bias for most outcomes assessed (13/17). Efficacy outcomes (VE against SARS-CoV-2 infection, symptomatic COVID-19, hospitalisation, mortality, and MIS-C) were all judged with some concerns, due to performing a per-protocol rather than an intention-to-treat analysis, leading to missing outcome data in both trials<sup>12,13</sup> and the probability of selective reporting in one trial as interim analysis was not performed according to pre-specified rule.<sup>12</sup>

All safety outcomes (AESIs, local and systemic reactions, and unsolicited AEs), except for SAEs, were also judged with some concerns of bias. Our concerns originated from the measurement of the outcomes as parts of the study personnel were not blinded (e.g., persons administering vaccinations). Outcomes were self-reported events (electronic study diary), and possible knowledge of group assignment (communicated knowingly or unknowingly by study personnel) could have influenced the reporting or assessment of events by individual study participants or caregivers. We judged SAEs with a low risk of bias, because a possible knowledge of the intervention status would probably not affect ascertainment of SAEs given the objectiveness of the outcome due to their underlying severity.

#### Risk of bias in NRSIs

The overall risk of bias in NRSIs was rated at least with a serious risk in about half of the outcomes (serious risk: 13/40; critical risk: 8/40). All but two assessed outcomes referred to effectiveness data. Key concerns mainly originated from incomplete or missing adjustment for relevant confounders (e.g. comorbidities, (time since) previous SARS-CoV-2 infection, socioeconomic status or risk of exposure, etc.). Outcomes that were not judged as “serious” or “critical” were rated with a moderate risk of bias (19/40), mainly due to potential residual confounding and the probability of selective reporting due to the retrospective study designs. Those were: SARS-CoV-2 infections reported in 6 studies,<sup>14-19</sup> symptomatic COVID-19 reported in 5 studies,<sup>17,18,20-22</sup> and COVID-19 related hospitalisation reported in 4 studies.<sup>16,21-23</sup>

As recommended in the ROBINS-I guidance, outcomes rated with a critical risk of bias were not further included in data synthesis.<sup>2</sup> Those were: SARS-CoV-2 infections in 1 study,<sup>24</sup> COVID-19 related hospitalisation reported in 3 studies,<sup>25-27</sup> ICU-admissions reported in 2 studies,<sup>26,27</sup> deaths reported in 1 study,<sup>27</sup> and myocarditis in 1 study.<sup>28</sup>

#### Risk of bias in single-arm studies

As only the approved dosing schedule was included in our review, data from dose-finding phase 1 trials were assessed along with other single-arm studies with the QUIPS-tool. All assessed outcomes were safety outcomes (SAEs, AESIs, local and systemic reactions, and unsolicited AEs), and 43/52 were rated as “high” for the overall risk of bias. Local and systemic reactions, and unsolicited AEs were mostly rated with a high risk of bias, mainly due to the subjectivity in the outcome assessment, and the potential of confounding due to missing assessment of relevant confounders (e.g. sex, comorbidities, etc.). Serious AEs and AESIs reported by the phase 1 trials<sup>12,13</sup> were judged with a moderate risk of bias, as confounding was also not considered. We had no concerns in outcome measurement as participants were closely monitored and objective definitions used. Serious AEs and AESIs reported by the observational studies were rated with a serious risk of bias, as in addition to concerns of potential confounding, there were concerns of attrition or in the measurement of the outcomes (e.g. because data was derived from a nationwide voluntary reporting system and several events probably not reported).

## Study characteristics

### Study, participant and intervention characteristics

| Study                                 | Study design                                                     | Type of publication | Geographical region | Study period      | Variant of Concern                           | COI disclosures                     | Financial support   | Follow-up                                                                                             |
|---------------------------------------|------------------------------------------------------------------|---------------------|---------------------|-------------------|----------------------------------------------|-------------------------------------|---------------------|-------------------------------------------------------------------------------------------------------|
| Amir et al <sup>14</sup>              | Three arm retrospective cohort study <sup>†</sup>                | Peer-reviewed       | Israel              | 12.2021-01.2022   | Omicron                                      | Nothing to disclose                 | No funding received | ≥ 14 days                                                                                             |
| Bartsch et al A <sup>29</sup>         | Cohort study                                                     | Peer-reviewed       | NR                  | NR                | Wildtype, Beta, Delta, Omicron               | Potentially irrelevant <sup>‡</sup> | Industry sponsored  | 28 days after each dose                                                                               |
| Bartsch et al B <sup>30</sup>         | Cohort study                                                     | Peer-reviewed       | NR                  | NR                | Wildtype, Alpha, Beta, Gamma, Delta, Omicron | Potentially relevant <sup>§</sup>   | Non-industrial      | 14 and/or 28 days after each dose                                                                     |
| Bloise et al <sup>31</sup>            | Cross-sectional study <sup>¶</sup>                               | Peer-reviewed       | Italy               | 15.12.-21.12.2021 | NA <sup>  </sup>                             | Nothing to disclose                 | No funding received | 24–48 h, 7 and 20 days after each dose                                                                |
| Capponi et al <sup>32</sup>           | Cross-sectional study <sup>†</sup>                               | Peer-reviewed       | Italy               | 01.02.-28.02.2022 | Omicron                                      | Nothing to disclose                 | No funding received | 14 days after each dose                                                                               |
| Chantasrisawad et al <sup>33</sup>    | single-arm phase 2 clinical trial                                | Peer-reviewed       | Thailand            | 04.2022-05.2022   | Omicron                                      | Nothing to disclose                 | Non-industrial      | 14 days after second dose                                                                             |
| Chemaitelly et al <sup>16</sup>       | Matched cohort study <sup>†</sup>                                | Peer-reviewed       | Qatar               | 01.-07.2022       | Omicron                                      | Nothing to disclose                 | No funding received | Median 69 days (IQR, 31-97 days)                                                                      |
| Cinicola et al <sup>34</sup>          | Cross-sectional study                                            | Peer-reviewed       | Italy               | 02.-03.2022       | Wildtype, Omicron                            | Nothing to disclose                 | Non-industrial**    | 7 to 15 days after second dose                                                                        |
| Cocchio et al <sup>35</sup>           | Retrospective cohort study <sup>†</sup>                          | Peer-reviewed       | Italy               | 02.-04.2022       | Omicron                                      | Nothing to disclose                 | No funding received | ≥ 70 days after last dose                                                                             |
| Cohen-Stavi et al <sup>17</sup>       | Retrospective cohort study emulating a target trial <sup>†</sup> | Peer-reviewed       | Israel              | 11.2021-01.2022   | Omicron                                      | Potentially relevant <sup>§</sup>   | Non-industrial      | 14 to 27 days after first dose, 7 to 21 days after the second dose<br>Median 17 days after first dose |
| Creech et al- Phase 2/3 <sup>13</sup> | RCT, phase 2-3                                                   | Peer-reviewed       | USA, Canada         | NR                | Pre-Omicron <sup>††</sup>                    | NR                                  | Industry sponsored  | Median 51 days after 2nd dose                                                                         |
| Creech et al- Phase 1 <sup>13</sup>   | RCT, phase 1                                                     | Peer-reviewed       | USA, Canada         | NR                | Pre-Omicron <sup>††</sup>                    | NR                                  | Industry sponsored  | NR                                                                                                    |
| Dorabawila et al <sup>25</sup>        | Retrospective cohort study <sup>†</sup>                          | Preprint            | USA                 | 11.2021-01.2022   | Omicron                                      | Nothing to disclose                 | No funding received | Up to 48 days                                                                                         |
| Doucette et al <sup>36</sup>          | Longitudinal cohort study                                        | Preprint            | Canada              | 07.2020-04.2022   | Omicron                                      | NR                                  | Non-industrial**    | NR                                                                                                    |

| Study                                     | Study design                             | Type of publication | Geographical region | Study period                     | Variant of Concern | COI disclosures                     | Financial support   | Follow-up                                                                                                                 |
|-------------------------------------------|------------------------------------------|---------------------|---------------------|----------------------------------|--------------------|-------------------------------------|---------------------|---------------------------------------------------------------------------------------------------------------------------|
| <b>Elias et al</b> <sup>37</sup>          | Cross-sectional study <sup>†</sup>       | Peer-reviewed       | USA                 | 12.2021-02.2022                  | NA <sup>  </sup>   | Potentially relevant <sup>§</sup>   | Non-industrial      | 1 to 304 days after vaccination (median 81 days [IQR, 48-193 days] after dose 1; 63 days [IQR, 36-173 days] after dose 2) |
| <b>Flemming-Dutra et al</b> <sup>20</sup> | Case-control, test-negative <sup>†</sup> | Peer-reviewed       | USA                 | 12.2021-02.2022                  | Omicron            | Nothing to disclose                 | Non-industrial      | 2 months since 2nd dose                                                                                                   |
| <b>Fowlkes et al</b> <sup>15</sup>        | Prospective cohort study <sup>†</sup>    | Other               | USA                 | 12.2021-02.2022                  | Omicron            | Potentially irrelevant <sup>‡</sup> | NR                  | 14-82 days                                                                                                                |
| <b>Girard et al</b> <sup>38*</sup>        | Single-arm, observational                | Preprint            | USA, Canada         | NR                               | Omicron            | Potentially relevant <sup>§</sup>   | Industry sponsored  | Day 57 (28 Days post 2nd dose)                                                                                            |
| <b>Hartono et al</b> <sup>39</sup>        | Case series <sup>†</sup>                 | Peer-reviewed       | USA                 | 05.2021-02.2022                  | NA <sup>  </sup>   | Potentially relevant <sup>§</sup>   | Non-industrial      | NR                                                                                                                        |
| <b>Hause et al A</b> <sup>40</sup>        | Passive surveillance, single-arm         | Other               | USA                 | 11.2021-02.2022                  | NA <sup>  </sup>   | Potentially irrelevant <sup>‡</sup> | Non-industrial**    | NR                                                                                                                        |
| <b>Hause et al B</b> <sup>41</sup>        | Passive Surveillance, single-arm         | Other               | USA                 | 05.-07.2022                      | NA <sup>  </sup>   | Nothing to disclose                 | Non-industrial**    | NR                                                                                                                        |
| <b>Hause et al C</b> <sup>42</sup>        | Passive Surveillance, single-arm         | Other               | USA                 | 10.2022-01.2023                  | NA <sup>  </sup>   | Nothing to disclose                 | Non-industrial**    | NR                                                                                                                        |
| <b>Hu et al</b> <sup>43</sup>             | Active Surveillance, single-arm          | Preprint            | USA                 | 11.2021- 06.2022                 | NA <sup>  </sup>   | Potentially irrelevant <sup>‡</sup> | Non-industrial**    | From first day of vaccination to receipt of next dose, death, disenrollment, end of risk window or end of study period    |
| <b>Jang et al</b> <sup>19</sup>           | Retrospective cohort study               | Peer-reviewed       | South Korea         | 03.-08.2022                      | Omicron            | Nothing to disclose                 | No funding received | Reported intervals: 15-30, 31-60, 61-90; used in meta-analysis: 15-30                                                     |
| <b>Joseph et al</b> <sup>44</sup>         | Prospective cohort study                 | Peer-reviewed       | Israel              | 11.2021-05.2022                  | Delta, Omicron     | Nothing to disclose                 | No funding received | data collections on day 21 (visit 2), day 90 (visit 3), and day 180 (visit 4)                                             |
| <b>Kastl et al</b> <sup>45</sup>          | Prospective cohort study <sup>†</sup>    | Peer-reviewed       | USA                 | 03.2021 (ongoing)                | NA <sup>  </sup>   | Potentially relevant <sup>§</sup>   | Non-industrial      | up to 18 months                                                                                                           |
| <b>Khan et al</b> <sup>18</sup>           | Case-control, test-negative <sup>†</sup> | Peer-reviewed       | USA, Puerto Rico    | 11.2021-12.2021; 01.2022-09.2022 | Delta, Omicron     | Potentially relevant <sup>§</sup>   | Industry sponsored  | up to ≥90 days after vaccination                                                                                          |
| <b>Kim et al</b> <sup>46</sup>            | Passive Surveillance, single-arm         | Peer-reviewed       | Korea               | 03.-07.2022                      | NA <sup>  </sup>   | Nothing to disclose                 | Non-industrial**    | NR                                                                                                                        |
| <b>Klein et al</b> <sup>47</sup>          | Case-control, test-negative              | Other               | USA                 | 04.2021-01.2022                  | Omicron            | Potentially relevant <sup>§</sup>   | Non-industrial      | 14-67 days                                                                                                                |

| Study                                        | Study design                                             | Type of publication | Geographical region             | Study period          | Variant of Concern        | COI disclosures                     | Financial support   | Follow-up                                                                            |
|----------------------------------------------|----------------------------------------------------------|---------------------|---------------------------------|-----------------------|---------------------------|-------------------------------------|---------------------|--------------------------------------------------------------------------------------|
| <b>Leung et al A</b> <sup>48</sup>           | Retrospective ecological surveillance study <sup>†</sup> | Peer-reviewed       | China                           | 01.-04.2022           | Omicron                   | Potentially irrelevant <sup>‡</sup> | Non-industrial      | Mean 24 days (SD 9 days)                                                             |
| <b>Leung et al B</b> <sup>49</sup>           | Non-randomized phase 2 trial                             | Preprint            | China                           | 05.2021-NR            | Wildtype, Omicron         | Nothing to disclose                 | Non-industrial      | post-dose: 14-42 days, adverse reactions: 7 days unsolicited adverse events: 28 days |
| <b>Malden et al</b> <sup>50</sup>            | Cross-sectional study <sup>¶</sup>                       | Peer-reviewed       | USA                             | 11.2021-02.2022       | NA <sup>  </sup>          | Nothing to disclose                 | Non-industrial**    | 0 to 14 days after each dose                                                         |
| <b>Mattiuzzi et al</b> <sup>26</sup>         | Retrospective cohort study                               | Short communication | Italy                           | Data until 27.04.2022 | Omicron <sup>††</sup>     | Nothing to disclose                 | No funding received | < 120 days since completion of primary vaccination schedule                          |
| <b>Nygaard et al</b> <sup>51</sup>           | Prospective cohort study <sup>†</sup>                    | Peer-reviewed       | Denmark                         | 11.2021-03.2022       | NA <sup>  </sup>          | Nothing to disclose                 | Non-industrial      | At least 4 weeks; max. 97 days                                                       |
| <b>Piché-Renaud et al</b> <sup>22</sup>      | Case-control, test-negative <sup>†</sup>                 | Preprint            | Canada                          | 01.-05.2022           | Omicron (BA.1, BA.2)      | Potentially relevant <sup>§</sup>   | Non-industrial      | ≥90 days after vaccination                                                           |
| <b>Price et al</b> <sup>52</sup>             | Case-control, test-negative <sup>¶</sup>                 | Peer-reviewed       | USA                             | 12.2021-02.2022       | Omicron                   | Potentially irrelevant <sup>‡</sup> | Non-industrial      | ≥ 14 days                                                                            |
| <b>Ripabelli et al</b> <sup>53</sup>         | Active surveillance study                                | Peer-reviewed       | Italy                           | 12.2021-01.2022       | NA <sup>  </sup>          | Nothing to disclose                 | No funding received | up to 10 days after vaccination                                                      |
| <b>Rosa Duque et al</b> <sup>54</sup>        | Retrospective ecological study <sup>†</sup>              | Preprint            | China                           | 01.-04.2022           | Omicron (BA.2)            | Potentially relevant <sup>§</sup>   | Non-industrial      | Mean 27.4 days                                                                       |
| <b>Sacco et al</b> <sup>21</sup>             | Retrospective cohort study <sup>†</sup>                  | Peer-reviewed       | Italy                           | 01.-04.2022           | Omicron                   | Nothing to disclose                 | No funding received | SARS-CoV-2: Jan 17 to April 10 Severe disease: Jan 17 to March 13                    |
| <b>Shi et al</b> <sup>27</sup>               | Retrospective cohort study <sup>†</sup>                  | Other               | USA                             | 12.2021-02.2022       | Delta, Omicron            | Potentially irrelevant <sup>‡</sup> | Non-industrial      | ≥14 days since last dose                                                             |
| <b>Simmons et al</b> <sup>55</sup>           | Case-control study <sup>†</sup>                          | Preprint            | Canada                          | 02.2021-01.2022       | Delta, Omicron            | Potentially irrelevant <sup>‡</sup> | Non-industrial      | NR                                                                                   |
| <b>Stich et al</b> <sup>56</sup>             | Retrospective cohort study                               | Peer-reviewed       | Germany                         | 04.2021-04.2022       | Omicron (BA.1)            | Potentially relevant <sup>§</sup>   | Non-industrial**    | Median 34 days (IQR 22 to 63)                                                        |
| <b>Straus et al</b> <sup>28</sup>            | Passive Surveillance, single-arm                         | Peer-reviewed       | Global                          | 12.2020-02.2022       | NA <sup>  </sup>          | Potentially relevant <sup>§</sup>   | Industry sponsored  | From implementation of vaccine programmes to 15.02.2022                              |
| <b>Suntronwong et al</b> <sup>24</sup>       | longitudinal serological cohort study <sup>¶</sup>       | Preprint            | Thailand                        | 01.2021-11.2022       | Omicron                   | Nothing to disclose                 | Non-industrial**    | until 09.11.2022                                                                     |
| <b>Tan et al</b> <sup>23</sup>               | Cohort study <sup>†</sup>                                | Preprint            | Singapore                       | 01.-02.2022           | Omicron                   | Nothing to disclose                 | No funding received | ≥ 7 days after 2nd dose                                                              |
| <b>Walter et al- Phase 2/3</b> <sup>12</sup> | RCT, phase 2-3                                           | Peer-reviewed       | USA, Spain, Finland, and Poland | 06.-10.2021           | Pre-Omicron <sup>††</sup> | Potentially relevant <sup>§</sup>   | Industry sponsored  | Median 2-3 months (range, 0 to 2.5)                                                  |

| Study                                      | Study design                              | Type of publication | Geographical region             | Study period    | Variant of Concern        | COI disclosures                     | Financial support            | Follow-up                                                                                                  |
|--------------------------------------------|-------------------------------------------|---------------------|---------------------------------|-----------------|---------------------------|-------------------------------------|------------------------------|------------------------------------------------------------------------------------------------------------|
| <b>Walter et al- Phase 1</b> <sup>12</sup> | RCT, phase 1                              | Peer-reviewed       | USA, Spain, Finland, and Poland | 03.-09.2021     | Pre-Omicron <sup>††</sup> | Potentially relevant <sup>§</sup>   | Industry sponsored           | From dose 1 to 1 month after dose 2                                                                        |
| <b>Wanlapakorn et al</b> <sup>57</sup>     | prospective cohort study <sup>¶</sup>     | Preprint            | Thailand                        | 03.-06.2022     | Omicron                   | Nothing to disclose                 | Non-industrial               | Safety: 7 days after each dose;<br>Blood samples: before 1st dose and 2nd dose, and 1 month after 2nd dose |
| <b>Wood et al</b> <sup>58</sup>            | Active surveillance study                 | Preprint            | Australia                       | 07.2021-05.2022 | NA <sup>  </sup>          | Nothing to disclose                 | Non-industrial               | Up to 3 days after each dose                                                                               |
| <b>Yoshida et al</b> <sup>59</sup>         | observational and historical cohort study | Peer-reviewed       | Japan                           | up to 06.2022   | NA <sup>  </sup>          | Potentially relevant <sup>§</sup>   | Non-industrial <sup>**</sup> | 7 days after each dose                                                                                     |
| <b>Zambrano et al</b> <sup>60</sup>        | Case-control, test-negative <sup>¶</sup>  | Peer-reviewed       | USA                             | 07.2021-04.2022 | Omicron                   | Potentially irrelevant <sup>‡</sup> | Non-industrial               | ≥121 days                                                                                                  |

**Study, participant and intervention characteristics (continued)**

| Study                                 | Age in years                                                              | Sex (% female)                                         | % seropositive or with known previous infection | Comorbidities (% of eg diabetes, cancer, etc) | Intervention           | Number of doses | Number assigned to intervention group      | Comparator                         | Number assigned to control group                                            |
|---------------------------------------|---------------------------------------------------------------------------|--------------------------------------------------------|-------------------------------------------------|-----------------------------------------------|------------------------|-----------------|--------------------------------------------|------------------------------------|-----------------------------------------------------------------------------|
| Amir et al <sup>14</sup>              | Range 5-10                                                                | % person days at risk:<br>IG: 48.3%<br>CG: 48.5%       | 0%                                              | NR                                            | BNT162b2               | 2               | NR; person-days at risk 2nd dose = 366,364 | BNT162b2 (3-7 days after 1st dose) | NR; person-days at risk internal control (3-7 days from 1st dose) = 367,168 |
| Bartsch et al A <sup>29</sup>         | Median 8 (range 6-11)                                                     | 50.0%                                                  | 0%                                              | NR                                            | mRNA-1273              | 2               | 12                                         | NR                                 | NR                                                                          |
| Bartsch et al B <sup>30</sup>         | Median 9 (range 5-11)                                                     | 34%                                                    | 0%                                              | NR                                            | BNT162b2               | 1-2             | 32                                         | NA                                 | NA                                                                          |
| Bloise et al <sup>31</sup>            | Mean: 114 months (SD: 4.24) <sup>††</sup>                                 | 55.9%                                                  | 6.4%                                            | 19.3%                                         | BNT162b2               | 2               | 569                                        | NA                                 | NA                                                                          |
| Capponi et al <sup>32</sup>           | Mean 8.2 (SD 3)                                                           | 47.0%                                                  | 10.5%                                           | 5% (non-allergic)<br>12.3% (allergy)          | BNT162b2               | 2               | 579                                        | NA                                 | NA                                                                          |
| Chantasrisawad et al <sup>33</sup>    | BNT162b2 (3 weeks): mean 8.4 (SD 1.8)<br>BNT162b2 (8 weeks): 8.9 (SD 1.8) | BNT162b2 (3 weeks): 41.1%<br>BNT162b2 (8 weeks): 59.3% | NR                                              | NR                                            | BNT162b2 (8 weeks)     | 2               | 56                                         | BNT162b2 (3 weeks)                 | 54                                                                          |
| Chemaitelly et al <sup>16</sup>       | Median 8 (IQR 8-12)                                                       | 49.9%                                                  | 0%                                              | 14.4%                                         | BNT162b2               | 2               | 18,728                                     | No vaccination                     | (IQR, 31-97 days)                                                           |
| Cinicola et al <sup>34</sup>          | Mean 8.1 (SD 2.3)                                                         | 37%                                                    | 11.1%                                           | NR                                            | BNT162b2               | 2               | 27                                         | NA                                 | NA                                                                          |
| Cocchio et al <sup>35</sup>           | NR                                                                        | NR                                                     | NR                                              | NR                                            | BNT162b2               | 2               | 40,318                                     | No vaccination                     | 81,895                                                                      |
| Cohen-Stavi et al <sup>17</sup>       | Median 8 (IQR 7-11)                                                       | 49.0%                                                  | 0%                                              | 8.0%                                          | BNT162b2               | 2               | 94,728                                     | No vaccination                     | 94,728                                                                      |
| Creech et al- Phase 2/3 <sup>13</sup> | Mean 8.5 (SD 1.65)                                                        | 49.2%                                                  | 8.6%                                            | NR                                            | mRNA-1273              | 2               | 3007                                       | Placebo                            | 995                                                                         |
| Creech et al- Phase 1 <sup>13</sup>   | Median 9 (range 6-11)                                                     | 48.7%                                                  | 7.4%                                            | NR                                            | mRNA-1273              | 2               | 380                                        | NA                                 | NA                                                                          |
| Dorabawila et al <sup>25</sup>        | IG: mean 8.3 (SD/range NR)<br>CG: mean 7.8 (SD/range NR)                  | NR                                                     | NR                                              | NR                                            | BNT162b2               | 2               | 365,502                                    | No vaccination                     | NR                                                                          |
| Doucette et al <sup>36</sup>          | Range 5-11                                                                | NR                                                     | NR                                              | NR                                            | BNT162b2,<br>mRNA-1273 | ≥1              | 464                                        | NA                                 | NA                                                                          |



| Study                              | Age in years                          | Sex (% female)         | % seropositive or with known previous infection | Comorbidities (% of eg diabetes, cancer, etc)                               | Intervention                            | Number of doses            | Number assigned to intervention group                 | Comparator     | Number assigned to control group |
|------------------------------------|---------------------------------------|------------------------|-------------------------------------------------|-----------------------------------------------------------------------------|-----------------------------------------|----------------------------|-------------------------------------------------------|----------------|----------------------------------|
| Elias et al <sup>37</sup>          | Median 8·0 (IQR 6·1-9·1)              | IG: 32·2%              | NR                                              | NR                                                                          | BNT162b2, mRNA-1273                     | 1-2                        | 87                                                    | NA             | NA                               |
| Flemming-Dutra et al <sup>20</sup> | Median 8 (range 5-11)                 | 49%                    | 25·45%                                          | NR                                                                          | BNT162b2                                | 2                          | 15,778                                                | No vaccination | 58,430                           |
| Fowlkes et al <sup>15</sup>        | Range 5-11                            | NR                     | NR                                              | 10·20%                                                                      | BNT162b2                                | 2                          | 640                                                   | No vaccination | 336                              |
| Girard et al <sup>38*</sup>        | Mean 8·8 (range 6-11)                 | 40·0%                  | 0%                                              | NR                                                                          | mRNA-1273                               | 2                          | 20                                                    | NA             | NA                               |
| Hartono et al <sup>39</sup>        | Average 13 (range 8-17) <sup>§§</sup> | 22·2%                  | NR                                              | NR                                                                          | BNT162b2                                | 2                          | 9                                                     | NA             | NA                               |
| Hause et al A <sup>40</sup>        | Mean 8 (range 5-11)                   | 49·7%                  | NR                                              | NR                                                                          | BNT162b2                                | 2                          | NR; approx. 16 million doses administered             | NA             | NA                               |
| Hause et al B <sup>41</sup>        | NR                                    | NR                     | NR                                              | NR                                                                          | BNT162b2                                | 3rd dose                   | 657,302                                               | NA             | NA                               |
| Hause et al C <sup>42</sup>        | Median 9 (range 5-11)                 | 49·0%                  | NR                                              | NR                                                                          | bivalent BNT162b2 or bivalent mRNA-1273 | 3rd-5th dose <sup>¶¶</sup> | 953,359                                               | NA             | NA                               |
| Hu et al <sup>43</sup>             | Range: 5-11                           | NR for age group       | NR                                              | NR                                                                          | BNT162b2                                | 1-3                        | NR, >1·8 million                                      | NA             | NA                               |
| Jang et al <sup>19</sup>           | Range: 5-11                           | IG: 49·5%<br>CG: 48·7% | IG: 20·5%<br>CG: 47·7%                          | NR                                                                          | BNT162b2                                | 2                          | 29,473                                                | No vaccination | 3,016,913                        |
| Joseph et al <sup>44</sup>         | Mean 9·18 (SD 1·97, range 5-11)       | 37·3%                  | 0%                                              | NR                                                                          | BNT162b2                                | 2                          | 110                                                   | NA             | NA                               |
| Kastl et al <sup>45</sup>          | Range 5-11                            | 44%                    | 10%                                             | 100% (inflammatory bowel disease)                                           | BNT162b2                                | 2-3                        | 118                                                   | NA             | NA                               |
| Khan et al <sup>18</sup>           | Mean 9 (SD 2)                         | 51%                    | Cases: 9%<br>Controls: 18%                      | 3-4%                                                                        | BNT162b2                                | 1-3                        | 69,383                                                | No vaccination | 101,420                          |
| Kim et al <sup>46</sup>            | Range 5-11                            | NR                     | NR                                              | NR                                                                          | BNT162b2                                | 1-2                        | NR, approx. 58,636 (number of administered 1st doses) | NA             | NA                               |
| Klein et al <sup>47</sup>          | NR                                    | 51·7%                  | NR                                              | 8·1% chronic respiratory conditions, 4·6% chronic non-respiratory condition | BNT162b2                                | 2                          | 582                                                   | No vaccination | 8599                             |
| Leung et al A <sup>48</sup>        | NR                                    | NR                     | NR                                              | NR                                                                          | BNT162b2                                | 1                          | 71,207                                                | No vaccination | 181,973                          |

| Study                                 | Age in years                                      | Sex (% female)         | % seropositive or with known previous infection | Comorbidities (% of eg diabetes, cancer, etc)                          | Intervention          | Number of doses | Number assigned to intervention group | Comparator        | Number assigned to control group |
|---------------------------------------|---------------------------------------------------|------------------------|-------------------------------------------------|------------------------------------------------------------------------|-----------------------|-----------------|---------------------------------------|-------------------|----------------------------------|
| Leung et al B <sup>49</sup>           | 9.1 (IQR 8.6-12.1)                                | 52%                    | NR                                              | Advanced chronic kidney disease (stage 3 or above)                     | BNT162b2              | 1-3             | 25                                    | NA                | NA                               |
| Malden et al <sup>50</sup>            | Median 8 (range 5-11)                             | 49%                    | 10%                                             | NR                                                                     | BNT162b2              | 1-2             | 7,077                                 | NA                | NA                               |
| Mattiuzzi et al <sup>26</sup>         | Range 5-11                                        | NR                     | NR                                              | NR                                                                     | BNT162b2 or mRNA-1273 | 2               | 1,204,468                             | No vaccination    | 2,291,598                        |
| Nygaard et al <sup>51</sup>           | Range 5-11                                        | NR                     | NR                                              | NR                                                                     | BNT162b2              | 1-2             | 208,088                               | NA                | 433,484                          |
| Piché-Renaud et al <sup>22</sup>      | IG: mean 7.82 (SD 2.05)<br>CG: mean 7.4 (SD 2.1)  | IG: 46.1%<br>CG: 48.3% | IG: 2.2%<br>CG: 3.6%                            | IG: 23.1%<br>CG: 22.8%                                                 | BNT162b2              | 1-2             | 8606                                  | No vaccination    | 4314                             |
| Price et al <sup>52</sup>             | Median 8 (IQR 6-10)                               | 44.0%                  | NR                                              | 82% of cases, and 73% of controls with at least 1 underlying condition | BNT162b2              | 2               | 70                                    | No vaccination    | 467                              |
| Ripabelli et al <sup>53</sup>         | Mean 8.9 (SD 1.8)                                 | 50.7%                  | 0.06%                                           | 6.6%                                                                   | BNT162b2              | 1-2             | 229                                   | NA                | NA                               |
| Rosa Duque et al <sup>54</sup>        | Range: 5-11                                       | 42.8%                  | NR                                              | NR                                                                     | BNT162b2              | 1               | 12                                    | No vaccination    | 956                              |
| Sacco et al <sup>21</sup>             | Range: 5-11                                       | 48.6%                  | 0%                                              | NR                                                                     | BNT162b2              | 2               | 1,063,035                             | No vaccination    | 176,8497                         |
| Shi et al <sup>27</sup>               | IG: median 9 (IQR 8-11)<br>CG: median 7 (IQR 8-9) | 45.6%                  | NR                                              | NR                                                                     | BNT162b2              | 2               | 48                                    | No vaccination    | 301                              |
| Simmons et al <sup>55</sup>           | NR                                                | NR                     | NR                                              | Immunocompromise d: 0.9% asthma: 1.9%                                  | BNT162b2 or mRNA-1273 | 1               | NR                                    | No vaccination    | NR                               |
| Stich et al <sup>56</sup>             | Range 5-11                                        | NR                     | NR                                              | 100% (chronic kidney disease including kidney transplant recipients)   | BNT162b2              | 2               | 43                                    | NA                | NA                               |
| Straus et al <sup>28</sup>            | NR; <12 <sup>III</sup>                            | 52.4%                  | NR                                              | NR                                                                     | mRNA-1273             | 1-3             | 36,782 Person-Years                   | No vaccination*** | NR                               |
| Suntronwong et al <sup>24</sup>       | Range 5-7                                         | 51.4%                  | 27.4%                                           | NR                                                                     | BNT162b2              | 1-3             | 89                                    | No vaccination    | 108                              |
| Tan et al <sup>23</sup>               | Median 8 (IQR 6-10)                               | 48.7%                  | NR                                              | NR                                                                     | BNT162b2              | 2               | 110,339                               | No vaccination    | 65,411                           |
| Walter et al- Phase 2/3 <sup>12</sup> | Mean 8.2 (SD 1.94)                                | 47.9%                  | 8.7%                                            | 20.5%                                                                  | BNT162b2              | 2               | 1528                                  | Placebo           | 757                              |

| Study                               | Age in years                                                           | Sex (% female)                 | % seropositive or with known previous infection | Comorbidities (% of eg diabetes, cancer, etc) | Intervention | Number of doses | Number assigned to intervention group | Comparator     | Number assigned to control group |
|-------------------------------------|------------------------------------------------------------------------|--------------------------------|-------------------------------------------------|-----------------------------------------------|--------------|-----------------|---------------------------------------|----------------|----------------------------------|
| Walter et al- Phase 1 <sup>12</sup> | Mean 7.9 (SD 1.89)                                                     | 68.7%                          | NR                                              | NR                                            | BNT162b2     | 2               | 16                                    | NA             | NA                               |
| Wanlapakorn et al <sup>57</sup>     | Mean 6.2 (SD 1.1)                                                      | 53.3%                          | 10%                                             | 10% (asthma, autism)                          | BNT162b2     | 2               | 30                                    | NA             | NA                               |
| Wood et al <sup>58</sup>            | Range: 5-11                                                            | Dose 1: 28.0%<br>Dose 2: 30.0% | NR                                              | Dose 1: 36.0%,<br>Dose 2: 39.0%               | BNT162b2     | 1-3             | Dose 1: 132,313<br>Dose 2: 79,542     | NA             | NA                               |
| Yoshida et al <sup>59</sup>         | Mean 8.8 (SD 1.9)                                                      | 48.7%                          | NR                                              | 51.3% (allergic disease)                      | BNT162b2     | 1-2             | 421                                   | NA             | NA                               |
| Zambrano et al <sup>60</sup>        | Cases: median 8.5 (IQR 6.9-10.3)<br>Controls: median 7.9 (IQR 6.7-9.7) | NR                             | NR                                              | NR                                            | BNT162b2     | 2               | 53                                    | No vaccination | 321                              |

NR: not reported, CG: control group, COI: conflicts of interest, IG: intervention group, IQR: inter quartile range, NA: not applicable, not reported, RCT: randomised controlled trial, SD standard deviation

\*Subsample of Creech et al. †Passive surveillance (registries used). ‡Less than 33% of authors and neither first-or last author declare relevant financial COIs (see column COI disclosures). §More than 33% of authors or first-or last author declare relevant financial COIs (see column COI disclosures). ¶Active surveillance. ¶¶Variant of concern not relevant in safety-only studies. \*\*Academia or governmental. ††If variants were not reported by the study, cases were differentiated by calendar time. ‡‡Average age indicated as it was reported. Age given in months. §§Average age indicated as it was reported. The data were extracted exclusively from cases between 5 and 11 years of age. ¶¶¶Bivalent booster, children had already received 2-4 doses before further booster. ¶¶¶¶This could also include children <5 years of age, but mRNA-1273 was not approved in younger children before the end of the observation period. \*\*\*Compared with expected rate from a population-based data estimate derived from individuals without a diagnosis of COVID-19 between March 2020 and January 2021 from the US Premier Healthcare Database.

## Overview of reported outcomes per study

| Study                                | Efficacy/Effectiveness     |                               |                                    |                      |                      |                                                       |                                                            | Immunogenicity                 |                  |                  | Safety           |                        |                              |                                    |                                    |
|--------------------------------------|----------------------------|-------------------------------|------------------------------------|----------------------|----------------------|-------------------------------------------------------|------------------------------------------------------------|--------------------------------|------------------|------------------|------------------|------------------------|------------------------------|------------------------------------|------------------------------------|
|                                      | COVID-19 related mortality | ICU admission due to COVID-19 | Hospital admission due to COVID-19 | Symptomatic COVID-19 | SARS-CoV-2 infection | Multisystem inflammatory syndrome in children (MIS-C) | Long-term effects of COVID-19 ('Long COVID' or Post-COVID) | Neutralizing antibody response | IgG response     | T-cell response  | Adverse events   | Serious adverse events | Reactogenicity -local events | Reactogenicity -systemic reactions | Adverse events of special interest |
| Amir et al <sup>14</sup>             | ..                         | ..                            | ..                                 | ..                   | Yes                  | ..                                                    | ..                                                         | ..                             | ..               | ..               | ..               | ..                     | ..                           | ..                                 | ..                                 |
| Bartsch et al A <sup>29</sup>        | ..                         | ..                            | ..                                 | ..                   | ..                   | ..                                                    | ..                                                         | Yes                            | ..               | ..               | ..               | ..                     | ..                           | ..                                 | ..                                 |
| Bartsch et al B <sup>30</sup>        | ..                         | ..                            | ..                                 | ..                   | ..                   | ..                                                    | ..                                                         | Yes <sup>†</sup>               | Yes <sup>†</sup> | Yes <sup>†</sup> | ..               | ..                     | ..                           | ..                                 | ..                                 |
| Bloise et al <sup>31</sup>           | ..                         | ..                            | ..                                 | ..                   | ..                   | ..                                                    | ..                                                         | ..                             | ..               | ..               | Yes <sup>‡</sup> | Yes <sup>‡</sup>       | ..                           | ..                                 | Yes <sup>‡</sup>                   |
| Capponi et al <sup>32</sup>          | ..                         | ..                            | ..                                 | ..                   | ..                   | ..                                                    | ..                                                         | ..                             | ..               | ..               | Yes <sup>‡</sup> | Yes <sup>‡</sup>       | Yes <sup>‡</sup>             | Yes <sup>‡</sup>                   | Yes <sup>‡</sup>                   |
| Chantarisawad et al <sup>33</sup>    | ..                         | ..                            | ..                                 | ..                   | ..                   | ..                                                    | ..                                                         | Yes                            | Yes              | ..               | ..               | ..                     | ..                           | ..                                 | ..                                 |
| Chemaitelly et al <sup>16</sup>      | Yes                        | Yes                           | Yes                                | ..                   | Yes                  | ..                                                    | ..                                                         | ..                             | ..               | ..               | ..               | ..                     | ..                           | ..                                 | ..                                 |
| Cinicola et al <sup>34</sup>         | ..                         | ..                            | ..                                 | ..                   | ..                   | ..                                                    | ..                                                         | Yes                            | Yes              | Yes              | ..               | ..                     | ..                           | ..                                 | ..                                 |
| Cocchio et al <sup>61</sup>          | ..                         | ..                            | ..                                 | ..                   | Yes                  | ..                                                    | ..                                                         | ..                             | ..               | ..               | ..               | ..                     | ..                           | ..                                 | ..                                 |
| Cohen-Stavi et al <sup>17</sup>      | ..                         | ..                            | ..                                 | Yes                  | Yes                  | ..                                                    | ..                                                         | ..                             | ..               | ..               | ..               | ..                     | ..                           | ..                                 | ..                                 |
| Creech et al-Phase 2/3 <sup>13</sup> | ..                         | ..                            | ..                                 | Yes                  | Yes                  | Yes                                                   | ..                                                         | ..                             | ..               | ..               | ..               | ..                     | ..                           | ..                                 | ..                                 |
| Creech et al-Phase 1 <sup>13</sup>   | ..                         | ..                            | ..                                 | ..                   | ..                   | ..                                                    | ..                                                         | ..                             | ..               | ..               | Yes              | Yes                    | Yes                          | Yes                                | Yes                                |
| Dorabawila et al <sup>25</sup>       | ..                         | ..                            | Yes                                | ..                   | Yes <sup>§</sup>     | ..                                                    | ..                                                         | ..                             | ..               | ..               | ..               | ..                     | ..                           | ..                                 | ..                                 |
| Doucette et al <sup>36</sup>         | ..                         | ..                            | ..                                 | ..                   | ..                   | ..                                                    | ..                                                         | ..                             | Yes              | ..               | ..               | ..                     | ..                           | ..                                 | ..                                 |
| Elias et al <sup>37</sup>            | ..                         | ..                            | ..                                 | ..                   | ..                   | ..                                                    | ..                                                         | ..                             | ..               | ..               | Yes <sup>‡</sup> | ..                     | ..                           | ..                                 | ..                                 |
| Fleming-Dutra et al <sup>20</sup>    | ..                         | ..                            | ..                                 | Yes                  | ..                   | ..                                                    | ..                                                         | ..                             | ..               | ..               | ..               | ..                     | ..                           | ..                                 | ..                                 |
| Fowlkes et al <sup>15</sup>          | ..                         | ..                            | ..                                 | ..                   | Yes                  | ..                                                    | ..                                                         | ..                             | ..               | ..               | ..               | ..                     | ..                           | ..                                 | ..                                 |
| Hartono et al <sup>39</sup>          | ..                         | ..                            | ..                                 | ..                   | ..                   | ..                                                    | ..                                                         | ..                             | ..               | ..               | ..               | ..                     | ..                           | ..                                 | Yes <sup>‡</sup>                   |

| Study                            | Efficacy/Effectiveness     |                               |                                    |                      |                      |                                                       |                                                            | Immunogenicity                 |              |                 | Safety           |                        |                              |                                    |                                    |
|----------------------------------|----------------------------|-------------------------------|------------------------------------|----------------------|----------------------|-------------------------------------------------------|------------------------------------------------------------|--------------------------------|--------------|-----------------|------------------|------------------------|------------------------------|------------------------------------|------------------------------------|
|                                  | COVID-19 related mortality | ICU admission due to COVID-19 | Hospital admission due to COVID-19 | Symptomatic COVID-19 | SARS-CoV-2 infection | Multisystem inflammatory syndrome in children (MIS-C) | Long-term effects of COVID-19 ('Long COVID' or Post-COVID) | Neutralizing antibody response | IgG response | T-cell response | Adverse events   | Serious adverse events | Reactogenicity -local events | Reactogenicity -systemic reactions | Adverse events of special interest |
| Hause et al A <sup>40</sup>      | ..                         | ..                            | ..                                 | ..                   | ..                   | ..                                                    | ..                                                         | ..                             | ..           | ..              | Yes <sup>‡</sup> | Yes <sup>‡</sup>       | Yes <sup>‡</sup>             | Yes <sup>‡</sup>                   | Yes <sup>‡</sup>                   |
| Hause et al B <sup>41</sup>      | ..                         | ..                            | ..                                 | ..                   | ..                   | ..                                                    | ..                                                         | ..                             | ..           | ..              | Yes <sup>‡</sup> | Yes <sup>‡</sup>       | Yes <sup>‡</sup>             | Yes <sup>‡</sup>                   | Yes <sup>‡</sup>                   |
| Hause et al C <sup>42</sup>      | ..                         | ..                            | ..                                 | ..                   | ..                   | ..                                                    | ..                                                         | ..                             | ..           | ..              | Yes <sup>‡</sup> | Yes <sup>‡</sup>       | Yes <sup>‡</sup>             | Yes <sup>‡</sup>                   | Yes <sup>‡</sup>                   |
| Hu et al <sup>43</sup>           | ..                         | ..                            | ..                                 | ..                   | ..                   | ..                                                    | ..                                                         | ..                             | ..           | ..              | ..               | ..                     | ..                           | ..                                 | Yes <sup>‡</sup>                   |
| Jang et al <sup>19</sup>         | ..                         | ..                            | ..                                 | Yes                  | Yes                  | ..                                                    | ..                                                         | ..                             | ..           | ..              | ..               | ..                     | ..                           | ..                                 | ..                                 |
| Joseph et al <sup>44</sup>       | ..                         | ..                            | ..                                 | ..                   | ..                   | ..                                                    | ..                                                         | Yes                            | Yes          | ..              | ..               | Yes                    | Yes                          | Yes                                | ..                                 |
| Kastl et al <sup>45</sup>        | ..                         | ..                            | ..                                 | ..                   | ..                   | ..                                                    | ..                                                         | ..                             | Yes          | ..              | ..               | ..                     | ..                           | ..                                 | ..                                 |
| Khan et al <sup>18</sup>         | ..                         | ..                            | ..                                 | Yes                  | Yes                  | ..                                                    | ..                                                         | ..                             | ..           | ..              | ..               | ..                     | ..                           | ..                                 | ..                                 |
| Kim et al <sup>46</sup>          | ..                         | ..                            | ..                                 | ..                   | ..                   | ..                                                    | ..                                                         | ..                             | ..           | ..              | Yes <sup>‡</sup> | Yes <sup>‡</sup>       | Yes <sup>‡</sup>             | Yes <sup>‡</sup>                   | Yes <sup>‡</sup>                   |
| Klein et al <sup>47</sup>        | ..                         | ..                            | Yes                                | ..                   | ..                   | ..                                                    | ..                                                         | ..                             | ..           | ..              | ..               | ..                     | ..                           | ..                                 | ..                                 |
| Leung et al A <sup>48</sup>      | ..                         | ..                            | ..                                 | ..                   | Yes <sup>¶</sup>     | ..                                                    | ..                                                         | ..                             | ..           | ..              | ..               | ..                     | ..                           | ..                                 | ..                                 |
| Leung et al B <sup>49</sup>      | ..                         | ..                            | ..                                 | ..                   | ..                   | ..                                                    | ..                                                         | Yes                            | Yes          | Yes             | Yes              | Yes                    | Yes                          | Yes                                | ..                                 |
| Malden et al <sup>50</sup>       | ..                         | ..                            | ..                                 | ..                   | ..                   | ..                                                    | ..                                                         | ..                             | ..           | ..              | Yes <sup>‡</sup> | ..                     | Yes <sup>‡</sup>             | Yes <sup>‡</sup>                   | ..                                 |
| Mattiuzzi et al <sup>26</sup>    | ..                         | Yes <sup>§</sup>              | Yes <sup>§</sup>                   | ..                   | ..                   | ..                                                    | ..                                                         | ..                             | ..           | ..              | ..               | ..                     | ..                           | ..                                 | ..                                 |
| Nygaard et al <sup>62</sup>      | ..                         | ..                            | ..                                 | ..                   | ..                   | ..                                                    | ..                                                         | ..                             | ..           | ..              | ..               | ..                     | ..                           | ..                                 | Yes <sup>‡</sup>                   |
| Girard et al <sup>38*</sup>      | ..                         | ..                            | ..                                 | ..                   | ..                   | ..                                                    | ..                                                         | Yes                            | ..           | ..              | ..               | ..                     | ..                           | ..                                 | ..                                 |
| Piché-Renaud et al <sup>22</sup> | ..                         | ..                            | Yes                                | Yes                  | ..                   | ..                                                    | ..                                                         | ..                             | ..           | ..              | ..               | ..                     | ..                           | ..                                 | ..                                 |
| Price et al <sup>52</sup>        | Yes                        | Yes                           | Yes                                | ..                   | ..                   | ..                                                    | ..                                                         | ..                             | ..           | ..              | ..               | ..                     | ..                           | ..                                 | ..                                 |
| Ripabelli et al <sup>53</sup>    | ..                         | ..                            | ..                                 | ..                   | ..                   | ..                                                    | ..                                                         | ..                             | ..           | ..              | Yes <sup>‡</sup> | Yes <sup>‡</sup>       | ..                           | ..                                 | ..                                 |
| Rosa Duque et al <sup>54</sup>   | ..                         | ..                            | Yes <sup>¶</sup>                   | ..                   | ..                   | ..                                                    | ..                                                         | ..                             | ..           | ..              | ..               | ..                     | ..                           | ..                                 | ..                                 |
| Sacco et al <sup>21</sup>        | Yes                        | Yes                           | Yes                                | Yes                  | Yes                  | ..                                                    | ..                                                         | ..                             | ..           | ..              | ..               | ..                     | ..                           | ..                                 | ..                                 |
| Shi et al <sup>27</sup>          | Yes <sup>§</sup>           | Yes <sup>§</sup>              | Yes <sup>§</sup>                   | ..                   | ..                   | ..                                                    | ..                                                         | ..                             | ..           | ..              | ..               | ..                     | ..                           | ..                                 | ..                                 |
| Simmons et al <sup>55</sup>      | ..                         | ..                            | Yes <sup>¶</sup>                   | ..                   | ..                   | ..                                                    | ..                                                         | ..                             | ..           | ..              | ..               | ..                     | ..                           | ..                                 | ..                                 |

| Study                                | Efficacy/Effectiveness     |                               |                                    |                      |                      |                                                       |                                                            | Immunogenicity                 |              |                 | Safety           |                        |                              |                                    |                                    |
|--------------------------------------|----------------------------|-------------------------------|------------------------------------|----------------------|----------------------|-------------------------------------------------------|------------------------------------------------------------|--------------------------------|--------------|-----------------|------------------|------------------------|------------------------------|------------------------------------|------------------------------------|
|                                      | COVID-19 related mortality | ICU admission due to COVID-19 | Hospital admission due to COVID-19 | Symptomatic COVID-19 | SARS-CoV-2 infection | Multisystem inflammatory syndrome in children (MIS-C) | Long-term effects of COVID-19 ('Long COVID' or Post-COVID) | Neutralizing antibody response | IgG response | T-cell response | Adverse events   | Serious adverse events | Reactogenicity -local events | Reactogenicity -systemic reactions | Adverse events of special interest |
| Stich et al <sup>56</sup>            | ..                         | ..                            | ..                                 | ..                   | ..                   | ..                                                    | ..                                                         | Yes                            | ..           | ..              | ..               | ..                     | ..                           | ..                                 | ..                                 |
| Straus et al <sup>28</sup>           | ..                         | ..                            | ..                                 | ..                   | ..                   | ..                                                    | ..                                                         | ..                             | ..           | ..              | ..               | ..                     | ..                           | ..                                 | Yes <sup>‡</sup>                   |
| Suntronwong et al <sup>24</sup>      | ..                         | ..                            | ..                                 | ..                   | Yes <sup>§</sup>     | ..                                                    | ..                                                         | ..                             | ..           | ..              | ..               | ..                     | ..                           | ..                                 | ..                                 |
| Tan et al <sup>23</sup>              | ..                         | ..                            | Yes                                | Yes                  | ..                   | ..                                                    | ..                                                         | ..                             | ..           | ..              | ..               | ..                     | ..                           | ..                                 | ..                                 |
| Walter et al-Phase 2/3 <sup>12</sup> | Yes                        | Yes                           | Yes                                | Yes                  | ..                   | Yes                                                   | ..                                                         | Yes                            | ..           | ..              | Yes              | Yes                    | Yes                          | Yes                                | Yes                                |
| Walter et al-Phase 1 <sup>12</sup>   | ..                         | ..                            | ..                                 | ..                   | ..                   | ..                                                    | ..                                                         | Yes                            | ..           | ..              | Yes <sup>‡</sup> | Yes <sup>‡</sup>       | Yes <sup>‡</sup>             | Yes <sup>‡</sup>                   | Yes <sup>‡</sup>                   |
| Wanlapakorn et al <sup>57</sup>      | ..                         | ..                            | ..                                 | ..                   | ..                   | ..                                                    | ..                                                         | Yes                            | Yes          | ..              | ..               | ..                     | Yes                          | Yes                                | ..                                 |
| Wood et al <sup>58</sup>             | ..                         | ..                            | ..                                 | ..                   | ..                   | ..                                                    | ..                                                         | ..                             | ..           | ..              | Yes <sup>‡</sup> | ..                     | Yes <sup>‡</sup>             | Yes <sup>‡</sup>                   | Yes <sup>‡</sup>                   |
| Yoshida et al <sup>59</sup>          | ..                         | ..                            | ..                                 | ..                   | ..                   | ..                                                    | ..                                                         | ..                             | ..           | ..              | ..               | ..                     | ..                           | Yes <sup>‡</sup>                   | ..                                 |
| Zambrano et al <sup>60</sup>         | ..                         | ..                            | ..                                 | ..                   | ..                   | Yes                                                   | ..                                                         | ..                             | ..           | ..              | ..               | ..                     | ..                           | ..                                 | ..                                 |

\*Subsample of Creech et al. †Outcome data presented graphically only. ‡Safety data from single-arm studies were not included in meta-analysis. §Estimates excluded from meta-analysis due to critical risk of bias (see Appendix 2). ¶Estimates were excluded from the meta-analysis since a single-dose scheme was examine.

## **Vaccine effectiveness**

### **Vaccine effectiveness against pre-Omicron SARS-CoV-2 variants**

#### **SARS-CoV-2 infection**

One NRSI assessed VE after the first dose against Delta-infections (VE 56%, 95% CI 50 to 61, N=61,350).<sup>18</sup> VE after two doses against SARS-CoV-2 infections with pre-Omicron virus variants (not specified) was 73% (95% CI 41% to 87%, N=3497, CoE: moderate) in the identified RCT, and 85% (95% CI 80 to 89, N=59,786, CoE: moderate) in a NRSI against Delta-infections. Booster vaccinations were not recommended for children 5-11 years before the Omicron era.

#### **Symptomatic COVID-19**

Single-dose VE against symptomatic COVID-19 was 49% (95% CI 37 to 59, 1 NRSI, N=61,350) in the Delta-era.<sup>18</sup> VE against symptomatic COVID-19 caused by pre-Omicron variants after complete basic immunization (i.e. 2 doses) was 86.7% (95% CI 58.1% to 95.8%, 2 RCTs, N=5465, CoE: moderate) in RCTs and 84% (95% CI 75 to 91, 1 NRSI, N=59,786, CoE: moderate) in an observational study.

#### **Hospitalisation due to COVID-19**

Hospitalisations due to COVID-19 were reported in one RCT (pre-Omicron era), with no cases in either group.<sup>12</sup>

#### **COVID-19 related mortality**

COVID-19 related mortality was reported in one RCT (pre-Omicron era). No deaths were reported for either group.<sup>12</sup>

#### **Multisystem inflammatory syndrome in children (MIS-C)**

There were zero cases of MIS-C reported in the RCTs.

#### **Long-term effects of COVID-19 ('Long COVID' or Post-COVID)**

We identified no data on the effect of COVID-19 vaccination on long COVID, neither from RCTs nor from observational studies.

The summary of our vaccine effectiveness findings against pre-Omicron SARS-CoV-2 variants comprising relative and absolute effects and GRADE assessments are presented per outcome in the table below.

## Summary of vaccine effectiveness findings against pre-Omicron SARS-CoV-2 variants

| <b>Population:</b> Children, aged 5-11 years<br><b>Intervention:</b> EMA-approved COVID-19 mRNA vaccines (BNT162b2, 2 doses à 10 µg, 21 days apart OR mRNA-1273, 2 doses à 50 µg, 28 days apart)<br><b>Comparison:</b> Placebo or no intervention<br><b>Outcomes:</b> Vaccine efficacy/effectiveness<br><b>Setting:</b> Pre-Omicron SARS-CoV-2 variants |        |                                              |                                           |                                                |                                              |                               |                                   |
|---------------------------------------------------------------------------------------------------------------------------------------------------------------------------------------------------------------------------------------------------------------------------------------------------------------------------------------------------------|--------|----------------------------------------------|-------------------------------------------|------------------------------------------------|----------------------------------------------|-------------------------------|-----------------------------------|
| Outcomes                                                                                                                                                                                                                                                                                                                                                | Design | Absolute effect* with placebo/no vaccination | Absolute effect* with vaccination         | Relative effect† (95% CI)                      | Timing of outcome measurement                | No. of participants (studies) | Certainty of the evidence (GRADE) |
| <b>SARS-CoV-2 infection (PCR- or antigen-test confirmed)</b>                                                                                                                                                                                                                                                                                            | RCT    | 1641 per 100,000                             | <b>443 per 100,000</b><br>(213 to 968)    | VE 73% (41-87);<br>IRR 0.27 (0.13-0.59)        | Median 51 days after 2 <sup>nd</sup> dose    | 3497 <sup>13</sup>            | ⊕⊕⊕○<br>MODERATE <sup>a</sup>     |
|                                                                                                                                                                                                                                                                                                                                                         | NRSI   | 17,491 per 100,000                           | <b>2624 per 100,000</b><br>(1574 to 3498) | VE 85% (80-89);<br>VE-ratio 0.15 (0.11-0.20)   | Up to 3 months after 2 <sup>nd</sup> dose    | 59,786 <sup>18</sup>          | ⊕⊕⊕○<br>MODERATE <sup>b</sup>     |
| <b>Symptomatic COVID-19</b>                                                                                                                                                                                                                                                                                                                             | RCT    | 1,319 per 100,000                            | <b>175 per 100,000</b><br>(55 to 553)     | VE 86.7% (58.1-95.8);<br>IRR 0.13 (0.042-0.42) | Median 50-70 days after 2 <sup>nd</sup> dose | 5465 <sup>12,13</sup>         | ⊕⊕⊕○<br>MODERATE <sup>c</sup>     |
|                                                                                                                                                                                                                                                                                                                                                         | NRSI   | NR <sup>‡</sup>                              | <b>N.E.</b>                               | VE 84% (75-91);<br>VE-ratio 0.16 (0.09-0.25)   | Up to 3 months after 2 <sup>nd</sup> dose    | 59,786 <sup>18</sup>          | ⊕⊕⊕○<br>MODERATE <sup>b</sup>     |
| <b>Hospitalisation due to COVID-19</b>                                                                                                                                                                                                                                                                                                                  | RCT    | N.E., 0 cases observed                       | <b>N.E.</b> , 0 cases observed            | VE N.E., 0 cases observed                      | Median 2-3 months after 2 <sup>nd</sup> dose | 2285 <sup>12</sup>            | ⊕⊕○○<br>LOW <sup>d</sup>          |
|                                                                                                                                                                                                                                                                                                                                                         | NRSI   | NA                                           | NA                                        | VE NA                                          | NA                                           | 0                             | NA                                |
| <b>COVID-19 related mortality</b>                                                                                                                                                                                                                                                                                                                       | RCT    | N.E., 0 cases observed                       | <b>N.E.</b> , 0 cases observed            | VE N.E., 0 cases observed                      | Median 2-3 months after 2 <sup>nd</sup> dose | 2285 <sup>(12)</sup>          | ⊕⊕○○<br>LOW <sup>d</sup>          |
|                                                                                                                                                                                                                                                                                                                                                         | NRSI   | NA                                           | NA                                        | VE NA                                          | NA                                           | 0                             | NA                                |
| <b>Multisystem inflammatory syndrome in children (MIS-C)</b>                                                                                                                                                                                                                                                                                            | RCT    | N.E., 0 cases observed                       | <b>N.E.</b> , 0 cases observed            | VE N.E., 0 cases observed                      | Median 50-70 days after 2 <sup>nd</sup> dose | 5465 <sup>12,13</sup>         | ⊕⊕○○<br>LOW <sup>d</sup>          |
|                                                                                                                                                                                                                                                                                                                                                         | NRSI   | NA                                           | NA                                        | VE NA                                          | NA                                           | 0                             | NA                                |
| <b>Long-term effects of COVID-19 ('Long COVID' or Post-COVID)</b>                                                                                                                                                                                                                                                                                       | RCT    | NA                                           | NA                                        | VE NA                                          | NA                                           | 0                             | NA                                |
|                                                                                                                                                                                                                                                                                                                                                         | NRSI   | NA                                           | NA                                        | VE NA                                          | NA                                           | 0                             | NA                                |



**Abbreviations:**

**CI:** confidence interval, **EMA:** European Medicines Agency, **GRADE:** Grading of Recommendations, Assessment, Development and Evaluation, **NA:** not applicable, **N.E.:** not estimable, **NR:** not reported, **NRSI:** non-randomized study of intervention, **PCR:** polymerase chain reaction, **RCT:** randomized controlled trial, **SARS-CoV-2:** Severe acute respiratory syndrome coronavirus type 2, **VE:** vaccine efficacy/effectiveness

**Footnotes:**

\*Note: The estimated absolute effect refers to the difference between the observed baseline risk reported for the unvaccinated control group and the risk for experiencing an outcome after vaccination. The absolute effect estimated for the intervention group is based on the relative effect magnitude of an effect and the baseline risk; i.e. (observed risk /100,000 unvaccinated children) \* relative effect. † Note: Relative effects (vaccine effectiveness [VE] or risk ratios [RR]) were derived from meta-analysis, or of one study if no pooled estimate was available. ‡Note: Crude number of symptomatic COVID-19 cases in unvaccinated children not reported.

**GRADE Working Group grades of evidence:**

**High certainty:** we are very confident that the true effect lies close to that of the estimate of the effect.

**Moderate certainty:** we are moderately confident in the effect estimate: the true effect is likely to be close to the estimate of the effect, but there is the possibility that it is substantially different.

**Low certainty:** our confidence in the effect estimate is limited: the true effect may be substantially different from the estimate of the effect.

**Very low certainty:** we have very little confidence in the effect estimate: the true effect is likely to be substantially different from the estimate of effect.

**Support for Judgements:**

<sup>a</sup>One level for serious imprecision (one study with few events).

<sup>b</sup>One level for serious imprecision (data of only one study).

<sup>c</sup>One level for serious imprecision (artificial precision induced by analysis method).

<sup>d</sup>Two levels for very serious imprecision (zero or few events).

## Vaccine effectiveness against Omicron SARS-CoV-2 variant

### Vaccine effectiveness against SARS-CoV-2 infections and symptomatic COVID-19 over time

| Study                                    | Timepoint of first measurement after full vaccination (T <sub>1</sub> ) | VE (95% CI) at T <sub>1</sub> | Timepoint of last measurement after full vaccination (T <sub>2</sub> ) | VE (95% CI) at T <sub>2</sub> |
|------------------------------------------|-------------------------------------------------------------------------|-------------------------------|------------------------------------------------------------------------|-------------------------------|
| <b>SARS-CoV-2 Infections</b>             |                                                                         |                               |                                                                        |                               |
| Chemaitelly 2022 <sup>16</sup>           | 1 month                                                                 | 49.6%<br>(28.5 to 64.5)       | 4+ months                                                              | -9.5%<br>(-76.8 to 32.2)      |
| Cocchio 2022 <sup>61</sup>               | 14 to 34 days                                                           | 53%<br>(51 to 55)             | 70+ days                                                               | 23%<br>(20 to 26)             |
| Dorabawila 2022 <sup>25</sup>            | 14 to 20 days                                                           | 52%<br>(49 to 53)             | 42 to 48 days                                                          | -41%<br>(-65 to -29)          |
| Khan 2022 <sup>18</sup>                  | 1 month after dose 2                                                    | 45%<br>(41 to 49)             | 9+ months after dose 2                                                 | -2%<br>(-32 to 20)            |
| Khan 2022 <sup>18</sup>                  | 1 month after dose 3                                                    | 58%<br>(50 to 46)             | 4 months after dose 3                                                  | 53%<br>(-5 to 79)             |
| Jang 2023 <sup>19</sup>                  | 15 to 30 days                                                           | 57.6%<br>(51.6 to 62.8)       | 61 to 90 days                                                          | 41.2%<br>(34.3 to 47.4)       |
| <b>Symptomatic COVID-19</b>              |                                                                         |                               |                                                                        |                               |
| Piché-Renaud 2022 <sup>22</sup>          | 7 to 29 days                                                            | 67%<br>(60 to 72)             | 90+ days                                                               | 35%<br>(21 to 46)             |
| Sacco 2022 <sup>21</sup>                 | 15 to 28 days                                                           | 29.3%<br>(28.1 to 30.4)       | 43 to 84 days                                                          | 21.2%<br>(19.7 to 22.7)       |
| Khan 2022 (BA.4/5 subline) <sup>18</sup> | 3 months after dose 2                                                   | 7%<br>(-3 to 16)              | 9+ months after dose 2                                                 | -4%<br>(-37 to 21)            |
| Khan 2022 (BA.4/5 subline) <sup>18</sup> | 3 months after dose 3                                                   | 56%<br>(47 to 63)             | 3 to 5 months after dose 3                                             | 48%<br>(24 to 65)             |

### **Single-dose vaccine effectiveness**

Two studies each assessed VE after the first dose against Omicron-infections (VE 18.9%, 95% CI 0.2 to 34.2),<sup>18,49</sup> against symptomatic COVID-19 (VE 9.9%, 95% CI 3.6 to 15.7),<sup>18,22</sup> and against hospitalizations due to COVID-19 (VE 55.2%, 95% CI 16.1 to 76.1).<sup>54,55</sup>

## Vaccine safety

### Overview of reported safety outcomes

| Study                                        | Outcome definition                                                                                             | Follow-up                                       | Participants in intervention group with event | Participants in control group with event | Relative effect (95% CI) |
|----------------------------------------------|----------------------------------------------------------------------------------------------------------------|-------------------------------------------------|-----------------------------------------------|------------------------------------------|--------------------------|
| <b>Serious adverse events</b>                |                                                                                                                |                                                 |                                               |                                          |                          |
| <b>Bloise et al<sup>31</sup></b>             | Any SAEs as per standard definition*                                                                           | Any Dose - ≤20 days                             | 0/569                                         | /                                        | /                        |
| <b>Capponi et al<sup>32</sup></b>            | Any SAEs as per standard definition*, including myocarditis and anaphylaxis                                    | Dose 2 - ≤2 weeks                               | 0/579                                         | /                                        | /                        |
| <b>Creech et al - Phase 1<sup>13</sup></b>   | Any SAEs as per standard definition*                                                                           | Any Dose - ≤28 days                             | 2/380                                         | /                                        | /                        |
|                                              |                                                                                                                | Any Dose - >28 days                             | 3/380                                         | /                                        | /                        |
| <b>Creech et al - Phase 2/3<sup>13</sup></b> | Any SAEs as per standard definition*                                                                           | Any Dose - median of 82 days (IQR 14-94)        | 6/3007                                        | 2/995                                    | RR 0.99 (0.20 to 4.91)   |
| <b>haHause et al A<sup>40</sup></b>          | Any SAEs as per standard definition*†                                                                          | Any Dose - ≤21 days                             | 194/ approx. 16 Million                       | /                                        | /                        |
|                                              |                                                                                                                | Deaths†                                         | 4/ approx. 16 Million                         | /                                        | /                        |
| <b>Hause et al B<sup>41</sup></b>            | Any SAEs as per standard definition*†                                                                          | Dose 3 - ≤10 weeks                              | 3/657,302                                     | /                                        | /                        |
|                                              |                                                                                                                | Deaths†                                         | 0/657,302                                     | /                                        | /                        |
| <b>Hause et al C<sup>42</sup></b>            | Any SAEs as per standard definition*†                                                                          | 3rd-5th Dose - January 1st, 2023                | 2/861,251                                     | /                                        | /                        |
|                                              |                                                                                                                | Deaths†                                         | 0/861,251                                     | /                                        | /                        |
| <b>Joseph et al<sup>44</sup></b>             | Any SAE                                                                                                        | Any Dose                                        | 0/110                                         | /                                        | /                        |
| <b>Kim et al<sup>46</sup></b>                | Any SAEs as per standard definition*                                                                           | Any Dose - July 2nd, 2022                       | 2/94,518                                      | /                                        | /                        |
| <b>Leung et al B<sup>49</sup></b>            | Any SAE                                                                                                        | Any Dose                                        | 0/25                                          | /                                        | /                        |
| <b>Ripabelli et al<sup>53</sup></b>          | SAEs (fever ≥39°C, paresthesia, clustered rash)                                                                | Dose 1 - up to 7 to 10 days after vaccination   | 3/229                                         | /                                        | /                        |
|                                              |                                                                                                                | Dose 2 - up to 7 to 10 days after vaccination   | 1/199                                         | /                                        | /                        |
| <b>Walter et al – Phase 1<sup>12</sup></b>   | Any SAEs as per standard definition*                                                                           | Any Dose - median of 2- 3 months (range 0-2- 5) | 0/16                                          | /                                        | /                        |
| <b>Walter et al – Phase 2/3<sup>12</sup></b> | Any SAEs as per standard definition*                                                                           | Any Dose - median of 2- 3 months (range 0-2- 5) | 1/1518                                        | 1/750                                    | RR 0.49 (0.03 to 7.89)   |
| <b>Adverse events of special interest</b>    |                                                                                                                |                                                 |                                               |                                          |                          |
| <b>Bloise et al<sup>31</sup></b>             | Myocarditis or pericarditis                                                                                    | Any Dose - ≤20 days                             | 0/569                                         | /                                        | /                        |
| <b>Capponi et al<sup>32</sup></b>            | Myocarditis or pericarditis                                                                                    | Dose 2 - ≤2 weeks                               | 0/579                                         | /                                        | /                        |
| <b>Creech et al - Phase 1<sup>13</sup></b>   | Any AE (serious or nonserious) of scientific and medical concern specific to the Sponsor's product or program‡ | Any Dose - ≤28 days                             | 0/380                                         | /                                        | /                        |
|                                              |                                                                                                                | Any Dose - >28 days                             | 5/380                                         | /                                        | /                        |
| <b>Creech et al - Phase 2/3<sup>13</sup></b> | Any AE (serious or nonserious) of scientific and medical concern specific to the Sponsor's product or program‡ | Any Dose - median of 82 days (IQR 14-94)        | 4/3007                                        | 2/995                                    | RR 0.66 (0.12 to 3.61)   |
| <b>Hause et al A<sup>40</sup></b>            | Verified myocarditis reports†                                                                                  | Any Dose - ≤21 days                             | 17/ approx. 16 Million                        | /                                        | /                        |
|                                              |                                                                                                                | MIS-C, CDC case definition†                     | 21/ approx. 16 Million                        | /                                        | /                        |
| <b>Hause et al B<sup>41</sup></b>            | Confirmed MIS-C§                                                                                               | Any Dose - ≤21 days                             | 4/384,905                                     | /                                        | /                        |
|                                              |                                                                                                                | Myocarditis                                     | Dose 3 - ≤10 weeks                            | 0/657,302                                | /                        |

| Study                                  | Outcome definition                                                                                                                                                                                  | Follow-up                                       | Participants in intervention group with event | Participants in control group with event        | Relative effect (95% CI) |
|----------------------------------------|-----------------------------------------------------------------------------------------------------------------------------------------------------------------------------------------------------|-------------------------------------------------|-----------------------------------------------|-------------------------------------------------|--------------------------|
| Hause et al C <sup>42</sup>            | Myocarditis                                                                                                                                                                                         | 3rd-5th Dose - January 1st, 2023                | 0/861,251                                     | /                                               | /                        |
| Hu et al <sup>43</sup>                 | Myocarditis/Pericarditis <sup>¶</sup>                                                                                                                                                               | Any Dose - ≤21 days                             | <11/603,585                                   | /                                               | /                        |
|                                        | Myocarditis/Pericarditis <sup>  </sup>                                                                                                                                                              | Any Dose - ≤21 days                             | <11/572,742                                   | /                                               | /                        |
|                                        | Myocarditis/Pericarditis <sup>**</sup>                                                                                                                                                              | Any Dose - ≤21 days                             | <11/ 605,143                                  | /                                               | /                        |
| Kim et al <sup>46</sup>                | Myocarditis/pericarditis                                                                                                                                                                            | Any Dose - July 2nd, 2022                       | 1/94,518                                      | /                                               | /                        |
| Hartono et al <sup>39</sup>            | Allergic reactions                                                                                                                                                                                  | Dose 2 <sup>††</sup>                            | 1/9                                           | /                                               | /                        |
| Nygaard et al <sup>51</sup>            | Myopericarditis                                                                                                                                                                                     | Any Dose - ≤97 days                             | 1/ 208,088                                    | 9/433,484 <sup>‡‡</sup>                         | RR 4.6 (0.1 to 156.1)    |
| Straus et al <sup>28</sup>             | Myocarditis and myopericarditis (Brighton collaboration case definition) <sup>§§</sup>                                                                                                              | Any Dose - February 15th, 2022                  | 0/49,043 Person-Years                         | expected: 4/100,000 Person- Years <sup>¶¶</sup> | NA                       |
| Walter et al – Phase 1 <sup>12</sup>   | Myocarditis, pericarditis, hypersensitivity, or anaphylaxis                                                                                                                                         | Any Dose - median of 2- 3 months (range 0-2- 5) | 0/16                                          | /                                               | /                        |
| Walter et al – Phase 2/3 <sup>12</sup> | Myocarditis, pericarditis, hypersensitivity, or anaphylaxis                                                                                                                                         | Any Dose - median of 2.3 months (range 0-2.5)   | 0/1501                                        | 0/741                                           | NA                       |
| Wood et al <sup>58</sup>               | Myocarditis or pericarditis                                                                                                                                                                         | Dose 1 - ≤3 days                                | 0/132,313                                     | /                                               | /                        |
|                                        |                                                                                                                                                                                                     | Dose 2 - ≤3 days                                | 0/79,542                                      | /                                               | /                        |
|                                        |                                                                                                                                                                                                     | Dose 3 - ≤3 days                                | 0/59                                          | /                                               | /                        |
| <b>Local reactions</b>                 |                                                                                                                                                                                                     |                                                 |                                               |                                                 |                          |
| Capponi et al <sup>32</sup>            | Any local reaction (pain, tenderness, itch, redness)                                                                                                                                                | Dose 1 - NR                                     | 314/579                                       | /                                               | /                        |
|                                        |                                                                                                                                                                                                     | Dose 2 - ≤2 weeks                               | 309/579                                       | /                                               | /                        |
| Creech et al - Phase 1 <sup>13</sup>   | Solicited local adverse reactions (injection site pain/tenderness, erythema (redness swelling/induration (hardness), groin or underarm swelling or tenderness ipsilateral to the side of injection) | Dose 1 - ≤7 days                                | 339/378                                       | /                                               | /                        |
|                                        |                                                                                                                                                                                                     | Dose 2 - ≤7 days                                | 355/379                                       | /                                               | /                        |
| Creech et al - Phase 2/3 <sup>13</sup> | Solicited local adverse reactions (injection site pain/tenderness, erythema (redness swelling/induration (hardness), groin or underarm swelling or tenderness ipsilateral to the side of injection) | Dose 1 - ≤7 days                                | 2818/3005                                     | 481/994                                         | RR 1.94 (1.82 to 2.07)   |
|                                        |                                                                                                                                                                                                     | Dose 2 - ≤7 days                                | 2847/2986                                     | 491/968                                         | RR 1.88 (1.77 to 2.00)   |
| Hause et al A <sup>40</sup>            | Local reactions (Injection site reactions were: itching, injection site pain, redness, or swelling)                                                                                                 | Dose 1 - ≤7 days                                | 27,716/48,795                                 | /                                               | /                        |
|                                        |                                                                                                                                                                                                     | Dose 2 - ≤7 days                                | 22,396/39,416                                 | /                                               | /                        |
| Hause et al B <sup>41</sup>            | Local reactions (Injection site reactions were: itching, injection site pain, redness, or swelling)                                                                                                 | Dose 3 - ≤7 days                                | 2226/3249                                     | /                                               | /                        |
|                                        |                                                                                                                                                                                                     | 3rd-5th Dose - ≤7 days                          | 1740/2647                                     | /                                               | /                        |
| Hause et al C <sup>42</sup>            | Local reactions (Injection site reactions were: itching, injection site pain, redness, or swelling)                                                                                                 | 3rd-5th Dose - ≤7 days                          | 1740/2647                                     | /                                               | /                        |
| Joseph et al <sup>44</sup>             | Any local reaction (pain at injection site, erythema, edema, itching)                                                                                                                               | Dose 1 ≤7 days                                  | 37/110                                        | /                                               | /                        |

| Study                                        | Outcome definition                                                                                                                 | Follow-up                             | Participants in intervention group with event                                                                                       | Participants in control group with event | Relative effect (95% CI) |
|----------------------------------------------|------------------------------------------------------------------------------------------------------------------------------------|---------------------------------------|-------------------------------------------------------------------------------------------------------------------------------------|------------------------------------------|--------------------------|
|                                              | Any local reaction (pain at injection site, erythema, edema, itching)                                                              | Dose 2 ≤7 days                        | 20/110                                                                                                                              | /                                        | /                        |
| <b>Kim et al<sup>46</sup></b>                | Local reactions (pain, redness, swelling, itching, urticaria, and others (not further defined)) <sup>  </sup>                      | Dose 1 - ≤7 days                      | 336/1025                                                                                                                            | /                                        | /                        |
|                                              |                                                                                                                                    | Dose 2 - ≤7 days                      | 148/541                                                                                                                             | /                                        | /                        |
| <b>Leung et al B<sup>49</sup></b>            | Local reactions (headache, fatigue, myalgia, nausea, diarrhea, and others (not further defined))                                   | Dose 1-3                              | Number of events not reported, but frequencies presented graphically (see figure 5 of the referenced manuscript)                    | /                                        | /                        |
| <b>Malden et al<sup>50</sup></b>             | Local reactions (fatigue, headache, myalgia, fever, nausea, rash, chills)                                                          | Dose 1 - ≤14 days                     | 3140/6247                                                                                                                           | /                                        | /                        |
|                                              |                                                                                                                                    | Dose 2 - ≤14 days                     | 1113/3401                                                                                                                           | /                                        | /                        |
| <b>Walter et al – Phase 1<sup>12</sup></b>   | Local reactions (injection site pain, tenderness, redness, or swelling)                                                            | Dose 1 - ≤7 days                      | 14 <sup>***</sup> /16                                                                                                               | /                                        | /                        |
|                                              |                                                                                                                                    | Dose 2 - ≤7 days                      | 14 <sup>***</sup> /16                                                                                                               | /                                        | /                        |
| <b>Walter et al – Phase 2/3<sup>12</sup></b> | Local reactions (injection site pain, tenderness, redness, or swelling)                                                            | Dose 1 - ≤7 days                      | 1150/1511                                                                                                                           | 254/749                                  | RR 2.24 (2.02 to 2.49)   |
|                                              |                                                                                                                                    | Dose 2 - ≤7 days                      | 1096/1501                                                                                                                           | 237/741                                  | RR 2.28 (2.05 to 2.55)   |
| <b>Wanlapakorn et al.<sup>57</sup></b>       | Local reactions (mostly pain at injection site, redness, swelling)                                                                 | Dose 1 - ≤7 days,<br>Dose 2 - ≤7 days | Overall number of participants with events not reported, but for each observed reaction (see figure 2 of the referenced manuscript) | /                                        | /                        |
| <b>Wood et al<sup>58</sup></b>               | Any local reaction (pain, itching, redness, swelling)                                                                              | Dose 1 - ≤3 days                      | 28,997/132,313                                                                                                                      | /                                        | /                        |
|                                              |                                                                                                                                    | Dose 2 - ≤3 days                      | 18,560/79,542                                                                                                                       | /                                        | /                        |
|                                              |                                                                                                                                    | Dose 3 - ≤3 days                      | 16/59                                                                                                                               | /                                        | /                        |
| <b>Systemic reactions</b>                    |                                                                                                                                    |                                       |                                                                                                                                     |                                          |                          |
| <b>Capponi et al<sup>32</sup></b>            | Any systemic reaction (asthenia, headache, fever >37,5C, joint pain, abdominal pain, chills, rash)                                 | Dose 1 - NR                           | 166/579                                                                                                                             | /                                        | /                        |
|                                              |                                                                                                                                    | Dose 2 - ≤2 weeks                     | 198/579                                                                                                                             | /                                        | /                        |
| <b>Creech et al - Phase 1<sup>13</sup></b>   | Solicited systemic adverse reactions (Solicited systemic reactions were: fever, irritability/crying, sleepiness, loss of appetite) | Dose 1 - ≤7 days                      | 207/378                                                                                                                             | /                                        | /                        |
|                                              |                                                                                                                                    | Dose 2 - ≤7 days                      | 284/379                                                                                                                             | /                                        | /                        |
| <b>Creech et al - Phase 2/3<sup>13</sup></b> | Solicited systemic adverse reactions (Solicited systemic reactions were: fever, irritability/crying, sleepiness, loss of appetite) | Dose 1 - ≤7 days                      | 1743/3005                                                                                                                           | 519/994                                  | RR 1.11 (1.04 to 1.19)   |
|                                              |                                                                                                                                    | Dose 2 - ≤7 days                      | 2332/2986                                                                                                                           | 485/968                                  | RR 1.56 (1.46 to 1.66)   |

| Study                                         | Outcome definition                                                                                                                                                                                                                            | Follow-up                          | Participants in intervention group with event                                                                                       | Participants in control group with event | Relative effect (95% CI) |
|-----------------------------------------------|-----------------------------------------------------------------------------------------------------------------------------------------------------------------------------------------------------------------------------------------------|------------------------------------|-------------------------------------------------------------------------------------------------------------------------------------|------------------------------------------|--------------------------|
| <b>Hause et al A</b> <sup>40</sup>            | Systemic reactions (abdominal pain, myalgia, chills, diarrhea, fatigue, fever, headache, joint pain, nausea, rash, or vomiting) <sup>†††</sup>                                                                                                | Dose 1 - ≤7 days                   | 20,006/48,795                                                                                                                       | /                                        | /                        |
|                                               |                                                                                                                                                                                                                                               | Dose 2 - ≤7 days                   | 16,161/39,416                                                                                                                       | /                                        | /                        |
| <b>Hause et al B</b> <sup>41</sup>            | Systemic reactions (abdominal pain, myalgia, chills, diarrhea, fatigue, fever, headache, joint pain, nausea, rash, or vomiting) <sup>†††</sup>                                                                                                | Dose 3 - ≤7 days                   | 1482/3249                                                                                                                           | /                                        | /                        |
| <b>Hause et al C</b> <sup>42</sup>            | Systemic reactions (abdominal pain, myalgia, chills, diarrhea, fatigue, fever, headache, joint pain, nausea, rash, or vomiting) <sup>†††</sup>                                                                                                | 3rd-5th Dose - ≤7 days             | 1215/2647                                                                                                                           | /                                        | /                        |
| <b>Joseph et al</b> <sup>44</sup>             | Any systemic reaction (fatigue, fever, myalgia, headache, lymphadenopathy)                                                                                                                                                                    | Dose 1 ≤7 days                     | 12/110                                                                                                                              | /                                        | /                        |
|                                               |                                                                                                                                                                                                                                               | Dose 2 ≤7 days                     | 7/110                                                                                                                               | /                                        | /                        |
| <b>Kim et al</b> <sup>46</sup>                | Systemic reactions (fever, chills, headache, joint pain, myalgia, fatigue or tiredness, nausea, vomiting, diarrhea, abdominal pain, rash, armpit tenderness, chest pain, heart palpitations, and others (not further defined)) <sup>†††</sup> | Dose 1 - ≤7 days                   | 275/1025                                                                                                                            | /                                        | /                        |
|                                               |                                                                                                                                                                                                                                               | Dose 2 - ≤7 days                   | 121/541                                                                                                                             | /                                        | /                        |
| <b>Leung et al B</b> <sup>49</sup>            | Systemic reactions (headache, fatigue, myalgia, nausea, diarrhea, and others (not further defined))                                                                                                                                           | Dose 1-3                           | Number of events not reported, but frequencies presented graphically (see figure 5 of the referenced manuscript)                    | /                                        | /                        |
| <b>Malden et al</b> <sup>50</sup>             | Systemic reactions (fatigue, headache, myalgia, fever, nausea, rash, chills) <sup>†</sup>                                                                                                                                                     | Dose 1 - ≤14 days                  | 2 176/6 247                                                                                                                         | /                                        | /                        |
|                                               |                                                                                                                                                                                                                                               | Dose 2 - ≤14 days                  | 1 076/3 401                                                                                                                         | /                                        | /                        |
| <b>Walter et al – Phase 1</b> <sup>12</sup>   | Systemic reactions (fever, vomiting, diarrhea, headache, fatigue/tiredness, chills, new or worsened muscle or joint pain)                                                                                                                     | Dose 1 - ≤7 days                   | 8 <sup>§§§</sup> /16                                                                                                                | /                                        | /                        |
|                                               |                                                                                                                                                                                                                                               | Dose 2 - ≤7 days                   | 8 <sup>§§§</sup> /16                                                                                                                | /                                        | /                        |
| <b>Walter et al – Phase 2/3</b> <sup>12</sup> | Systemic reactions (fever, vomiting, diarrhea, headache, fatigue/tiredness, chills, new or worsened muscle or joint pain)                                                                                                                     | Dose 1 - ≤7 days                   | 715/1511                                                                                                                            | 334/749                                  | RR 1·06 (0·96 to 1·17)   |
|                                               |                                                                                                                                                                                                                                               | Dose 2 - ≤7 days                   | 771/1501                                                                                                                            | 272/741                                  | RR 1·40 (1·26 to 1·56)   |
| <b>Wanlapakorn et al.</b> <sup>57</sup>       | Systemic reactions (fever, headache, myalgia, nausea, vomiting, diarrhea)                                                                                                                                                                     | Dose 1 - ≤7 days, Dose 2 - ≤7 days | Overall number of participants with events not reported, but for each observed reaction (see figure 2 of the referenced manuscript) | /                                        | /                        |
| <b>Wood et al</b> <sup>58</sup>               | Any systemic reactions                                                                                                                                                                                                                        | Dose 1 - ≤3 days                   | 13,066/132,313                                                                                                                      | /                                        | /                        |

| Study                                        | Outcome definition                                                                                                                                                                         | Follow-up                                     | Participants in intervention group with event | Participants in control group with event | Relative effect (95% CI) |
|----------------------------------------------|--------------------------------------------------------------------------------------------------------------------------------------------------------------------------------------------|-----------------------------------------------|-----------------------------------------------|------------------------------------------|--------------------------|
|                                              | (myalgia/arthralgia, headache, fever >38C, chills, fatigue, gastrointestinal symptoms)                                                                                                     |                                               |                                               |                                          |                          |
|                                              |                                                                                                                                                                                            | Dose 2 - ≤3 days                              | 10,234/79,542                                 | /                                        | /                        |
|                                              |                                                                                                                                                                                            | Dose 3 - ≤3 days                              | 7/59                                          | /                                        | /                        |
| <b>Yoshida et al<sup>59</sup></b>            | Systemic adverse reactions (Headache, diarrhea, dizziness, fatigue, muscle pain, nausea, fever, and medication use)                                                                        | Any dose - ≤7 days                            | 190/421                                       | /                                        | /                        |
| <b>UNSOLICITED ADVERSE EVENTS</b>            |                                                                                                                                                                                            |                                               |                                               |                                          |                          |
| <b>Bloise et al<sup>31</sup></b>             | Any AE                                                                                                                                                                                     | Any Dose                                      | NR/569 <sup>***</sup>                         | /                                        | /                        |
| <b>Capponi et al<sup>32</sup></b>            | Any AE                                                                                                                                                                                     | Dose 1 - NR                                   | 332/579                                       | /                                        | /                        |
|                                              |                                                                                                                                                                                            | Dose 2 - ≤2 weeks                             | 309/579                                       |                                          |                          |
| <b>Creech et al - Phase 1<sup>13</sup></b>   | Unsolicited AEs irrespective of causality                                                                                                                                                  | Any Dose - ≤28 days                           | 119/380                                       | /                                        | /                        |
| <b>Creech et al - Phase 2/3<sup>13</sup></b> | Unsolicited AEs irrespective of causality                                                                                                                                                  | Any Dose - ≤28 days                           | 716/3007                                      | 194/995                                  | RR 1.56 (1.46to 1.66)    |
| <b>Elias et al<sup>37</sup></b>              | Any adverse reactions                                                                                                                                                                      | Dose 1                                        | 30/87                                         | /                                        | /                        |
|                                              |                                                                                                                                                                                            | Dose 2                                        | 32/73                                         | /                                        | /                        |
| <b>Hause et al A<sup>40</sup></b>            | Any reported adverse events (incl. Serious) <sup>‡</sup>                                                                                                                                   | Up to 19.12.2021                              | 7379/ approx. 16 Million                      | /                                        | /                        |
|                                              | Any health impact (child was unable to complete normal daily activities, missed school, or received care from a medical professional because of new symptoms or conditions) <sup>†††</sup> | Dose 1 - ≤7 days                              | 7515/48,795                                   | /                                        | /                        |
|                                              |                                                                                                                                                                                            | Dose 2 - ≤7 days                              | 4515/29,899                                   | /                                        | /                        |
| <b>Hause et al B<sup>41</sup></b>            | Any reported adverse events (incl. Serious) <sup>‡</sup>                                                                                                                                   | Dose 3 - ≤10 weeks                            | 581/657,302                                   | /                                        | /                        |
|                                              | Any health impact (child was unable to complete normal daily activities, missed school, or received care from a medical professional because of new symptoms or conditions) <sup>†††</sup> | Dose 3 - ≤7 days                              | 546/3249                                      |                                          |                          |
| <b>Hause et al C<sup>42</sup></b>            | Any reported adverse events (incl. Serious) <sup>‡</sup>                                                                                                                                   | 3rd-5th Dose - January 1st, 2023              | 847/861,251                                   | /                                        | /                        |
|                                              | Any health impact (child was unable to complete normal daily activities, missed school, or received care from a medical professional because of new symptoms or conditions) <sup>†††</sup> | 3rd-5th Dose - January 1st, 2023              | 506/2647                                      | /                                        | /                        |
| <b>Kim et al<sup>46</sup></b>                | Non-serious AE (redness at the injection site, pain, swelling, myalgia, fever, headache, chills, and others) <sup>    </sup>                                                               | Any Dose - July 2nd, 2022                     | 61/94,518                                     | /                                        | /                        |
| <b>Leung et al B<sup>49</sup></b>            | Any AE                                                                                                                                                                                     | Any Dose                                      | 2/25                                          | /                                        | /                        |
| <b>Malden et al<sup>50</sup></b>             | Any AE                                                                                                                                                                                     | Dose 1 - ≤14 days                             | 3934/6247                                     | /                                        | /                        |
|                                              |                                                                                                                                                                                            | Dose 2 - ≤14 days                             | 1601/3401                                     | /                                        | /                        |
| <b>Ripabelli et al<sup>53</sup></b>          | Any AE – mild (Injection site pain, redness, or swelling, tiredness/ asthenia, headache,                                                                                                   | Dose 1 - up to 7 to 10 days after vaccination | 187/229                                       | /                                        | /                        |



| Study                                        | Outcome definition                                                                                                                                           | Follow-up                                     | Participants in intervention group with event | Participants in control group with event | Relative effect (95% CI) |
|----------------------------------------------|--------------------------------------------------------------------------------------------------------------------------------------------------------------|-----------------------------------------------|-----------------------------------------------|------------------------------------------|--------------------------|
|                                              | chills, nausea, insomnia, restlessness, decreased appetite, abdominal pain, and fever <38°C)                                                                 |                                               |                                               |                                          |                          |
|                                              |                                                                                                                                                              | Dose 2 - up to 7 to 10 days after vaccination | 139/199                                       | /                                        | /                        |
|                                              | Any AE – moderate (Lymphadenopathy, muscle/joint pain, localized rash, vomiting, diarrhea, pain in a limb other than that injected, and fever ≥38 and <39°C) | Dose 1 - up to 7 to 10 days after vaccination | 9/229                                         | /                                        | /                        |
|                                              | Any health impact                                                                                                                                            | Dose 2 - up to 7 to 10 days after vaccination | 21/199                                        | /                                        | /                        |
| <b>Walter et al – Phase 1<sup>12</sup></b>   | Any AE                                                                                                                                                       | Dose 1 - ≤1 month                             | 7/16                                          | /                                        | /                        |
| <b>Walter et al – Phase 2/3<sup>12</sup></b> | Any AE                                                                                                                                                       | Dose 2 - ≤1 month                             | 166/1518                                      | 69/750                                   | RR 1.40 (1.26to 1.56)    |
| <b>Wood et al<sup>58</sup></b>               | Any AE                                                                                                                                                       | Dose 1 - ≤3 days                              | 33,597/132,313                                | /                                        | /                        |
|                                              |                                                                                                                                                              | Dose 2 - ≤3 days                              | 22,115/79,542                                 | /                                        | /                        |
|                                              |                                                                                                                                                              | Dose 3 - ≤3 days                              | 17/59                                         | /                                        | /                        |

AE: adverse event; CDC: Centers for Disease Control; CI: confidence interval; IQR: inter quartile range; MIS-C: Multisystem Inflammatory Syndrome in Children associated with COVID-19; NA: not applicable; NR: not reported.

\*Any AE that leads to death, is life-threatening, requires inpatient hospitalisation or prolongation of existing hospitalisation, leads to persistent or significant incapacity or substantial disruption of the ability to conduct normal life functions, congenital anomaly or birth defects, or medically important events. †Obtained from Vaccine Adverse Events Reporting System (VAERS). ‡A comprehensive list of investigated AESIs is provided in table 39 of the EMA Assessment report. §Obtained from US Centers for disease control Vaccine Safety Datalink (VSD). ¶CVS Health database. || Optum Pre-adjudicated claims database. \*\* HealthCore database. †† All participants experienced an allergic reaction after dose 1. ††† Background incidences (2014-2018). §§ Level 1, definitive case; level 2, probable case; level 3, possible case; level 4, reported events with insufficient evidence; level 5, not a case of myocarditis/pericarditis. ¶¶ Expected cases based on background incidence rates from the US Premier Healthcare Database. |||| Text Message-Based Vaccine Safety Surveillance System. \*\*\* 14/16 reported injection site pain; unclear whether remaining 2 participants had experienced other/additional local reactions. †††† Obtained from Vaccine Safety Datalink (v-safe). ††††† Text Message-Based Vaccine Safety Surveillance System. §§§ 8/16 reported fatigue; unclear whether the other 8 participants had experienced other/additional systemic reactions. ¶¶¶ Events were recorded on days 2, 7, and 20 after each dose, however not over the whole period. ||||| COVID-19 vaccination management system (CVMS, a web-based passive vaccine safety surveillance system).

## **Additional outcomes**

### **ICU admission due to COVID-19**

Data on ICU admissions were reported in five NRSIs. Two of these are not further described due to the critical risk of bias.<sup>26,27</sup> Evidence from a hospital-based, case–control, test-negative study resulted in 5/70 ICU admission for fully vaccinated and 55/467 for unvaccinated patients.<sup>52</sup> A cohort study from Italy observed zero ICU admissions in n=1,063,035 vaccinated and 15 ICU admissions in 1,768,497 unvaccinated children.<sup>21</sup> Another cohort study from Qatar observed no cases, in either vaccinated or unvaccinated children (n=18728 per group).<sup>16</sup> Adjusted effect estimates were not available.

## Immunogenicity

### Overview of reported immunogenicity outcomes

| Study                                       | Serological test                            | Definition of seroresponse                                                           | Variant        | Participants with seroresponse                                | GMT (95% CI)                                                                             |
|---------------------------------------------|---------------------------------------------|--------------------------------------------------------------------------------------|----------------|---------------------------------------------------------------|------------------------------------------------------------------------------------------|
| <b>Neutralising antibody response</b>       |                                             |                                                                                      |                |                                                               |                                                                                          |
| <b>Bartsch et al</b> <sup>29</sup>          | Pseudovirus Neutralising Assay [pNT50]      | NR                                                                                   | Wildtype       | NR/9                                                          | 934.7<br>(198.4 to 1671.1)                                                               |
|                                             |                                             |                                                                                      | Beta           | NR/7                                                          | 43.4<br>(25.2 to 61.5)                                                                   |
|                                             |                                             |                                                                                      | Delta          | NR/9                                                          | 262.0<br>(88.2 to 435.8)                                                                 |
|                                             |                                             |                                                                                      | Omicron        | NR/7                                                          | 47.6<br>(19.2 to 76.1)                                                                   |
| <b>Chantasrisawad et al</b> <sup>33</sup>   | sVNT: surrogate virus neutralization test   | % inhibition                                                                         | Omicron (BA.1) | NR                                                            | BNT162b2 (8 weeks):<br>54.0 (47.6 to 61.0)<br>BNT162b2 (3 weeks):<br>16.7 (11.7 to 23.8) |
|                                             | pVNT: pseudovirus neutralization test (BA)  | ID50                                                                                 | Omicron (BA.2) | NR                                                            | BNT162b2 (8 weeks):<br>254 (205 to 313)<br>BNT162b2 (3 weeks):<br>41 (25 to 68)          |
| <b>Cinicola et al</b> <sup>34</sup>         | NR                                          | NR                                                                                   | Wildtype       | NR/27                                                         | 1024 (1024 to 1024)                                                                      |
| <b>Creech et al Phase 2/3</b> <sup>13</sup> | Pseudovirus Neutralising Assay [PsVNA ID50] | Increase in titers by a factor of at least 4 from baseline*                          | Wildtype       | 313/316                                                       | 1610.2<br>(1456.6 to 1780.0)                                                             |
| <b>Creech et al Phase 1</b> <sup>13</sup>   |                                             |                                                                                      | Wildtype       | 67/67                                                         | 1204.6<br>(986.7 to 1470.8)                                                              |
|                                             |                                             |                                                                                      | Delta          | 133/134                                                       | 756.4<br>(651.0 to 878.8)                                                                |
| <b>Girard et al</b> <sup>38†</sup>          | Pseudovirus Neutralising Assay [PsVNA ID50] | NR <sup>‡</sup>                                                                      | Omicron        | 20/20                                                         | 95<br>(NR <sup>§</sup> )                                                                 |
|                                             |                                             |                                                                                      | Wildtype       | 20/20                                                         | 2102<br>(NR <sup>§</sup> )                                                               |
| <b>Leung et al B</b> <sup>49</sup>          | Surrogate virus neutralization test (sVNT)  | NR                                                                                   | Wildtype       | 73.9% and 93.8% were seropositive after doses 2 and 3         | Responses rose with every dose: 29.7%, 51.7% and 78.6%                                   |
|                                             | Surrogate virus neutralization test (sVNT)  | NR                                                                                   | Omicron        | lower sVNT% compared to wildtype                              | Responses rose slightly from dose 2 to 3 but remained <30%: 18.5% and 27.2%              |
| <b>Stich et al</b> <sup>56</sup>            | live virus neutralization assay             | clear cytopathic effect of ≥10% of that of the virus control well (cells plus virus) | Omicron        | all children:<br>32/43<br>kidney transplant recipients: 14/23 | NR                                                                                       |
| <b>Walter et al Phase 2/3</b> <sup>12</sup> | SARS-CoV-2 mNeonGreen virus                 | Increase in titers by a factor of at least                                           | Delta          | 262/264                                                       | 1197.6<br>(1106.1 to 1296.6)                                                             |

| Study                                     | Serological test                                           | Definition of seroresponse                   | Variant  | Participants with seroresponse                 | GMT (95% CI)                                                                                                                                |
|-------------------------------------------|------------------------------------------------------------|----------------------------------------------|----------|------------------------------------------------|---------------------------------------------------------------------------------------------------------------------------------------------|
| <b>Walter et al Phase 1</b> <sup>12</sup> | microneutralization assay-NT50                             | 4 from baseline*                             | Delta    | NR/15                                          | 4163<br>(2584.7 to 6704)                                                                                                                    |
| <b>IgG antibody response</b>              |                                                            |                                              |          |                                                |                                                                                                                                             |
| <b>Cinicola et al</b> <sup>34</sup>       | DiaSorin Liaison SARS-CoV-2 TrimericS IgG assay, BAU/ml    | NR                                           | NR       | NR/27                                          | 8380 (5120 to 11800)                                                                                                                        |
|                                           | Anti-SARS-CoV-2 NCP ELISA assay                            | NR                                           | NR       | NR/27                                          | 0.45 (0.22 to 1.3)                                                                                                                          |
| <b>Chantasrisawad et al</b> <sup>33</sup> | Anti-S-RBD IgG against the ancestral strain, BAU/mL        | NR                                           | Omicron  | NR                                             | BNT162b2 (8 weeks):<br>2119 (1900 to 2364)<br>BNT162b2 (3 weeks):<br>2242 (2041 to 2463)                                                    |
| <b>Doucette et al</b> <sup>36</sup>       | Abbott ARCHITECT SARS-CoV-2 nucleocapsid IgG assay         | Sample calibration (S/C) value of $\geq 1.4$ | Omicron  | Visit 3 <sup>†</sup> : 0/21<br>Visit 4: 98/290 | NR                                                                                                                                          |
|                                           | Abbott ARCHITECT SARS-CoV-2 spike IgG II RUO assay         | $\geq 50.0$ arbitrary units (AU)/mL          | Omicron  | Visit 3: 21/21<br>Visit 4: 290/290             | NR                                                                                                                                          |
| <b>Joseph et al</b> <sup>44</sup>         | SARS-CoV-2 IgG II Quant (Abbott, IL, USA); day 180; BAU/IU | NR                                           | Omicron  | NR                                             | all children:<br>1076 (712.3 to 1624.0)<br>Infected children:<br>1479.0 (878.2 to 2490.0)<br>Uninfected children:<br>535.3 (288.4 to 933.6) |
| <b>Kastl et al</b> <sup>45</sup>          | LabCorp Cov2Quant IgG Assay, mg/mL, (median, IQR)          | Results of 1.0 mg/mL or greater              | NR       | 25/25                                          | 28.0<br>(18.0 to 47.0)                                                                                                                      |
| <b>Leung et al B</b> <sup>49</sup>        | S-RBD IgG                                                  | NR                                           | Wildtype | NR                                             | RBD IgG responses rose with every dose: 0.63, 1.35 and 2.23                                                                                 |
| <b>Wanlapakorn et al</b> <sup>57</sup>    | Receptor-binding domain (RBD) (Total RBD Ig) (U/mL)        | NR                                           | NR       | NR                                             | pre dose 1: 0.4 (0.4 to 0.4)<br>pre dose 2: 74.7 (55.3 to 101.0)<br>post dose 2: 10654.0 (8477.0 to 13390.0)                                |
|                                           | Anti-RBD IgG (BAU/mL)                                      | NR                                           | NR       | NR                                             | pre dose 1: 0.5 (0.4 to 0.7)<br>pre dose 2: 94.8 (74.7 to 120.0)<br>post dose 2: 2872.0 (2193.0 to 3763.0)                                  |
| <b>T-cell response</b>                    |                                                            |                                              |          |                                                |                                                                                                                                             |
| <b>Cinicola et al</b> <sup>34</sup>       | Standard IFN gamma ELISpo, SFC/10 <sup>6</sup> PBMCs       | NR                                           | Wildtype | NR/27                                          | 563 SFC/10 <sup>6</sup> (154 to 1985)                                                                                                       |
|                                           |                                                            |                                              | Omicron  | NR/27                                          | 27 SFC/10 <sup>6</sup> (5 to 140)                                                                                                           |
| <b>Leung et al B</b> <sup>49</sup>        | Based on PBMC                                              | NR                                           | Wildtype | NR                                             | CD4+ 0.010%, 0.010%, 0.028%<br>CD8+ 0.010%, 0.005%, 0.012%                                                                                  |
|                                           |                                                            | NR                                           | Omicron  | NR                                             | T cells not diminished compared to wildtype                                                                                                 |

BAU: binding antibody units; CI: confidence interval; GMT: geometric mean titer; IU: international unit; IQR: inter quartile range; NR: not reported; PBMC: Peripheral blood mononuclear cells, SFC: spot-forming cells.

\*If the baseline measurement was less than the lower limit of quantitation, seroresponse by titers that were at least 4 times the lower limit of quantitation.

†Subgroup analysis of Creech et al. ‡Possible that same definition was used as for Creech et al. as data of a random sub-sample were analysed. §Plotted in graph (figure 1 of the original paper); significantly lower for omicron than against wildtype. ¶Longitudinal study; first visit after implementation of vaccination for children 5-11 years of age.

## Subgroup analyses

| Subgroup category                                   | Subgroup defined in study                                        | Results                                                                                                                                                                                                                                                                                                                                                                                                                                                                                                                                                                                                                                                                                                                                                                                                                                                                                               | Comments / interpretation                                                                                                                                                                                                                                       |
|-----------------------------------------------------|------------------------------------------------------------------|-------------------------------------------------------------------------------------------------------------------------------------------------------------------------------------------------------------------------------------------------------------------------------------------------------------------------------------------------------------------------------------------------------------------------------------------------------------------------------------------------------------------------------------------------------------------------------------------------------------------------------------------------------------------------------------------------------------------------------------------------------------------------------------------------------------------------------------------------------------------------------------------------------|-----------------------------------------------------------------------------------------------------------------------------------------------------------------------------------------------------------------------------------------------------------------|
| <b>Vaccine type</b>                                 | mRNA                                                             | NA                                                                                                                                                                                                                                                                                                                                                                                                                                                                                                                                                                                                                                                                                                                                                                                                                                                                                                    | -Only mRNA vaccines approved in European Union.                                                                                                                                                                                                                 |
| <b>Product</b>                                      | -BNT162b2 (Comirnaty)<br>-mRNA-1273 (Spikevax)                   | -See VE against pre-Omicron SARS-CoV-2 variants:<br>-Walter et al <sup>12</sup> vs. Creech et al <sup>13</sup> : Symptomatic COVID-19<br><br>-See Figure 3:<br>-Walter et al <sup>12</sup> vs. Creech et al <sup>13</sup> : SAEs, Local and systemic reactions, AEs                                                                                                                                                                                                                                                                                                                                                                                                                                                                                                                                                                                                                                   | -No relevant differences and overlapping 95% CIs for all outcomes except local reactions.<br>-BNT162b2 <sup>12</sup> may have a higher risk than mRNA-1273 <sup>13</sup> for local reactions after the first and second dose (Figure 3).                        |
| <b>Incomplete/ complete/ booster dosing regimen</b> | 1 dose (incomplete) vs. 2 doses (complete) vs. 3 doses (booster) | Omicron period:<br>-SARS-CoV-2 Infections: VE (95% CI)<br>1 dose:<br>Leung et al A <sup>48</sup> : 33 (3.0 to 53.3)<br>Khan et al <sup>18</sup> : 14 (6 to 21)<br>RE meta-analysis: 18.9 (0.2 to 34.2)<br>2 doses: RE meta-analysis (Figure 2):<br>41.6 (28.1 to 52.6)<br>3 doses:<br>Khan et al <sup>18</sup> : 55 (50 to 60)Symptomatic COVID-19:<br>1 dose:<br>Piché-Renaud et al <sup>22</sup> : 13 (4 to 21)<br>Khan et al.: 7 (-4 to 16)<br>RE meta-analysis: 9.9 (3.6 to 15.7)<br>2 doses: RE Model (Figure 2):<br>36.2 (21.5 to 48.2)<br>3 doses:<br>Khan et al <sup>18</sup> : 61 (55 to 67)<br><br>Hospitalisation:<br>1 dose:<br>Piché-Renaud et al <sup>22</sup> : 53 (NA, NA)<br>Simmons et al <sup>55</sup> : 34.0 (-45.0 to 73.0)<br>Rosa Duque et al <sup>54</sup> : 65.6 (38.2 to 82.5)<br>RE meta-analysis: 55.2 (16.1 to 76.1)<br>2 doses RE Model (Figure 2): 75.3 (68.0 to 81.0) | -Complete vaccination and booster vaccination may be associated with higher VE against SARS-CoV-2 infections, symptomatic COVID-19, and hospitalisation than incomplete vaccination (1 dose).<br>-Results are imprecise and should be interpreted with caution. |
| <b>Age group (e.g., 0-4 years vs. 5-11 years)</b>   | NA                                                               | NA                                                                                                                                                                                                                                                                                                                                                                                                                                                                                                                                                                                                                                                                                                                                                                                                                                                                                                    | -Only children 5-11 years were included in the analysis.<br>-See Table 1.                                                                                                                                                                                       |
| <b>Sex (female vs. male)</b>                        | Female vs. male (2 doses and Omicron 3 doses)                    | Khan et al <sup>18</sup> :<br>2 doses; Delta period: VE (95% CI)<br>Female: 80 (70 to 87)<br>Male: 80 (72 to 87)<br><br>2 doses; Omicron period:                                                                                                                                                                                                                                                                                                                                                                                                                                                                                                                                                                                                                                                                                                                                                      | - Evidence limited but indicated no sex differences.                                                                                                                                                                                                            |

| Subgroup category                                                                                                                              | Subgroup defined in study              | Results                                                                                                                                                                                                                                                                                                                                                                                                                                                | Comments / interpretation                                                                                                                                                            |
|------------------------------------------------------------------------------------------------------------------------------------------------|----------------------------------------|--------------------------------------------------------------------------------------------------------------------------------------------------------------------------------------------------------------------------------------------------------------------------------------------------------------------------------------------------------------------------------------------------------------------------------------------------------|--------------------------------------------------------------------------------------------------------------------------------------------------------------------------------------|
|                                                                                                                                                |                                        | Female: 16 (12 to 19)<br>Male: 17 (13 to 21)<br><br>3 doses; Omicron period:<br>Female: 49 (41 to 56)<br>Male: 49 (41 to 56)                                                                                                                                                                                                                                                                                                                           |                                                                                                                                                                                      |
| <b>Location (geographical region)</b>                                                                                                          | USA vs. Israel<br>USA vs. Singapore    | -See Figure 2:<br>-SARS-CoV-2 infections: USA <sup>15,18,25</sup> vs. Israel <sup>14,17</sup> vs. Italy <sup>61</sup> vs. Qatar <sup>16</sup> vs. South Korea <sup>19</sup><br>-Symptomatic COVID-19: USA <sup>18,20</sup> vs. Singapore <sup>23</sup> vs. Israel <sup>17</sup> vs. Italy <sup>21</sup><br>-Hospitalisation: USA <sup>47,52</sup> vs. Singapore <sup>23</sup> vs. Italy <sup>21</sup> vs. Qatar <sup>16</sup> vs. Canada <sup>22</sup> | -No relevant or consistent differences observed except for SARS-CoV-2 infections where VE was higher for studies conducted in Israel <sup>14,17</sup> compared to the other studies. |
| <b>Baseline immunity (seropositive vs. seronegative) through natural infection, or after basic vaccination for booster-vaccination studies</b> | Prior SARS-CoV-2 infection: no vs. yes | Omicron period:<br>Prior SARS-CoV-2 infection $\geq 90$ days ago: <sup>18</sup> VE (95% CI)<br>With prior infection:<br>58 (49 to 66) at <3 months<br>27 (17 to 35) at 3 months or more<br><br>Without prior infection:<br>37 (34 to 41) at <3 months<br>-7 (-12 to -1) at 3 months or more                                                                                                                                                            | -Baseline immunity reported rarely which limits this subgroup analysis.<br>-See Table 1.                                                                                             |
| <b>Risk groups (e.g., for immunocompromised participants)</b>                                                                                  | NA                                     | NA                                                                                                                                                                                                                                                                                                                                                                                                                                                     | -VE according to risk groups not reported.                                                                                                                                           |
| <b>Concomitant treatments (e.g., B-cell depleting therapies)</b>                                                                               | NA                                     | NA                                                                                                                                                                                                                                                                                                                                                                                                                                                     | -No subgroup analyses were available for concomitant treatments.                                                                                                                     |

AE: adverse event; CI: confidence interval EPAR: European public assessment report; mRNA: messenger ribonucleic acid; NA: not applicable; NRSI: non-randomized studies of interventions; SAE: serious adverse event

## Sensitivity analyses

| Sensitivity analysis                                                                                             | Sensitivity analysis conducted                                      | Results                                                                                                                                                                                                                                                                                                                                                                                                                                                                                                                                                                                | Comments / interpretation                                                                                                                                                                                                                                                                                        |
|------------------------------------------------------------------------------------------------------------------|---------------------------------------------------------------------|----------------------------------------------------------------------------------------------------------------------------------------------------------------------------------------------------------------------------------------------------------------------------------------------------------------------------------------------------------------------------------------------------------------------------------------------------------------------------------------------------------------------------------------------------------------------------------------|------------------------------------------------------------------------------------------------------------------------------------------------------------------------------------------------------------------------------------------------------------------------------------------------------------------|
| <b>Risk of bias, e.g., low risk of bias vs. unclear and high risk of bias studies with the same study design</b> | NA                                                                  | NA                                                                                                                                                                                                                                                                                                                                                                                                                                                                                                                                                                                     | -No outlier results identified.<br>-Sensitivity analysis not meaningful due to lack of studies and lack of low risk of bias results.                                                                                                                                                                             |
| <b>Study design (e.g. controlled vs. uncontrolled; prospective vs. retrospective)</b>                            | NA                                                                  | NA                                                                                                                                                                                                                                                                                                                                                                                                                                                                                                                                                                                     | -No outlier results identified.<br>-Sensitivity analysis not meaningful due to lack of studies and variation of study designs.                                                                                                                                                                                   |
| <b>Type of publication: peer-reviewed vs. other publication formats (e.g. preprint articles, letters)</b>        | Symptomatic COVID-19: Preprint vs. peer reviewed article            | SARS-CoV-2 infections: VE (95% CI) Random-effects metaanalysis Preprint: <sup>25</sup> 44.2% (27.5 to 57.0) vs. Peer-reviewed articles: <sup>14,16-19,61</sup> 42.6% (28.2 to 54.2)<br><br>Symptomatic COVID-19: VE (95% CI), random-effects meta-analysis: Preprint: <sup>22,23</sup> 44.9% (95% CI 21.6 to 61.4) vs. peer-reviewed articles: <sup>17,18,20,21</sup> 28.1% (95% CI 24.5 to 31.6)<br><br>Hospitalisation: VE (95% CI) Random-effects metaanalysis Preprint: <sup>22,23,54</sup> 77.4% (61.9 to 86.6) vs. Peer-reviewed articles: <sup>21,52</sup> 73.5% (66.2 to 79.3) | -Sensitivity analyses did not reveal any signals regarding type of publication                                                                                                                                                                                                                                   |
| <b>Random-effects vs. fixed-effect model meta-analysis</b>                                                       | -All outcomes included in meta-analysis: see Figure 2 and Figure 3. | -Differences between random-effects and fixed-effects estimates from meta-analyses were marginal for all outcomes for point estimates.<br>-The 95% CI was considerably wider for the random-effects model for the outcomes: SARS-CoV-2 infections, COVID-19, hospitalisation, local reactions dose 1 and dose 2. See Figure 2 and Figure 3.                                                                                                                                                                                                                                            | -Comparing all random-effects and fixed-effects estimates from meta-analyses did not indicate clinically relevant differences between the point estimates but relevant differences for precision of the following outcomes: SARS-CoV-2 infections, COVID-19, hospitalisation, local reactions dose 1 and dose 2. |
| <b>Exclusion of studies with inexplicably high or low effects</b>                                                | NA                                                                  | NA                                                                                                                                                                                                                                                                                                                                                                                                                                                                                                                                                                                     | -No outlier results identified.                                                                                                                                                                                                                                                                                  |

NA: not applicable





## References

1. Sterne JAC, Hernán MA, McAleenan A, Reeves BC, Higgins JPT. Chapter 25: Assessing risk of bias in a non-randomized study. In: Higgins JPT, Thomas J, Chandler J, et al., eds. *Cochrane Handbook for Systematic Reviews of Interventions* version 63 (updated February 2022): Cochrane; 2022.
2. Sterne JAC, Hernán MA, Reeves BC, et al. ROBINS-I: a tool for assessing risk of bias in non-randomised studies of interventions. *BMJ* 2016; **355**: i4919.
3. Hayden JA, van der Windt DA, Cartwright JL, Côté P, Bombardier C. Assessing Bias in Studies of Prognostic Factors. *Annals of Internal Medicine* 2013; **158**(4): 280-6.
4. Riley RD, Hayden JA, Steyerberg EW, et al. Prognosis Research Strategy (PROGRESS) 2: prognostic factor research. *PLoS Med* 2013; **10**(2): e1001380.
5. Langan D, Higgins JPT, Jackson D, et al. A comparison of heterogeneity variance estimators in simulated random-effects meta-analyses. *Res Synth Methods* 2019; **10**(1): 83-98.
6. Hartung J, Knapp G. On tests of the overall treatment effect in meta-analysis with normally distributed responses. *Stat Med* 2001; **20**(12): 1771-82.
7. Hartung J, Knapp G. A refined method for the meta-analysis of controlled clinical trials with binary outcome. *Stat Med* 2001; **20**(24): 3875-89.
8. Jackson D, Law M, Rucker G, Schwarzer G. The Hartung-Knapp modification for random-effects meta-analysis: A useful refinement but are there any residual concerns? *Stat Med* 2017; **36**(25): 3923-34.
9. Page MJ HJ, Sterne JA, . Chapter 13: Assessing risk of bias due to missing results in a synthesis. In: Higgins JP TJ, Chandler J, Cumpston M, Li T, Page MJ, et al, editor. *Cochrane Handbook for Systematic Reviews of Interventions* available from: [www.training.cochrane.org/handbook](http://www.training.cochrane.org/handbook).: Cochrane; 2022.
10. Schünemann H, Brožek J, Guyatt G, Oxman A. GRADE handbook for grading quality of evidence and strength of recommendations. [www.guidelinedevelopment.org/handbook](http://www.guidelinedevelopment.org/handbook); 2013.
11. Schünemann HJ, Cuello C, Akl EA, et al. GRADE guidelines: 18. How ROBINS-I and other tools to assess risk of bias in nonrandomized studies should be used to rate the certainty of a body of evidence. *J Clin Epidemiol* 2019; **111**: 105-14.
12. Walter EB, Talaat KR, Sabharwal C, et al. Evaluation of the BNT162b2 Covid-19 Vaccine in Children 5 to 11 Years of Age. *N Engl J Med* 2022; **386**(1): 35-46.
13. Creech CB, Anderson E, Berthaud V, et al. Evaluation of mRNA-1273 Covid-19 Vaccine in Children 6 to 11 Years of Age. *N Engl J Med* 2022; **386**(21): 2011-23.
14. Amir O, Goldberg Y, Mandel M, et al. Initial protection against SARS-CoV-2 omicron lineage infection in children and adolescents by BNT162b2 in Israel: an observational study. *Lancet Infect Dis* 2023; **23**(1): 67-73.
15. Fowlkes AL, Yoon SK, Lutrick K, et al. Effectiveness of 2-Dose BNT162b2 (Pfizer BioNTech) mRNA Vaccine in Preventing SARS-CoV-2 Infection Among Children Aged 5-11 Years and Adolescents Aged 12-15 Years - PROTECT Cohort, July 2021-February 2022. *MMWR Morb Mortal Wkly Rep* 2022; **71**(11): 422-8.
16. Chemaitelly H, AlMukdad S, Ayoub HH, et al. Covid-19 Vaccine Protection among Children and Adolescents in Qatar. *N Engl J Med* 2022; **387**(20): 1865-76.
17. Cohen-Stavi CJ, Magen O, Barda N, et al. BNT162b2 Vaccine Effectiveness against Omicron in Children 5 to 11 Years of Age. *New England Journal of Medicine* 2022; **387**(3): 227-36.
18. Khan FL, Nguyen JL, Singh TG, et al. Estimated BNT162b2 Vaccine Effectiveness Against Infection With Delta and Omicron Variants Among US Children 5 to 11 Years of Age. *JAMA Network Open* 2022; **5**(12): e2246915-e.
19. Jang EJ, Choe YJ, Kim RK, Park Y-J. BNT162b2 Vaccine Effectiveness Against the SARS-CoV-2 Omicron Variant in Children Aged 5 to 11 Years. *JAMA Pediatrics* 2023.

20. Fleming-Dutra KE, Britton A, Shang N, et al. Association of Prior BNT162b2 COVID-19 Vaccination With Symptomatic SARS-CoV-2 Infection in Children and Adolescents During Omicron Predominance. *JAMA* 2022; **327**(22): 2210-9.
21. Sacco C, Del Manso M, Mateo-Urdiales A, et al. Effectiveness of BNT162b2 vaccine against SARS-CoV-2 infection and severe COVID-19 in children aged 5–11 years in Italy: a retrospective analysis of January–April, 2022. *The Lancet* 2022; **400**(10346): 97-103.
22. Piché-Renaud PP, Swayze S, Buchan S, et al. Vaccine Effectiveness of BNT162b2 Against Omicron in Children Aged 5-11 Years: A Test-Negative Design. *SSRN*, 2022. doi: 10.2139/ssrn.4176388 (accessed 18.01.2023).
23. Tan S, Cook AR, Heng D, Ong B, Lye DC, Tan KB. Effectiveness of BNT162b2 Vaccine against Omicron in Children 5 to 11 Years. *SSRN*, 2022. doi: 10.2139/ssrn.4052133 (accessed 18.01.2023).
24. Suntronwong N, Vichaiwattana P, Klinfueng S, et al. SARS-CoV-2 infection- induced seroprevalence among children and associated risk factors during pre- and omicron-dominant wave, from January 2021 through November 2022, Thailand: Longitudinal study. *medRxiv*, 2022. doi: 10.1101/2022.12.01.22283006 (accessed 23.01.2023).
25. Dorabawila V, Hoefer D, Bauer UE, Bassett MT, Lutterloh E, Rosenberg ES. Effectiveness of the BNT162b2 vaccine among children 5-11 and 12-17 years in New York after the Emergence of the Omicron Variant. *medRxiv*, 2022. doi: 10.1101/2022.02.25.22271454 (accessed 18.01.2023).
26. Mattiuzzi C, Lippi G. Real-world effectiveness of COVID-19 vaccination among children in Italy. *Int J Infect Dis* 2022; **122**: 70-1.
27. Shi DS, Whitaker M, Marks KJ, et al. Hospitalizations of Children Aged 5-11 Years with Laboratory-Confirmed COVID-19 - COVID-NET, 14 States, March 2020-February 2022. *MMWR Morb Mortal Wkly Rep* 2022; **71**(16): 574-81.
28. Straus W, Urdaneta V, Esposito DB, et al. Analysis of Myocarditis Among 252 Million mRNA-1273 Recipients Worldwide. *Clin Infect Dis* 2022.
29. Bartsch YC, St Denis KJ, Kaplonek P, et al. SARS-CoV-2 mRNA vaccination elicits robust antibody responses in children. *Science Translational Medicine*; **0**(0): eabn9237.
30. Bartsch YC, Chen JW, Kang J, et al. BNT162b2 induces robust cross-variant SARS-CoV-2 immunity in children. *npj Vaccines* 2022; **7**(1): 158.
31. Bloise S, Marcellino A, Frasacco B, et al. Cross-Sectional Survey on BNT162b2 mRNA COVID-19 Vaccine Serious Adverse Events in Children 5 to 11 Years of Age: A Monocentric Experience. *Vaccines (Basel)* 2022; **10**(8).
32. Capponi M, Pulvirenti F, Cinicola BL, et al. Short-Term Side Effects and SARS-CoV-2 Infection after COVID-19 Pfizer-BioNTech Vaccine in Children Aged 5-11 Years: An Italian Real-World Study. *Vaccines (Basel)* 2022; **10**(7).
33. Chantasrisawad N, Puthanakit T, Kornsitthikul K, et al. Immunogenicity to SARS-CoV-2 Omicron variant among school-aged children with 2-dose of inactivated SARS-CoV-2 vaccines followed by BNT162b2 booster. *Vaccine: X* 2022; **12**: 100221.
34. Cinicola BL, Piano Mortari E, Zicari AM, et al. The BNT162b2 vaccine induces humoral and cellular immune memory to SARS-CoV-2 Wuhan strain and the Omicron variant in children 5 to 11 years of age. *Frontiers in Immunology* 2022; **13**.
35. Cocchio S, Zabeo F, Tremolada G, et al. COVID-19 Vaccine Effectiveness against Omicron Variant among Underage Subjects: The Veneto Region's Experience. *Vaccines (Basel)* 2022; **10**(8).
36. Doucette EJ, Gray J, Fonseca K, et al. A Longitudinal Seroepidemiology Study to Evaluate Antibody Response to SARS-CoV-2 Virus and Vaccination in Children in Calgary, Canada from July 2020 to April 2022. *medRxiv*, 2022. doi: 10.1101/2022.11.02.22281665 (accessed 23.01.2023).
37. Elias MD, Truong DT, Oster ME, et al. Examination of Adverse Reactions After COVID-19 Vaccination Among Patients With a History of Multisystem Inflammatory Syndrome in Children. *JAMA Network Open* 2023; **6**(1): e2248987-e.

38. Girard B, Tomassini JE, Deng W, et al. mRNA-1273 Vaccine-elicited Neutralization of SARS-CoV-2 Omicron in Adolescents and Children. *medRxiv*, 2022. doi: 10.1101/2022.01.24.22269666 (accessed 18.01.2023).
39. Hartono SP, Sharma HP, Bundy V, Thompkins JD, Kochis SR, Brooks JP. Safety outcomes of SARS-CoV-2 vaccination in pediatric patients with a first dose reaction history or allergy to polyethylene glycol or polysorbate. *J Allergy Clin Immunol Pract* 2022; **10**(8): 2172-5.e1.
40. Hause AM, Shay DK, Klein NP, et al. Safety of COVID-19 Vaccination in US Children Ages 5-11 Years. *Pediatrics* 2022; **150**(2): e2022057313.
41. Hause AM, Baggs J, Marquez P, et al. Safety Monitoring of Pfizer-BioNTech COVID-19 Vaccine Booster Doses Among Children Aged 5-11 Years - United States, May 17-July 31, 2022. *MMWR Morb Mortal Wkly Rep* 2022; **71**(33): 1047-51.
42. Hause AM, Marquez P, Zhang B, et al. Safety Monitoring of Bivalent COVID-19 mRNA Vaccine Booster Doses Among Children Aged 5-11 Years - United States, October 12-January 1, 2023. *MMWR Morb Mortal Wkly Rep* 2023; **72**(2): 39-43.
43. Hu M, Wong HL, Feng Y, et al. Results of safety monitoring of BNT162b2 (Pfizer-BioNTech) COVID-19 vaccine in U.S. children aged 5-17 years. *medRxiv*, 2022. doi: 10.1101/2022.10.28.22281532 (accessed 23.01.2023).
44. Joseph G, Klein E, Lustig Y, et al. Real-World Immunogenicity and Reactogenicity of Two Doses of Pfizer-BioNTech COVID-19 Vaccination in Children Aged 5-11 Years. *Vaccines (Basel)* 2022; **10**(11).
45. Kastl AJ, Weaver KN, Zhang X, et al. Humoral Immune Response and Safety of SARS-CoV-2 Vaccination in Pediatric Inflammatory Bowel Disease. *Am J Gastroenterol* 2023; **118**(1): 129-37.
46. Kim S, Heo Y, Seo SY, Lim DS, Cho E, Lee YK. Adverse events of the Pfizer-BioNTech COVID-19 vaccine in Korean children and adolescents aged 5 to 17 years. *Osong Public Health Res Perspect* 2022; **13**(5): 382-90.
47. Klein NP, Stockwell MS, Demarco M, et al. Effectiveness of COVID-19 Pfizer-BioNTech BNT162b2 mRNA Vaccination in Preventing COVID-19-Associated Emergency Department and Urgent Care Encounters and Hospitalizations Among Nonimmunocompromised Children and Adolescents Aged 5-17 Years - VISION Network, 10 States, April 2021-January 2022. *MMWR Morb Mortal Wkly Rep* 2022; **71**(9): 352-8.
48. Leung D, Chan EY-h, Mu X, et al. Humoral and Cellular Immunogenicity and Safety of 3 Doses of CoronaVac and BNT162b2 in Young Children and Adolescents with Kidney Diseases. *medRxiv*, 2022. doi: 10.1101/2022.09.14.22279916 (accessed 23.01.2023).
49. Leung D, Duque J, Yip K, So H, Wong W, Lau Y. Effectiveness of BNT162b2 and CoronaVac in children and adolescents against SARS-CoV-2 infection during Omicron BA.2 wave in Hong Kong. *Commun Med* 2023; **3**(3).
50. Malden DE, Gee J, Glenn S, et al. Reactions following Pfizer-BioNTech COVID-19 mRNA vaccination and related healthcare encounters among 7,077 children aged 5-11 years within an integrated healthcare system. *Vaccine* 2023; **41**(2): 315-22.
51. Nygaard U, Holm M, Dungu KHS, et al. Risk of Myopericarditis After COVID-19 Vaccination in Danish Children Aged 5-11 Years. *Pediatrics* 2022; **150**(2): e2022057508.
52. Price AM, Olson SM, Newhams MM, et al. BNT162b2 Protection against the Omicron Variant in Children and Adolescents. *N Engl J Med* 2022; **386**(20): 1899-909.
53. Ripabelli G, Sammarco ML, D'Amico A, et al. Safety of mRNA BNT162b2 COVID-19 (Pfizer-BioNTech) vaccine in children aged 5-11 years: Results from an active pharmacovigilance study in central Italy. *Hum Vaccin Immunother* 2022; **18**(6): 2126668.
54. Rosa Duque JS, Leung D, Yip KM, et al. Effectiveness of BNT162b2 and CoronaVac against pediatric COVID-19-associated hospitalization and moderate-to-severe disease. *medRxiv*, 2022. doi: 10.1101/2022.09.09.22279426 (accessed 18.01.2023).
55. Simmons AE, Amoako A, Grima A, Murison K, Tuite A, Fisman D. Vaccine Effectiveness Against Hospitalization Among Adolescent and Pediatric SARS-CoV-2 Cases in Ontario, Canada. *medRxiv*, 2022. doi: 10.1101/2022.03.24.22272919 (accessed 23.01.2023).

56. Stich M, Di Cristanziano V, Tönshoff B, et al. Humoral immune response and live-virus neutralization of the SARS-CoV-2 omicron (BA.1) variant after COVID-19 mRNA vaccination in children and young adults with chronic kidney disease. *Pediatr Nephrol* 2022; 1-14.
57. Wanlapakorn N, Kanokudom S, Phowatthanasathian H, et al. Comparison of the reactogenicity and immunogenicity between two-dose mRNA COVID-19 vaccine and inactivated followed by an mRNA vaccine in children aged 5 - 11 years. *medRxiv*, 2022. doi: 10.1101/2022.11.07.22282028 (accessed 23.01.2023).
58. Wood N, Lopez LK, Glover C, et al. Active safety surveillance of COVID-19 mRNA vaccines in children aged 5-15 years in Australia. *medRxiv*, 2022. doi: 10.1101/2022.07.19.22277827 (accessed 23.01.2023).
59. Yoshida M, Kobashi Y, Shimazu Y, et al. Time course of adverse reactions following BNT162b2 vaccination in healthy and allergic disease individuals aged 5-11 years and comparison with individuals aged 12-15 years: an observational and historical cohort study. *Eur J Pediatr* 2023; **182**(1): 123-33.
60. Zambrano LD, Newhams MM, Olson SM, et al. BNT162b2 mRNA Vaccination Against COVID-19 is Associated with Decreased Likelihood of Multisystem Inflammatory Syndrome in U.S. Children Ages 5-18 Years. *Clin Infect Dis* 2022; (Epub ahead of print).
61. Cocchio S, Zabeo F, Tremolada G, et al. COVID-19 Vaccine Effectiveness against Omicron Variant among Underage Subjects: The Veneto Region's Experience. *Vaccines* 2022; **10**(8).
62. Altarawneh HN, Chemaitelly H, Ayoub HH, et al. Effects of Previous Infection and Vaccination on Symptomatic Omicron Infections. *New England Journal of Medicine* 2022; **387**(1): 21-34.
